# Supplementary material for: Future Climate Change and Anthropogenic Disturbance Promote the Invasions of the World’s Worst Invasive Insect Pests
Source: MDPI journal article supplement (doi:10.3390/insects15040280), 2024-04-16

## S9 Potential ranges of 15 worst insect pest

*Linepithema humile*

Current, F126, F585, M126 and M585 in this order

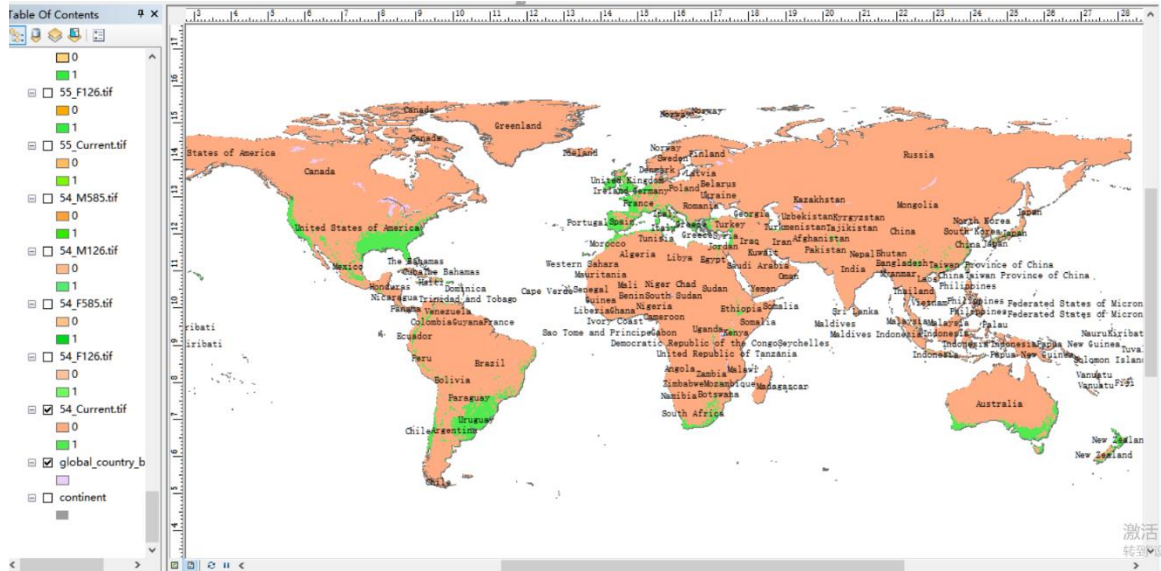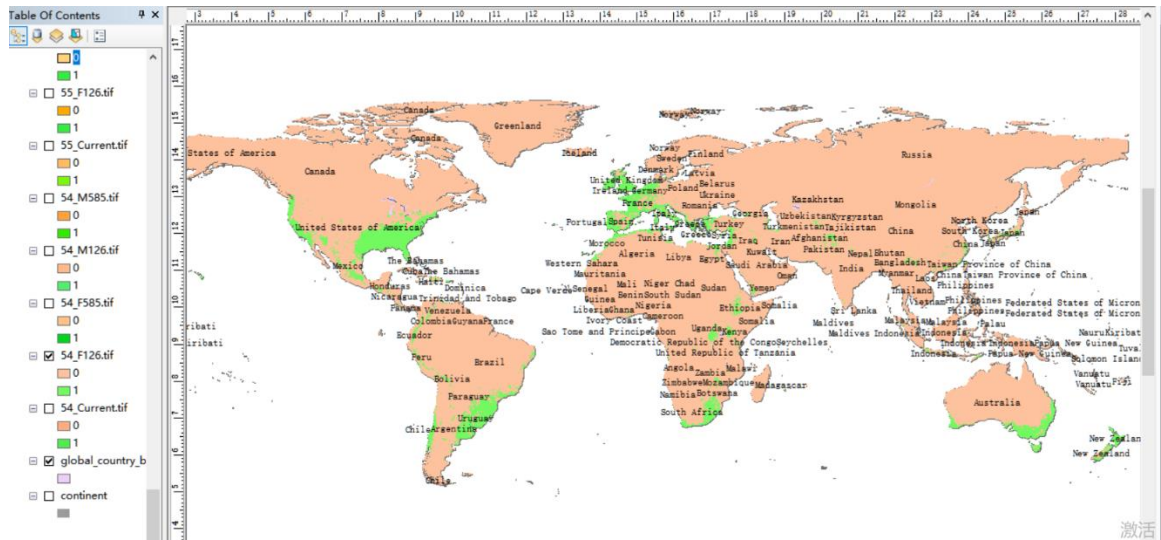

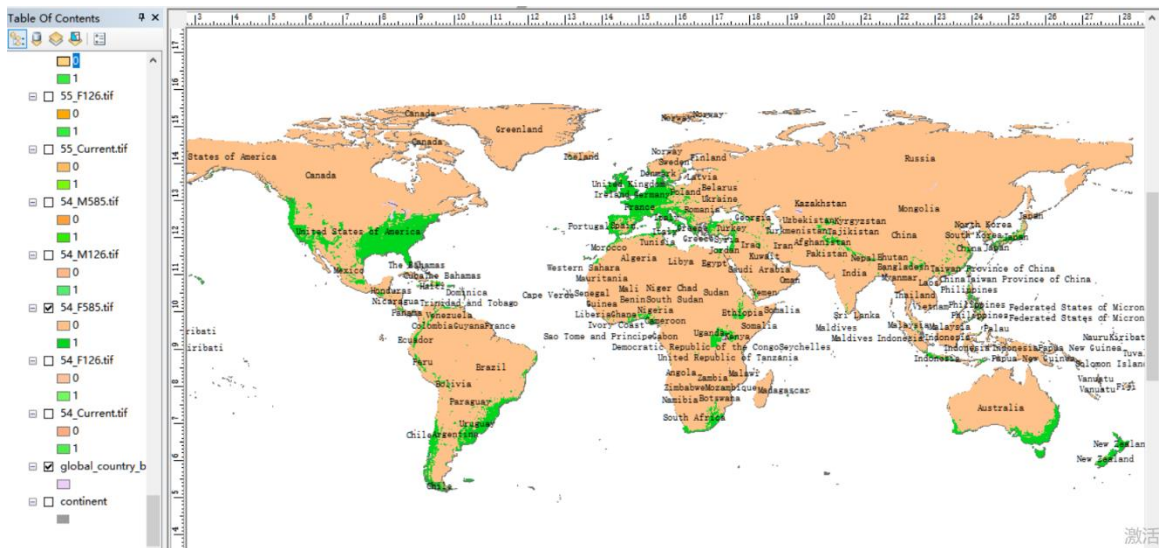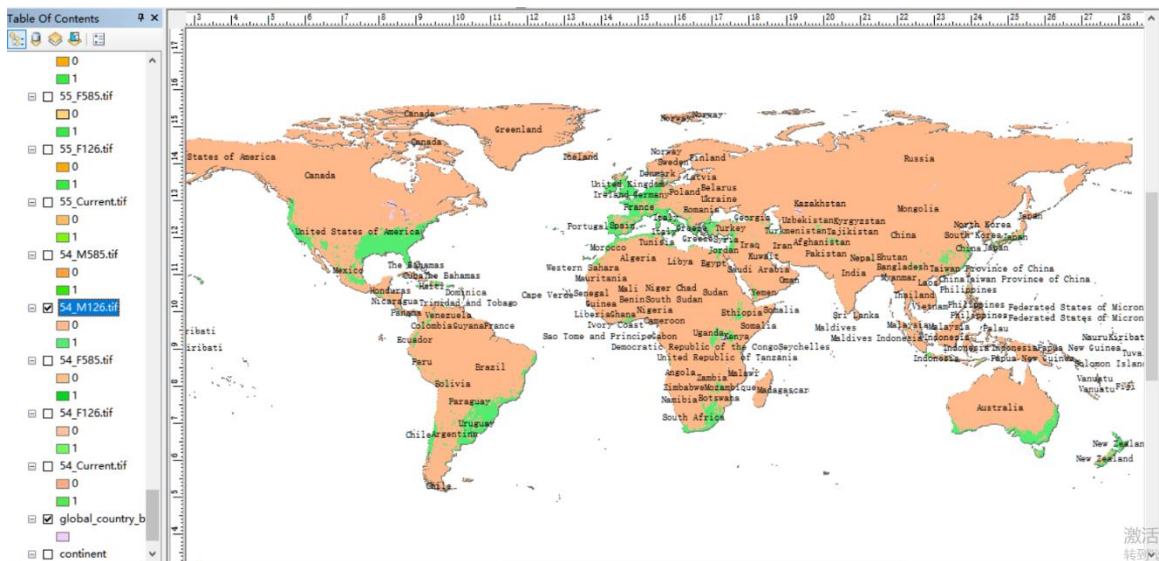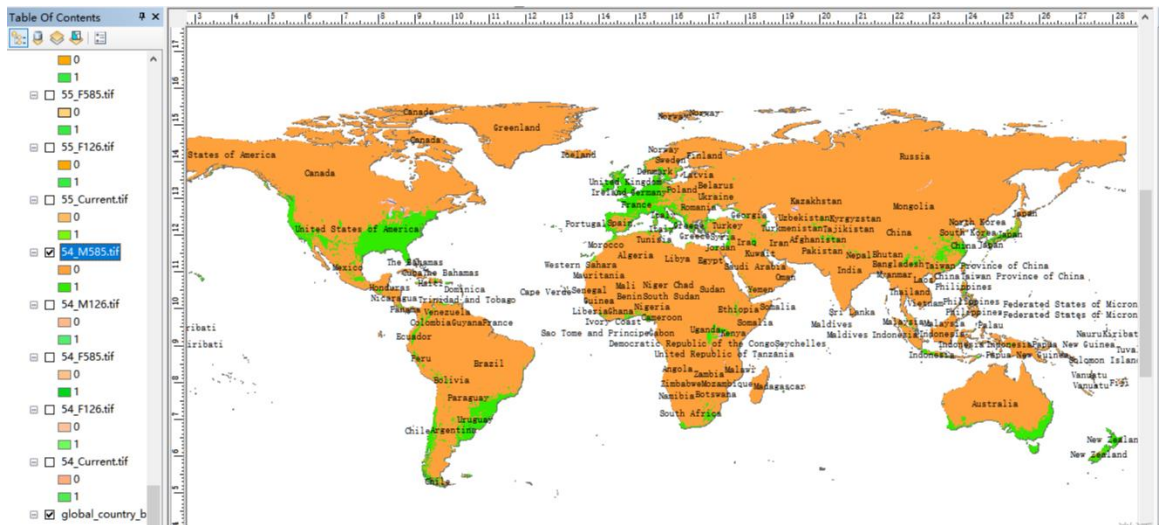

*Anoplophora glabripennis*

Current, F126, F585, M126 and M585 in this order

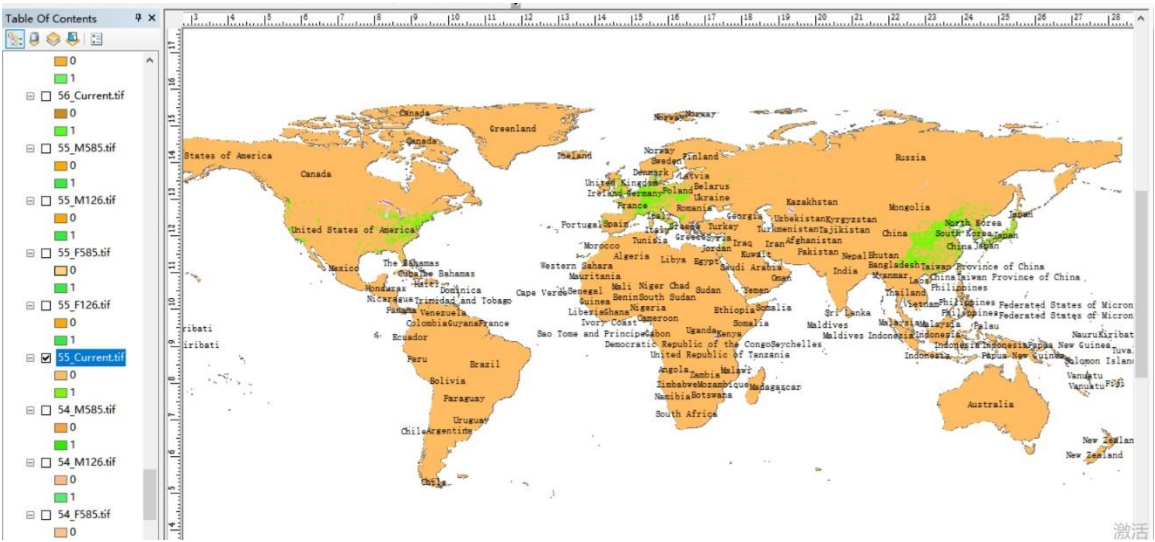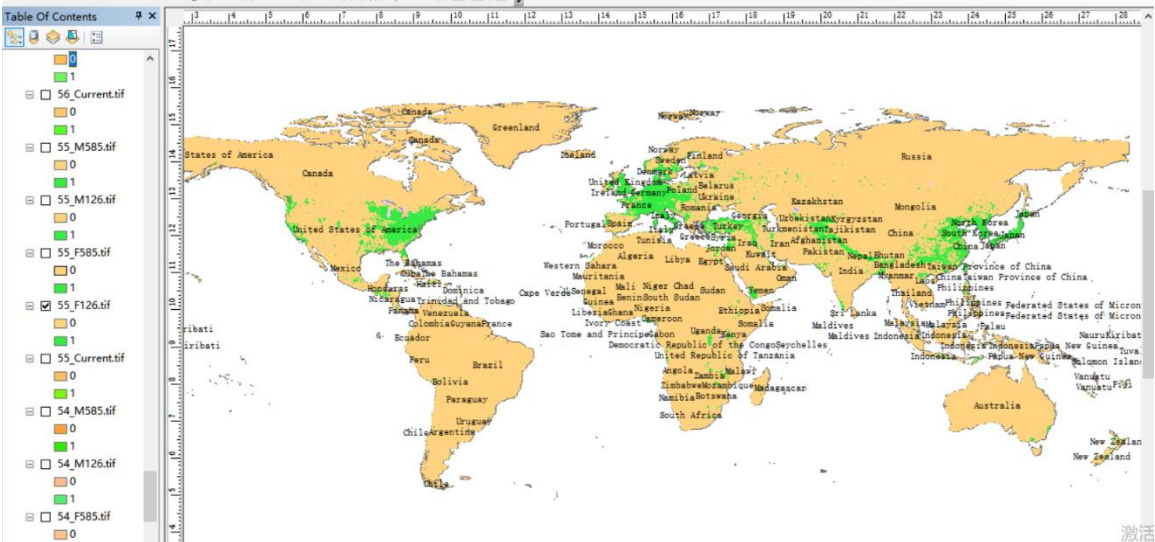



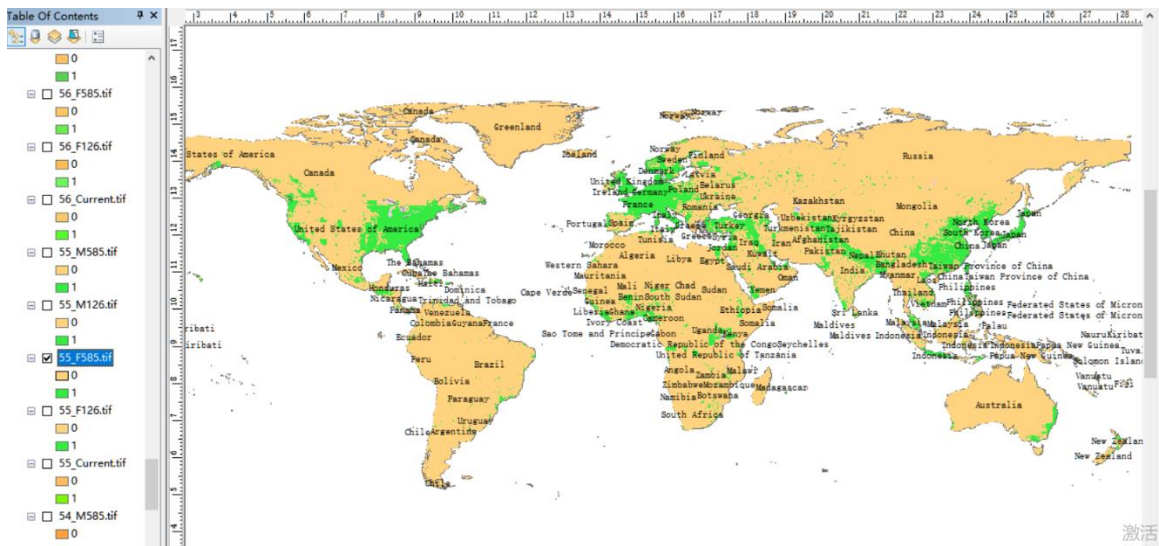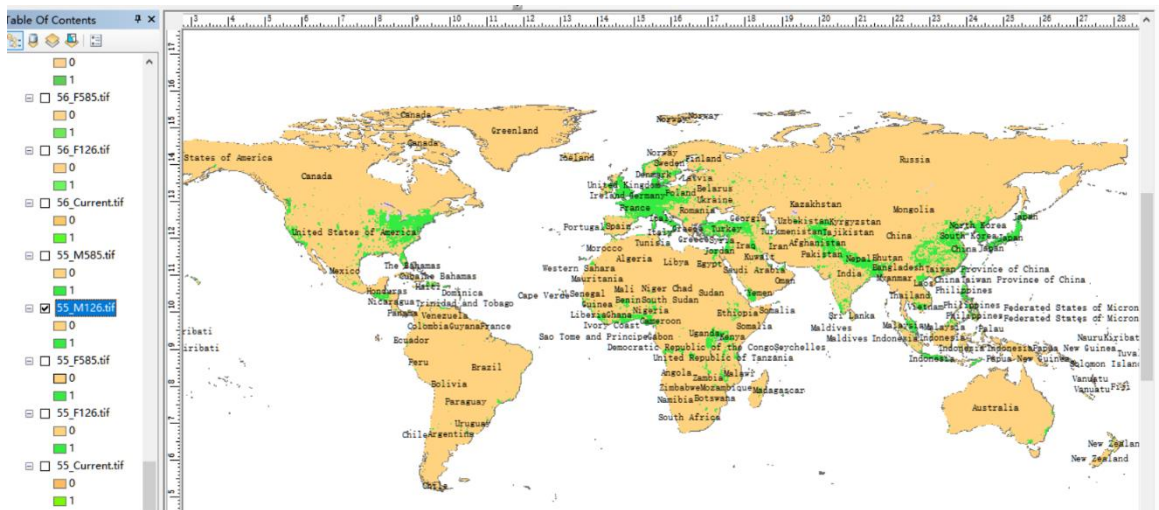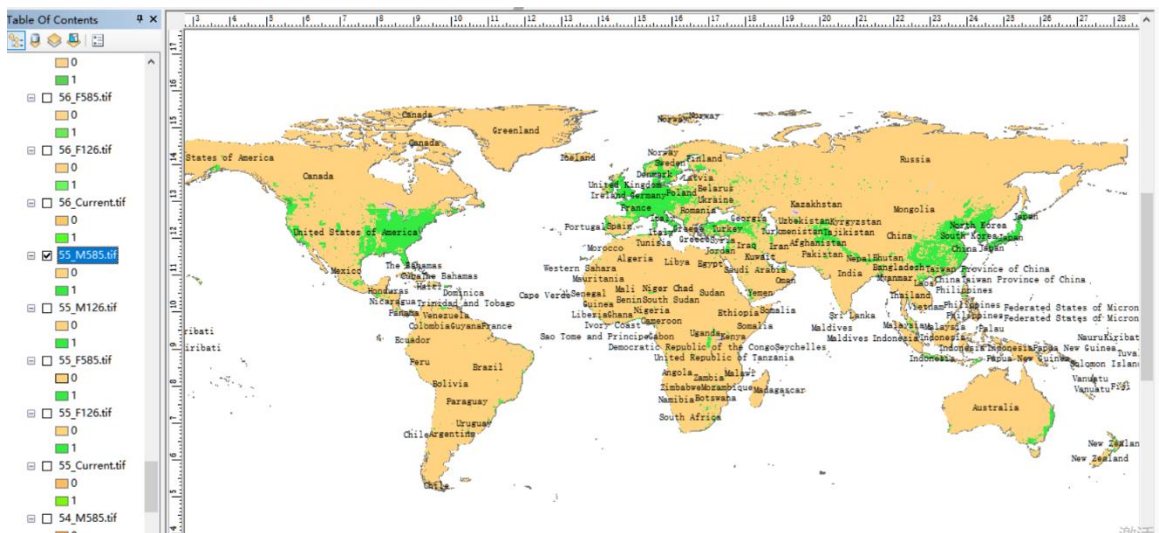

*Aedes albopictus*

Current, F126, F585, M126 and M585 in this order

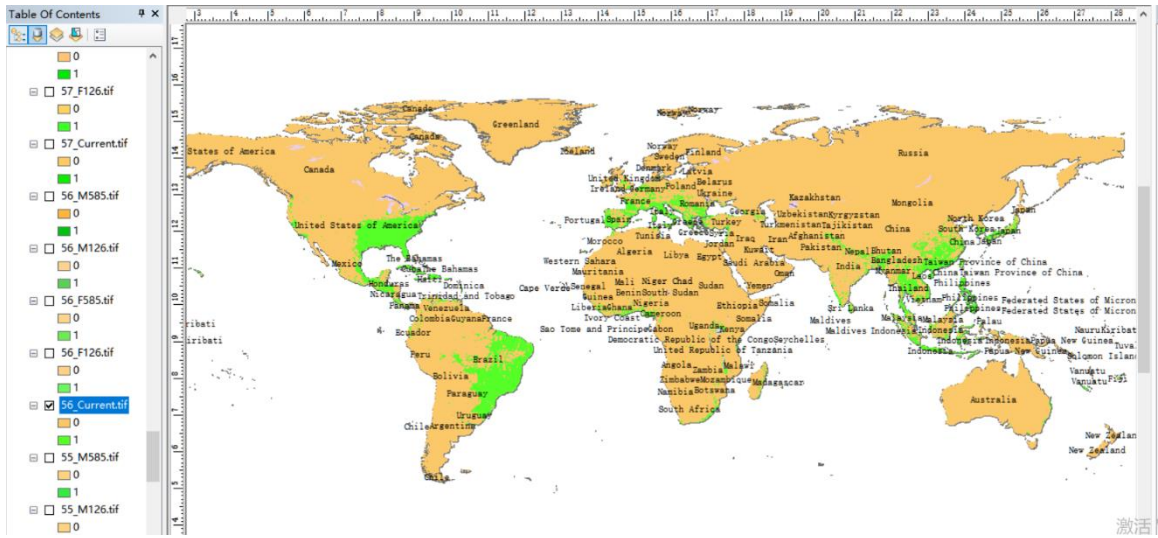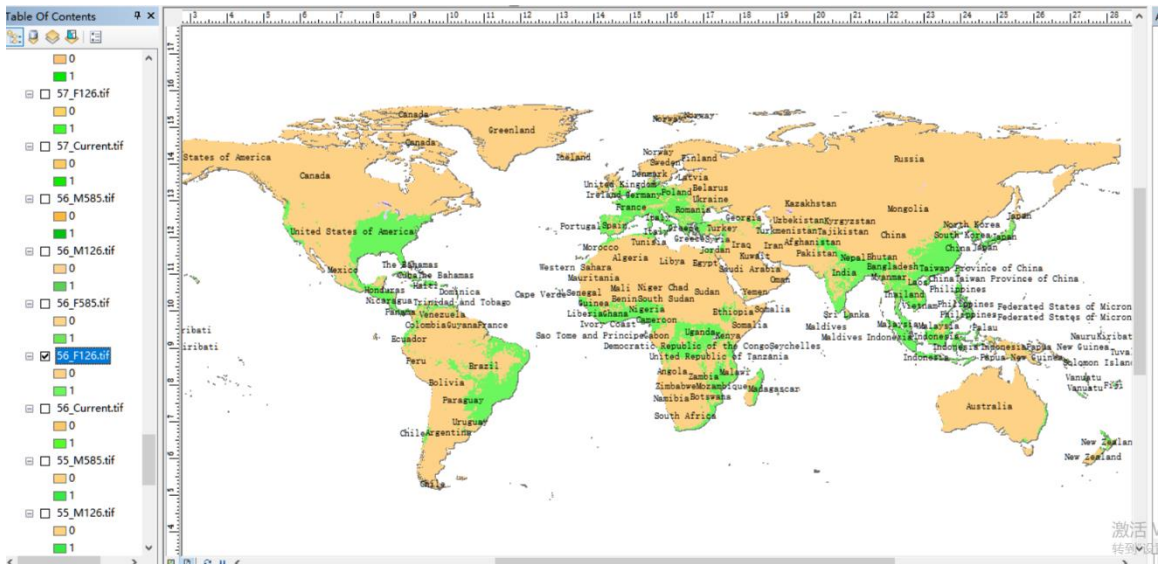

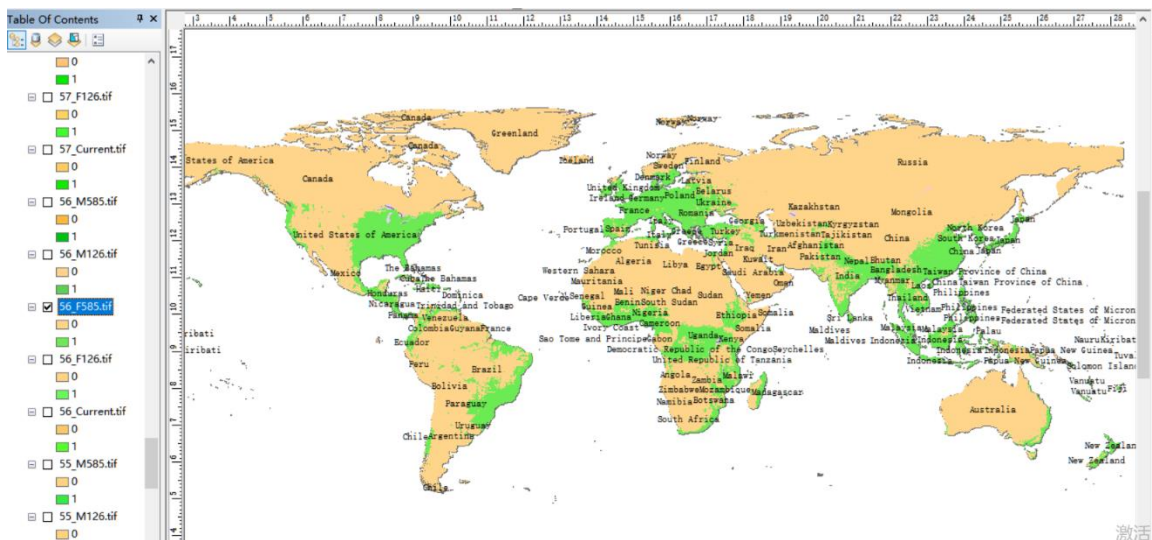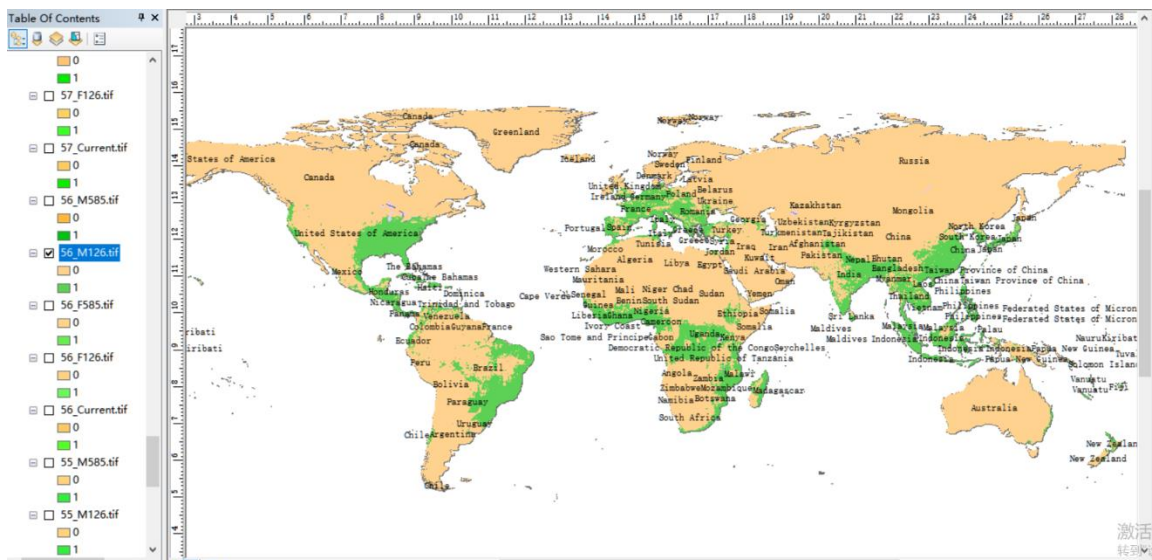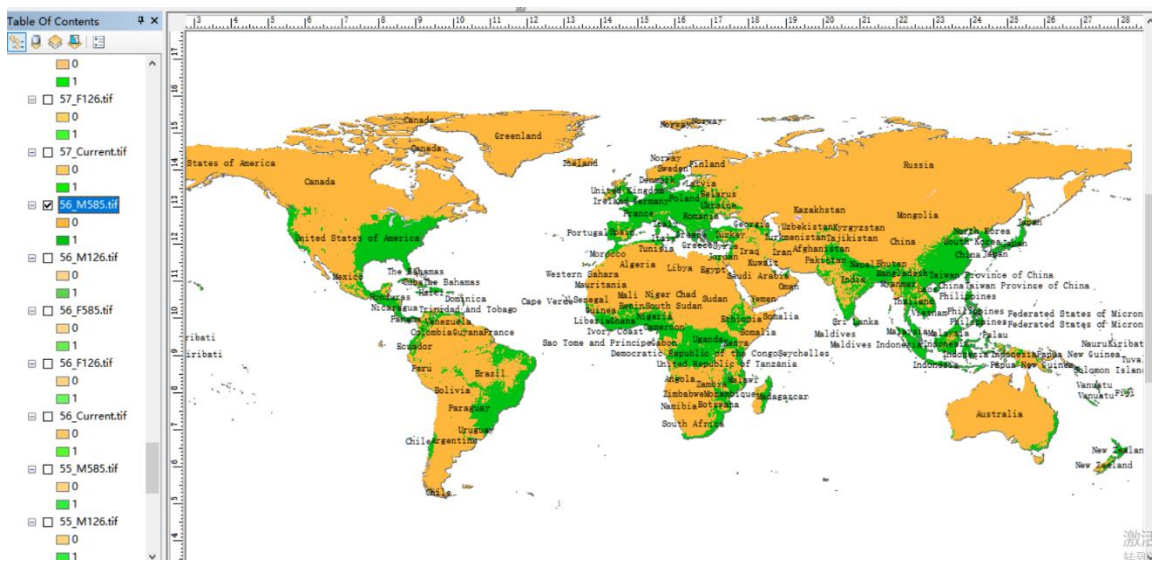



Current, F126, F585, M126 and M585 in this order

Current, F126, F585, M126 and M585 in this order

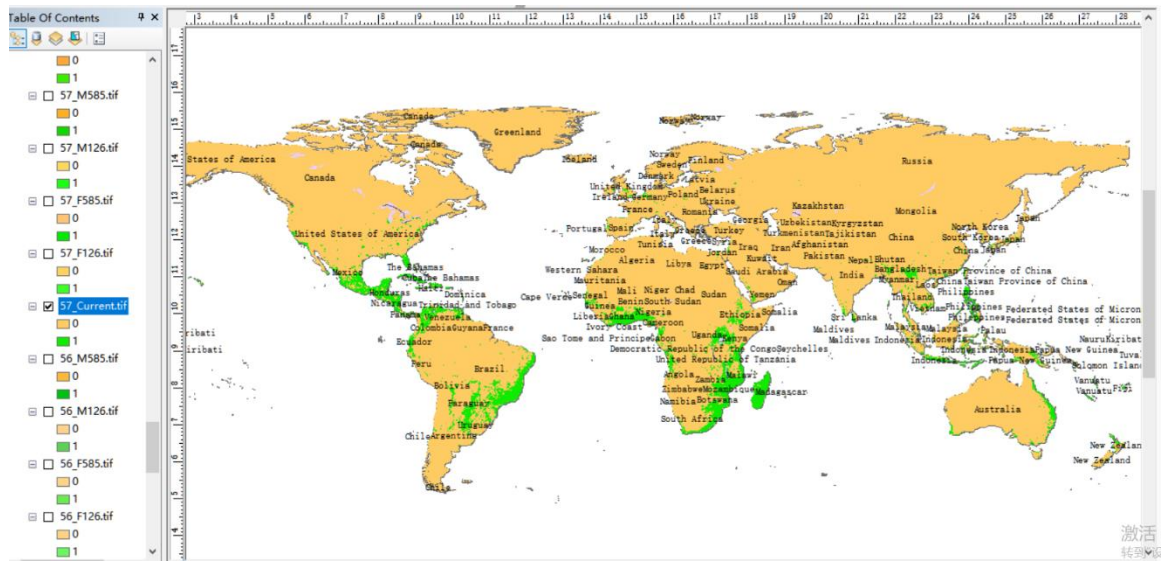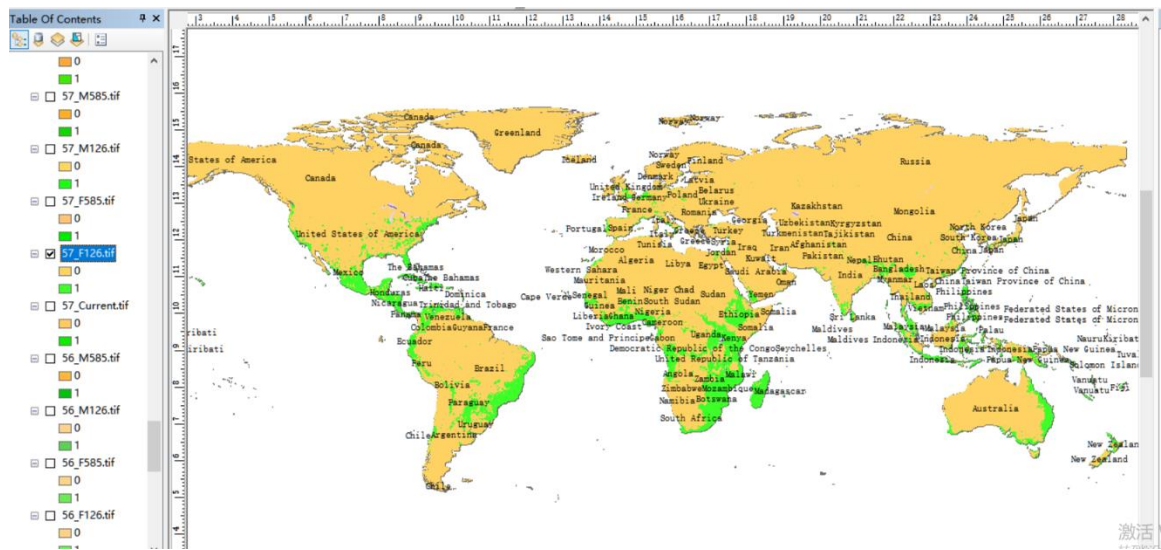

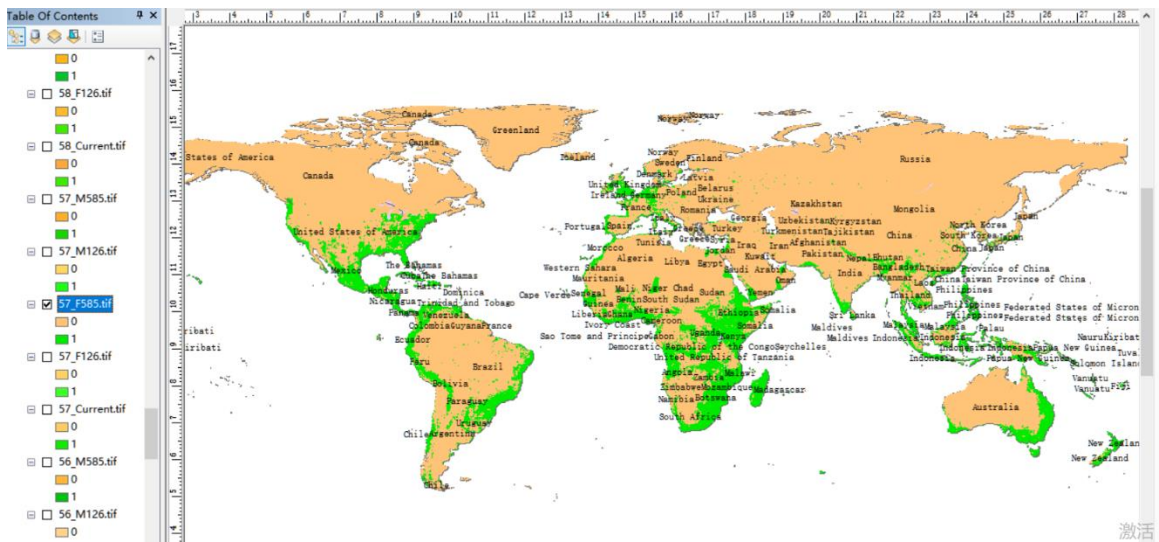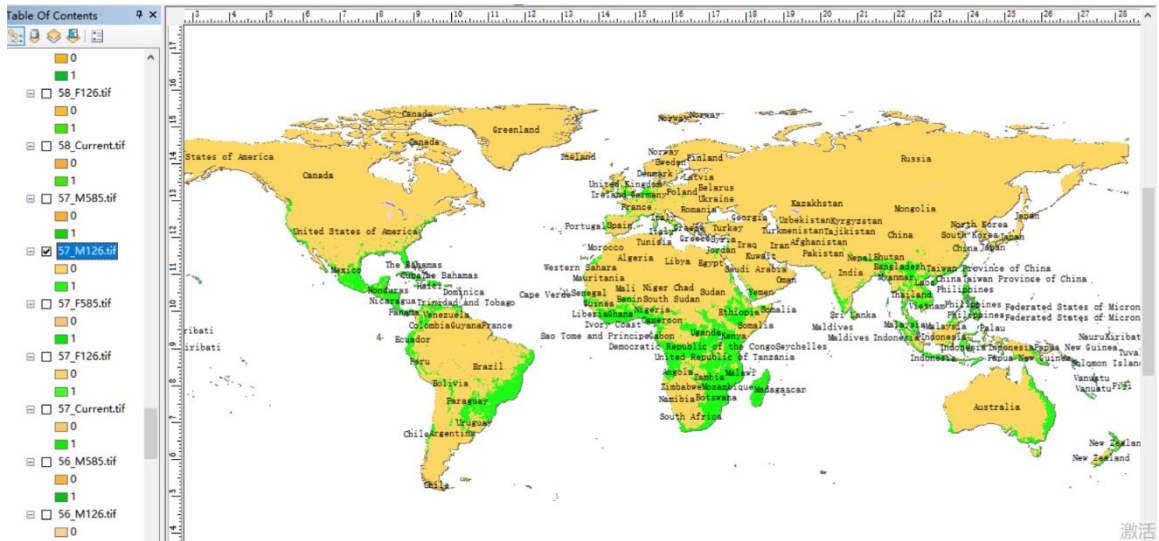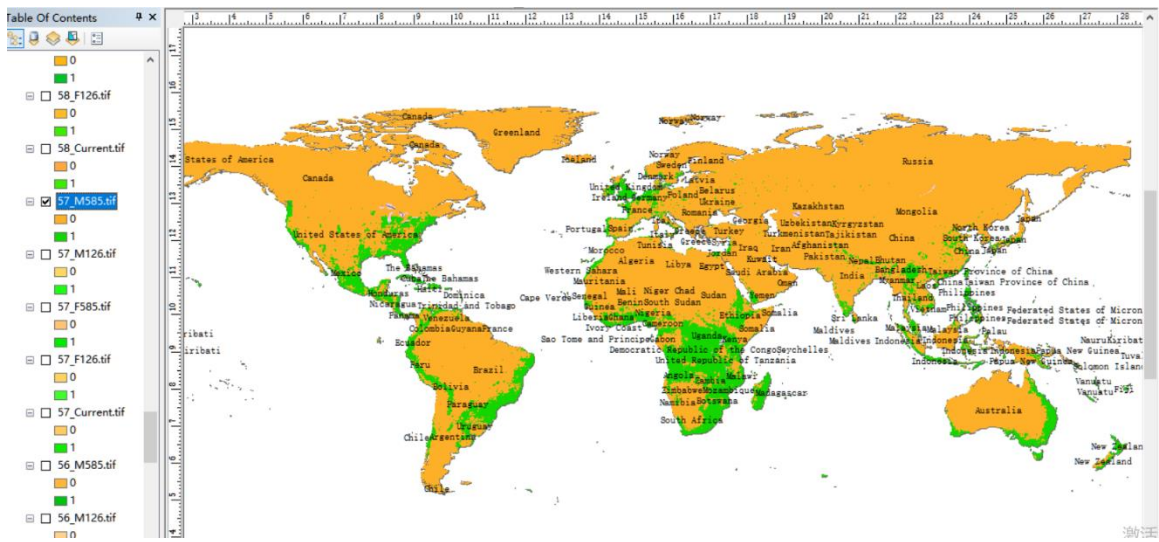



*Anopheles quadrimaculatus*

Current, F126, F585, M126 and M585 in this order

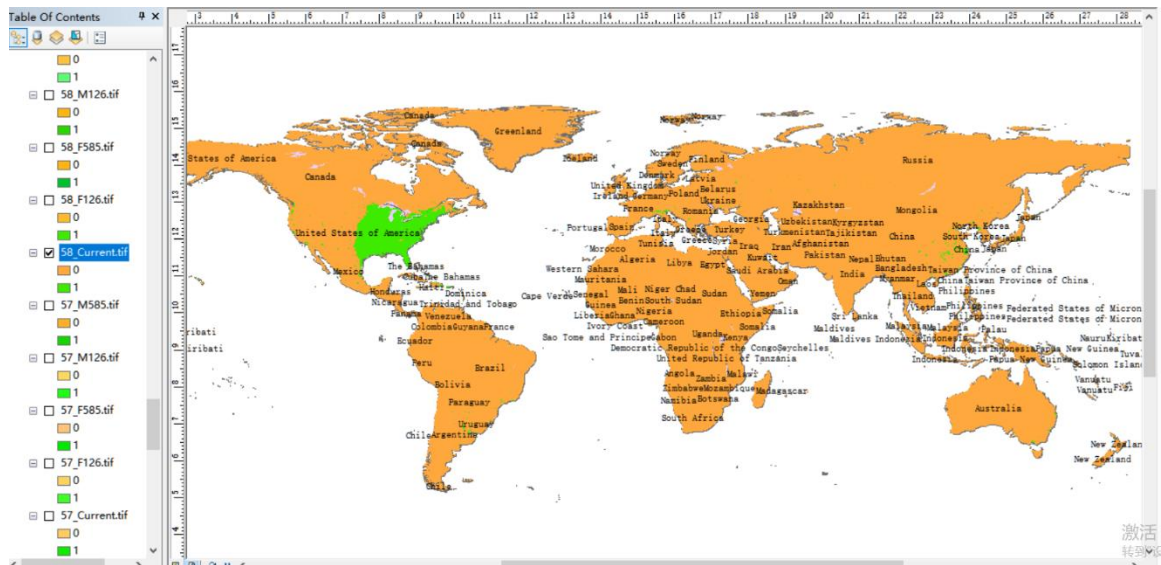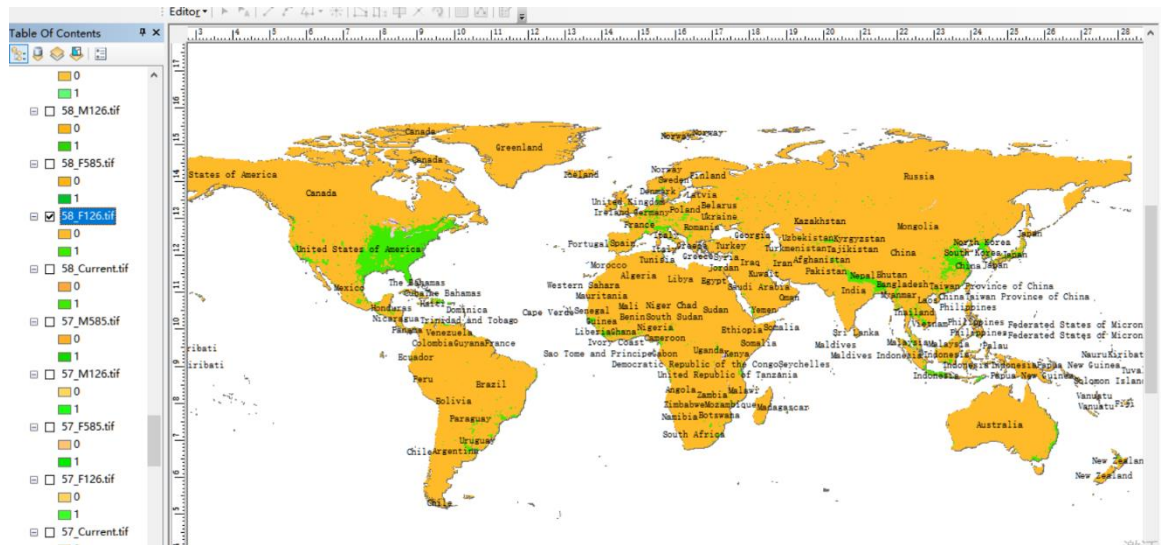

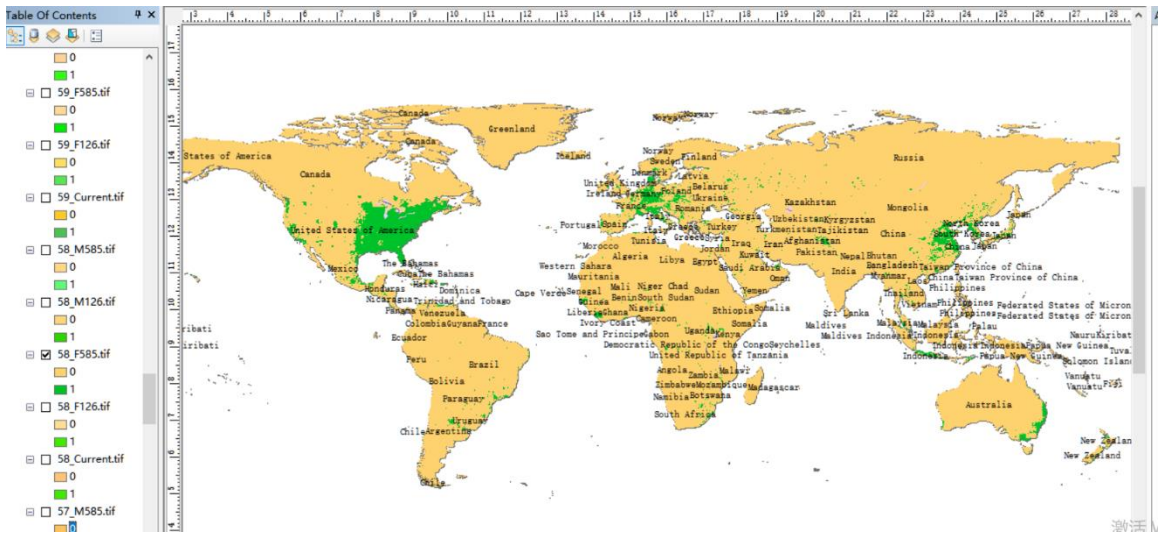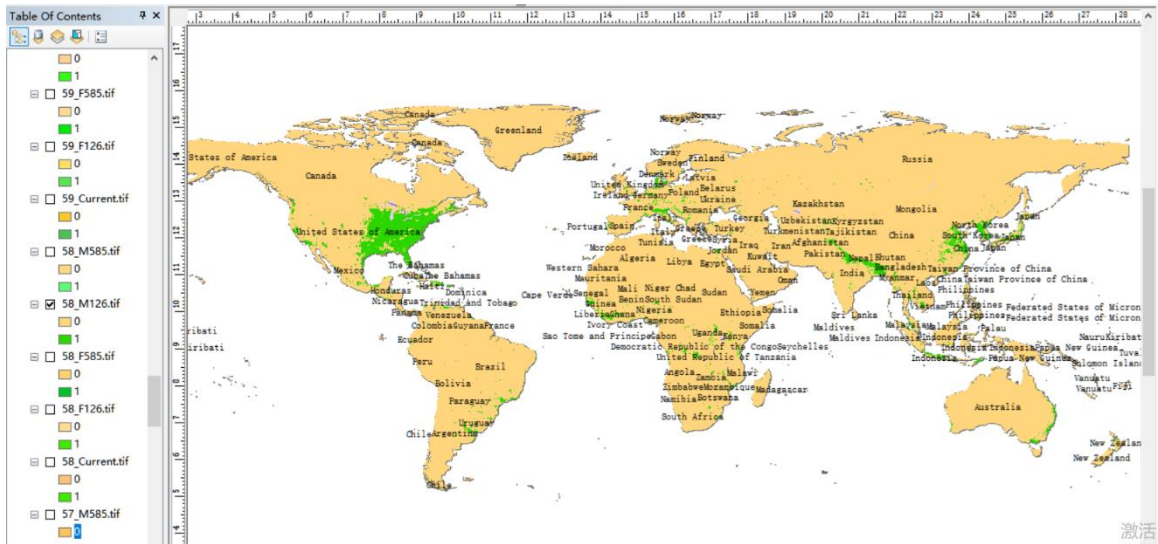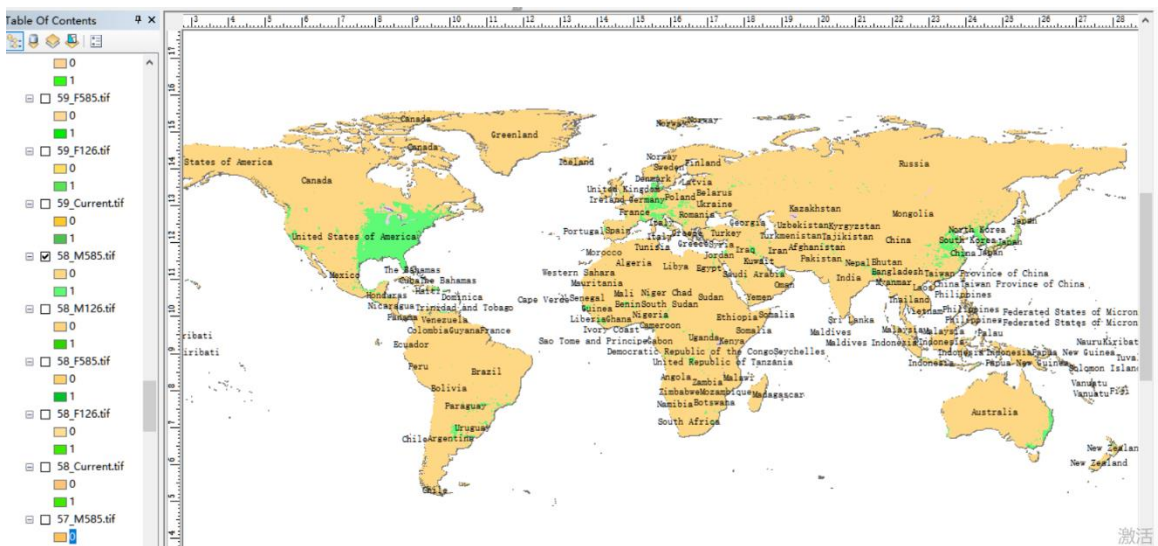

*Vespula vulgaris*

Current, F126, F585, M126 and M585 in this order

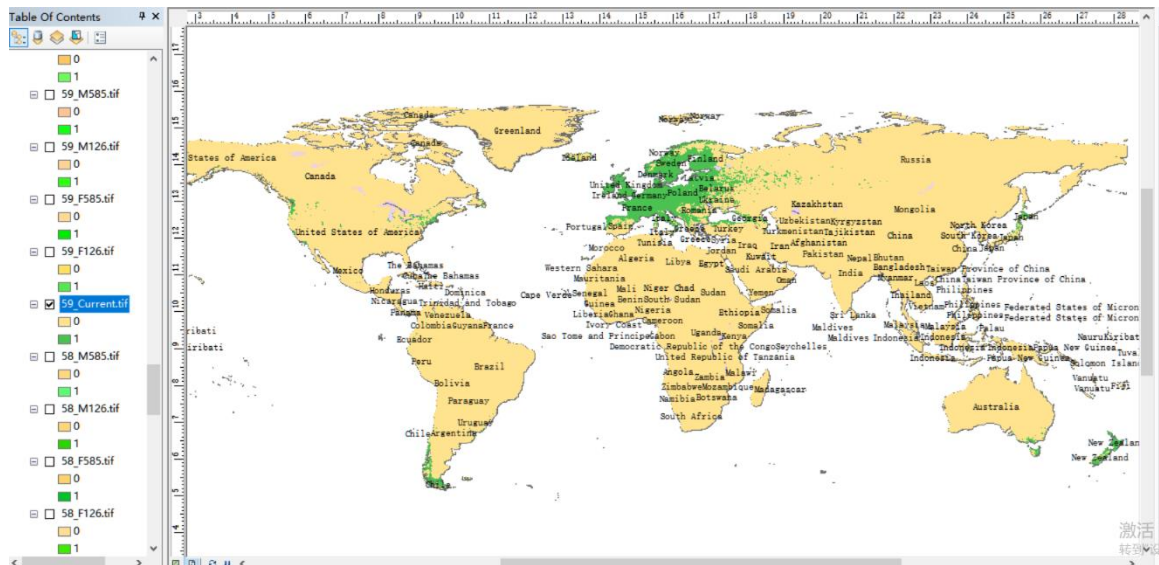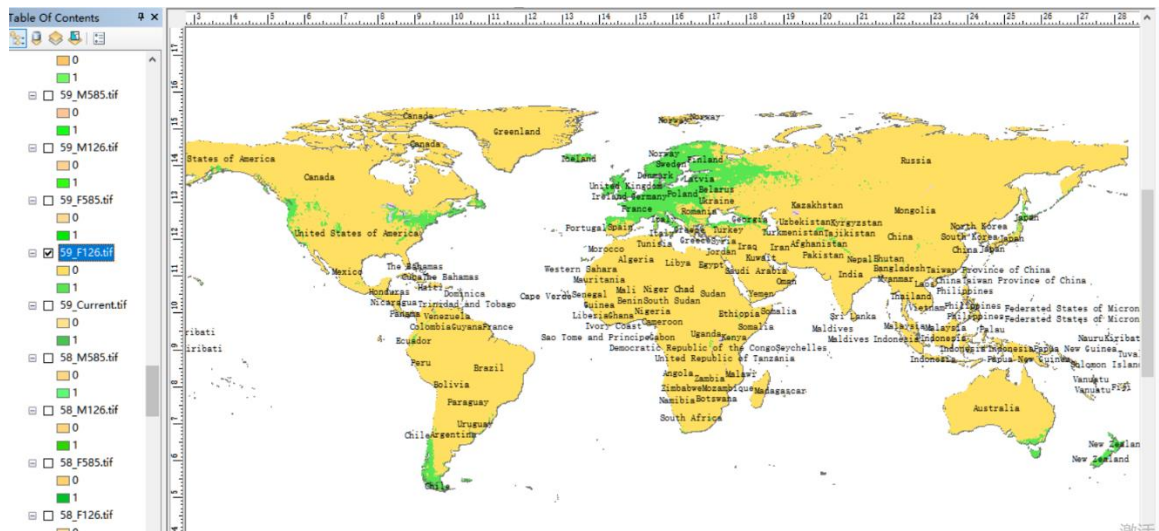



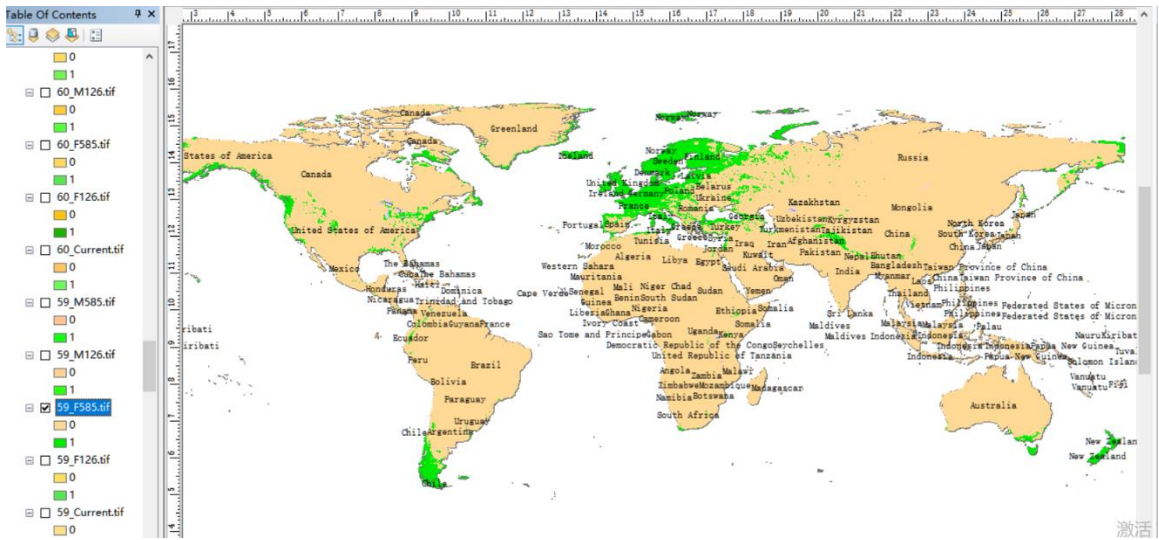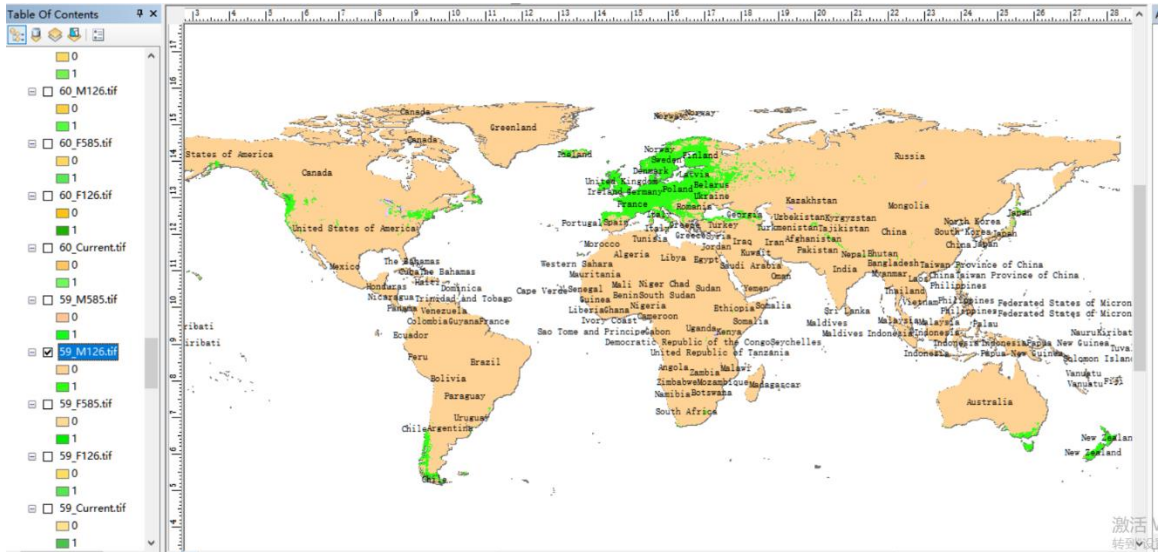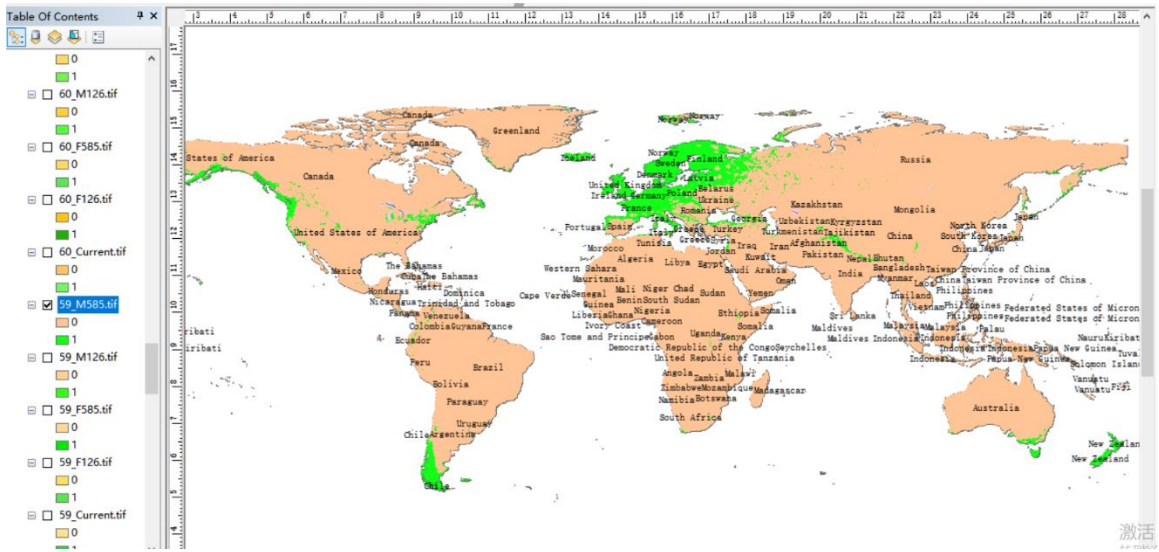

*Anoplolepis gracilipes*

Current, F126, F585, M126 and M585 in this order

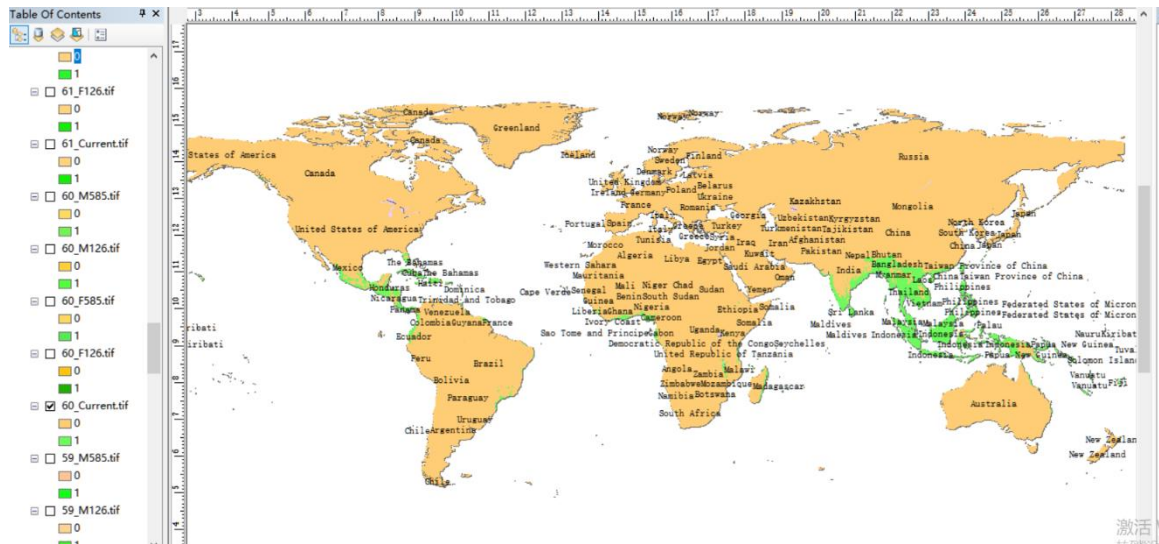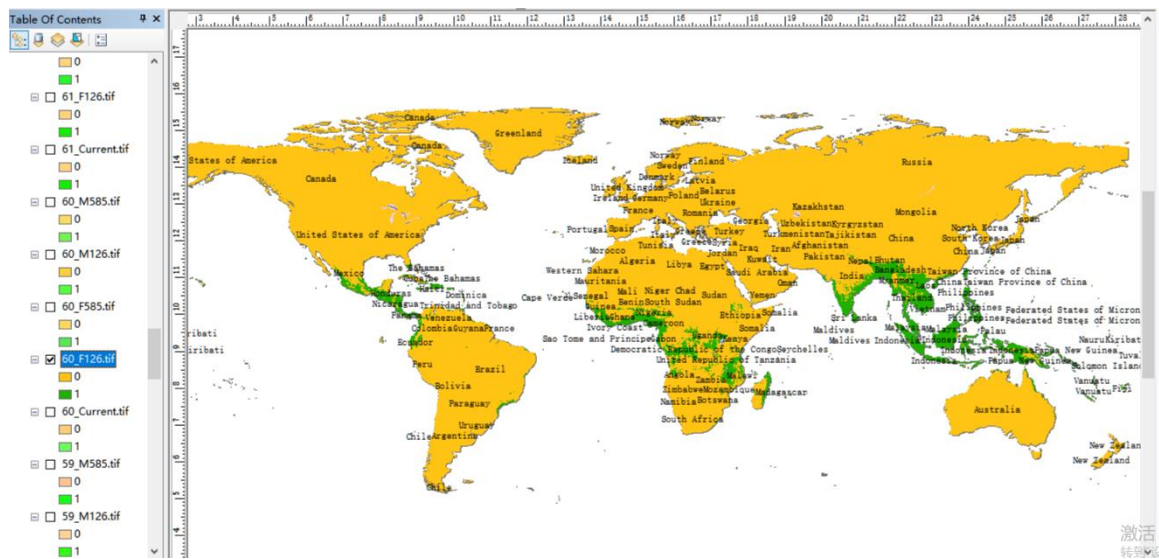

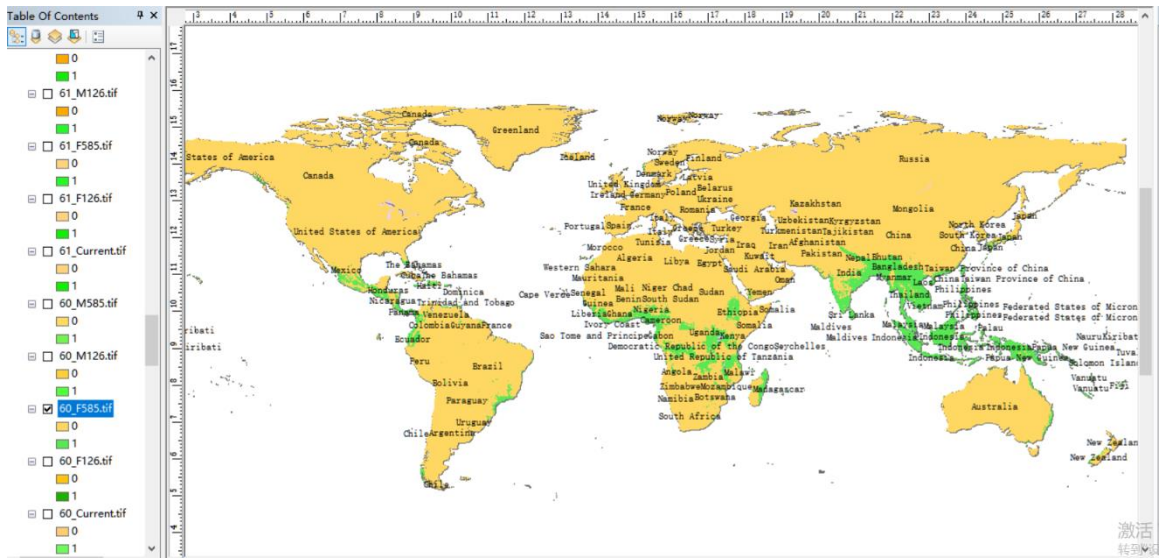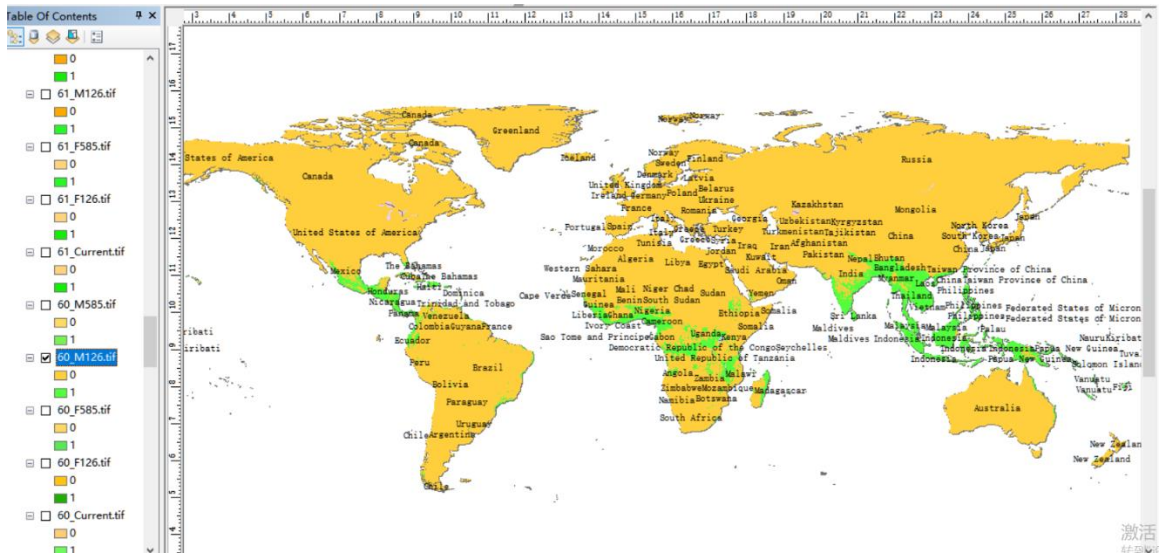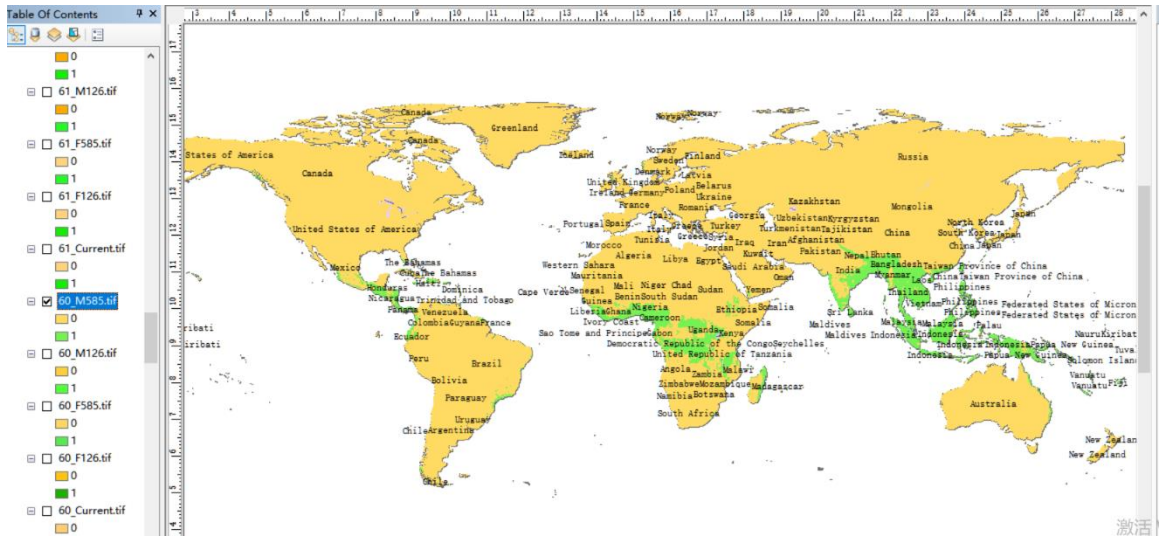



*Cinara cupressi*

Current, F126, F585, M126 and M585 in this order

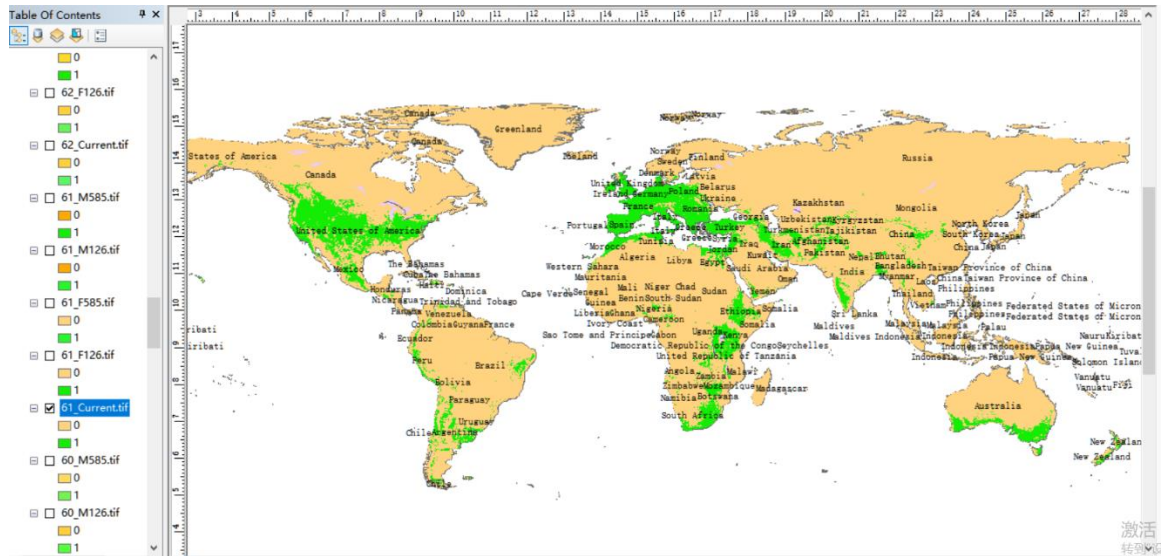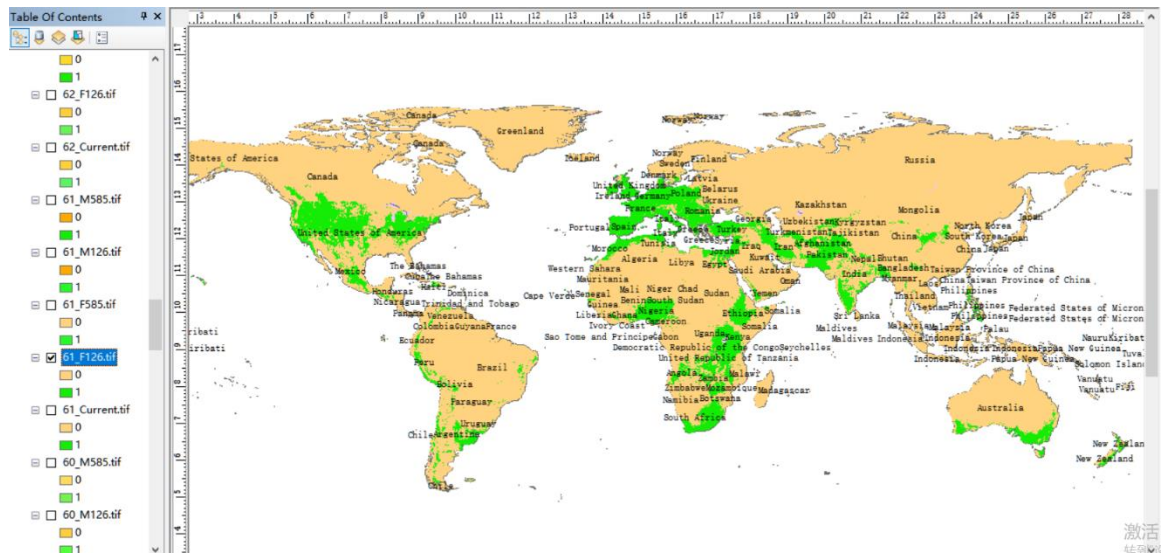

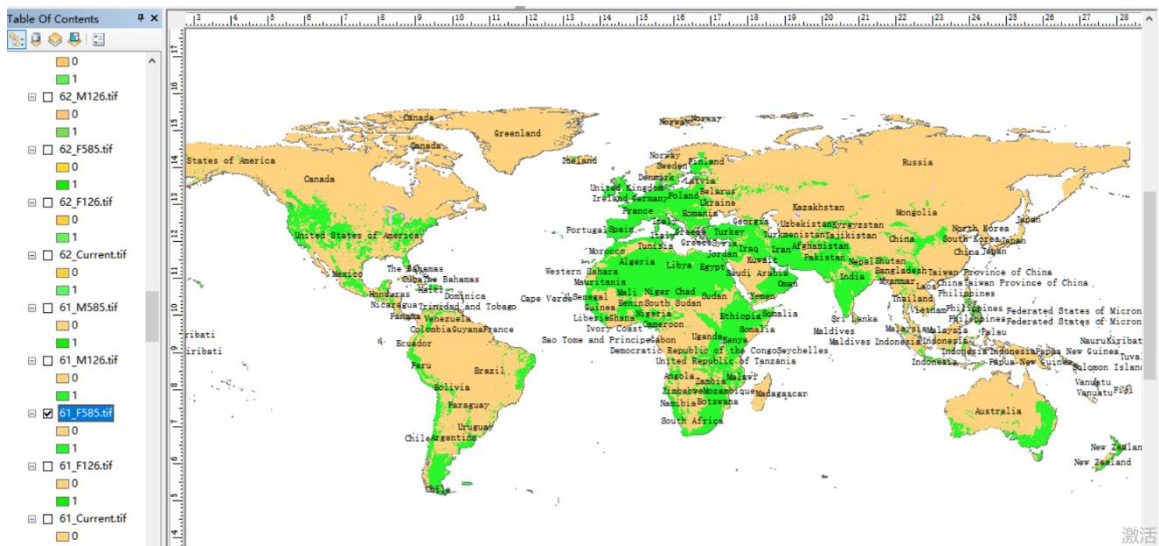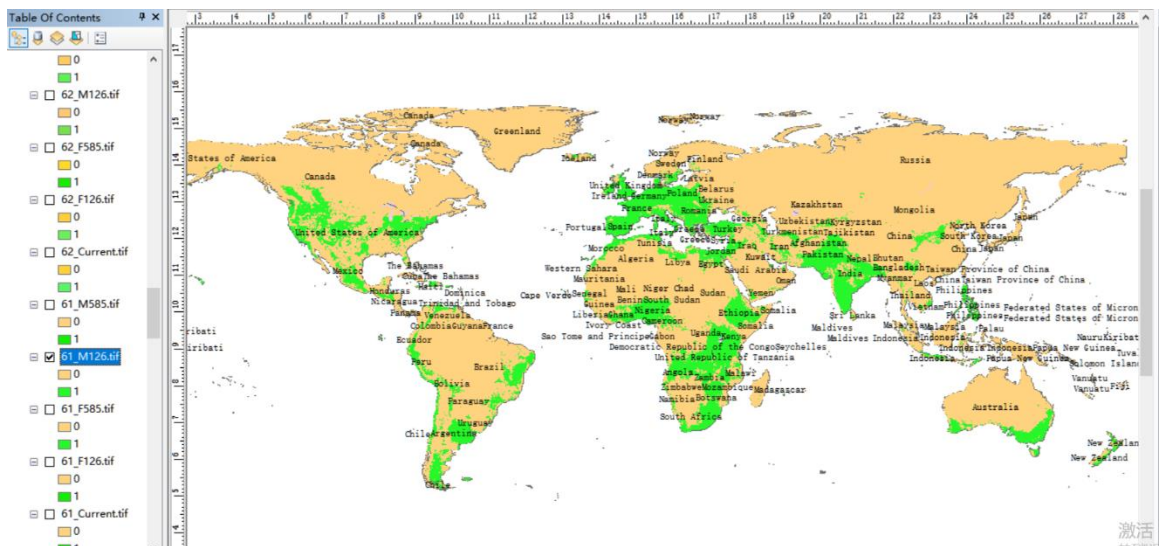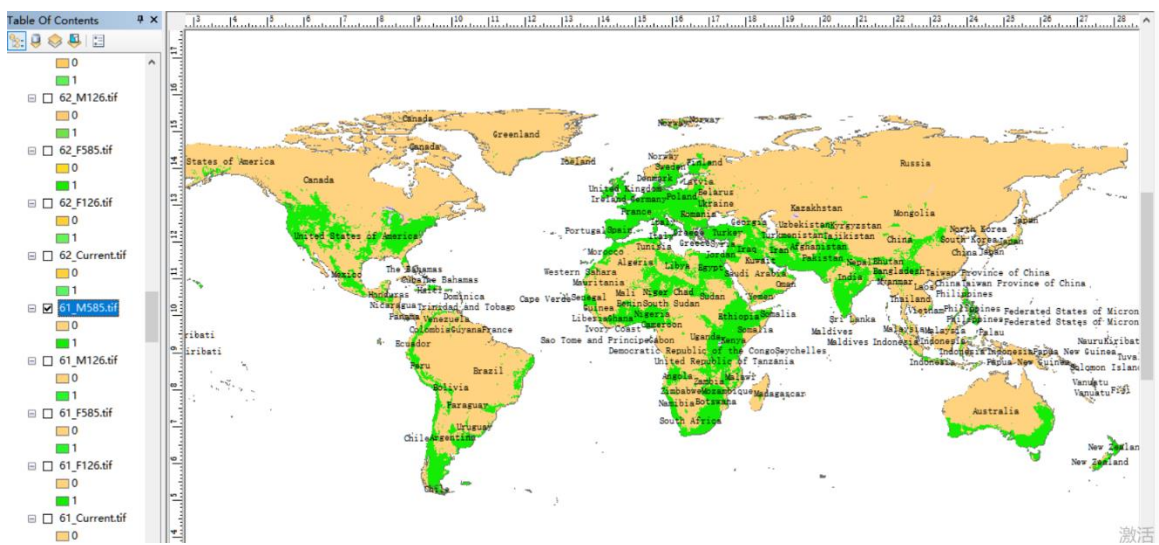

*Platydemus manokwari*

Current, F126, F585, M126 and M585 in this order

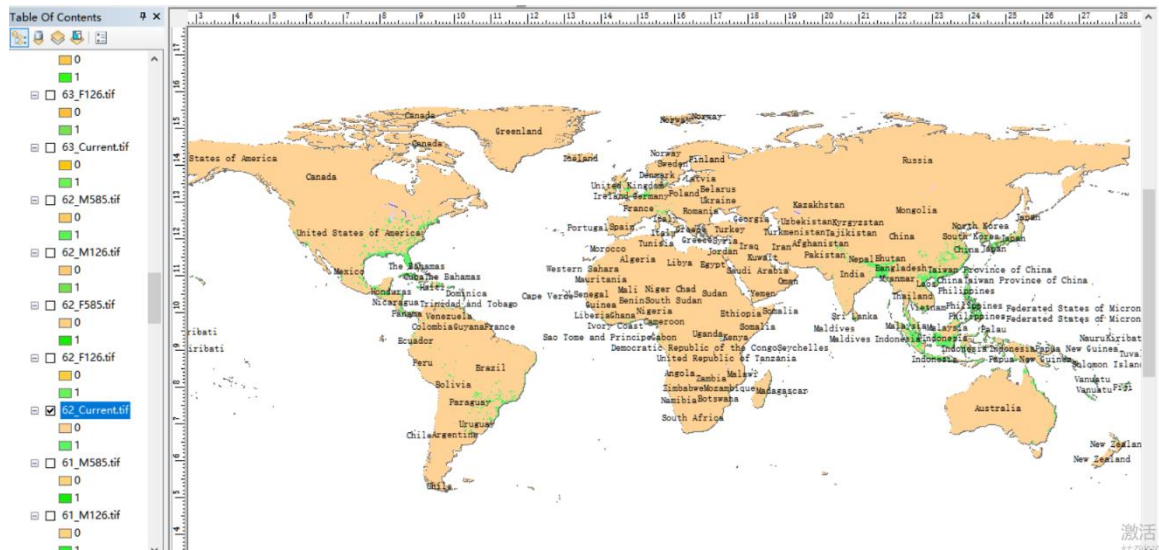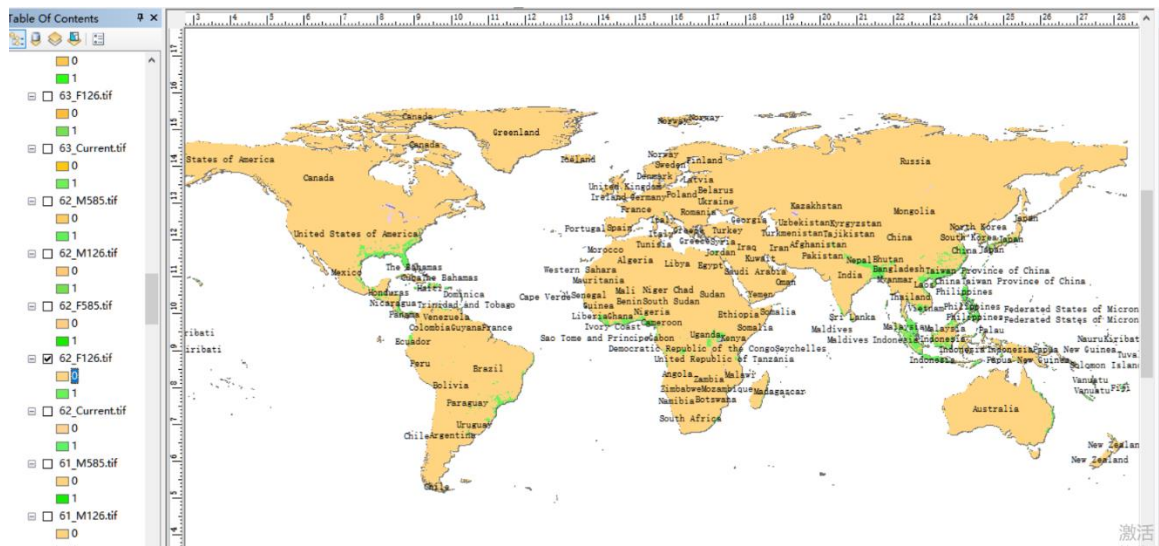



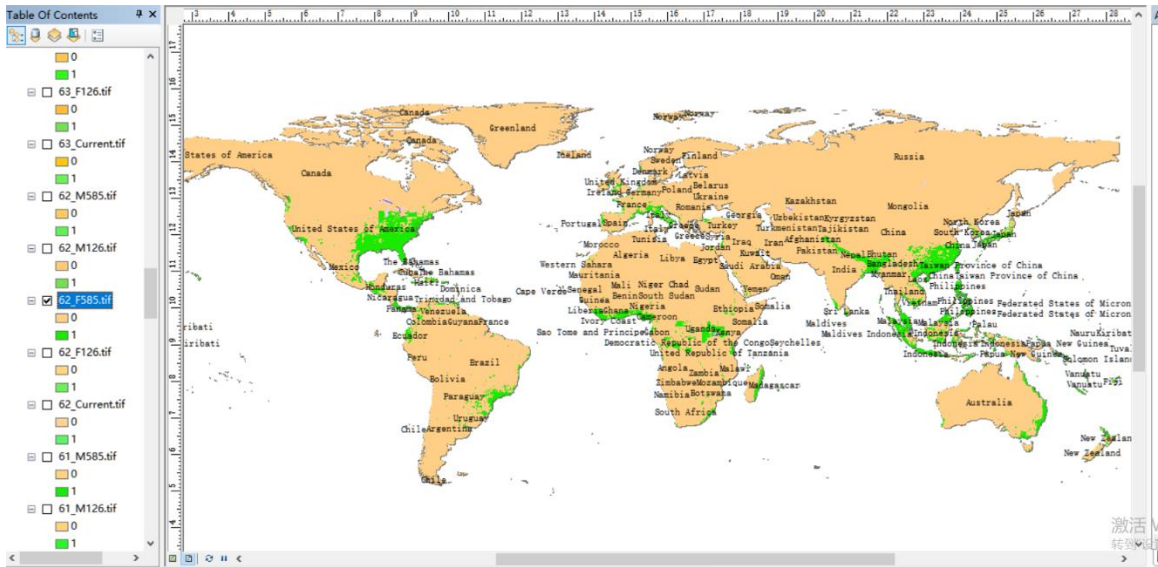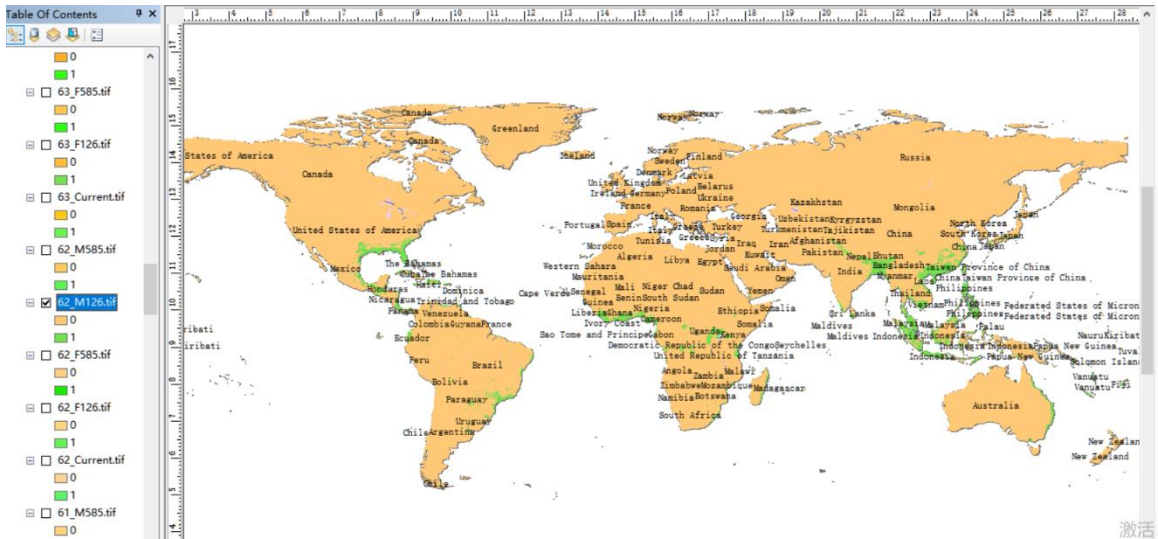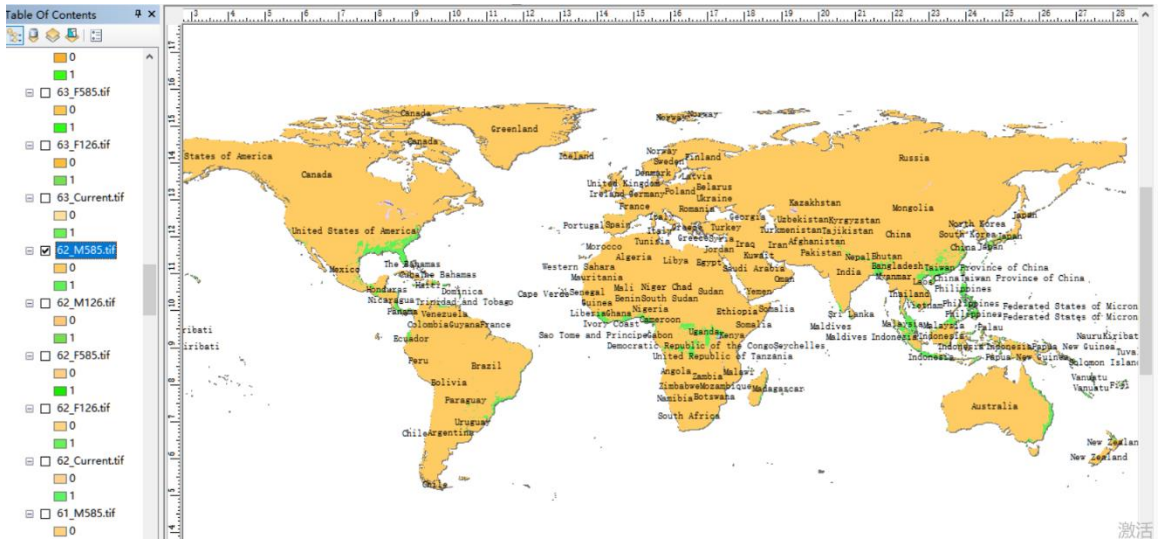

*Coptotermes formosanus shiraki*      Current, F126, F585, M126 and M585 in this order

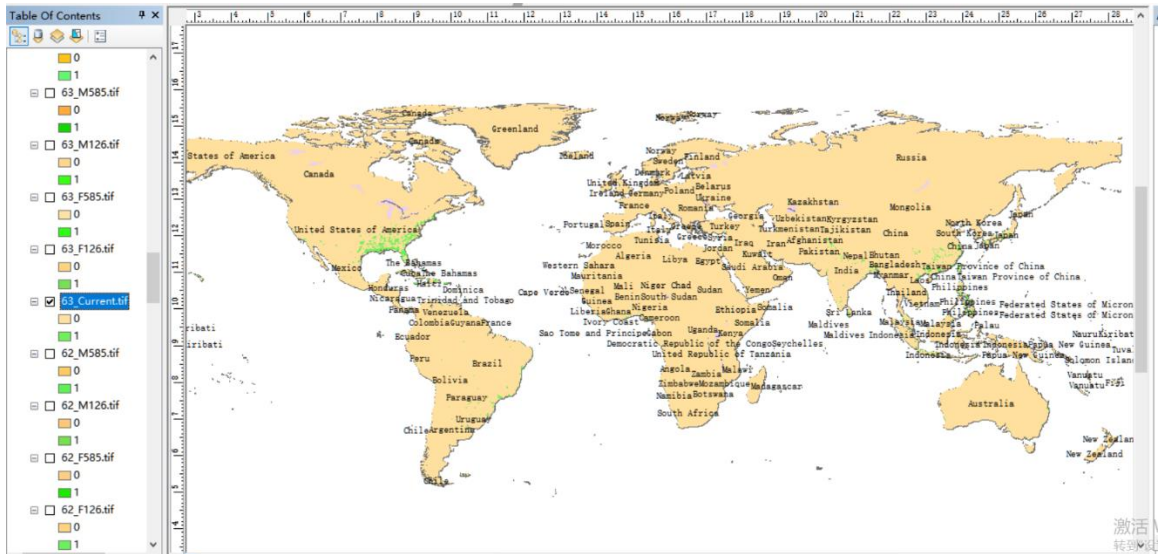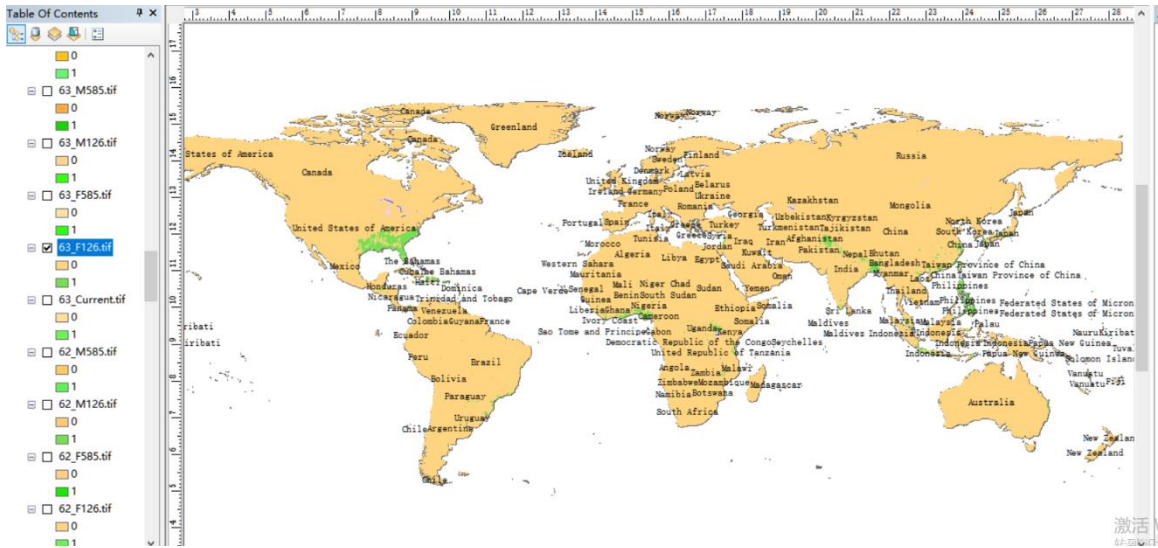

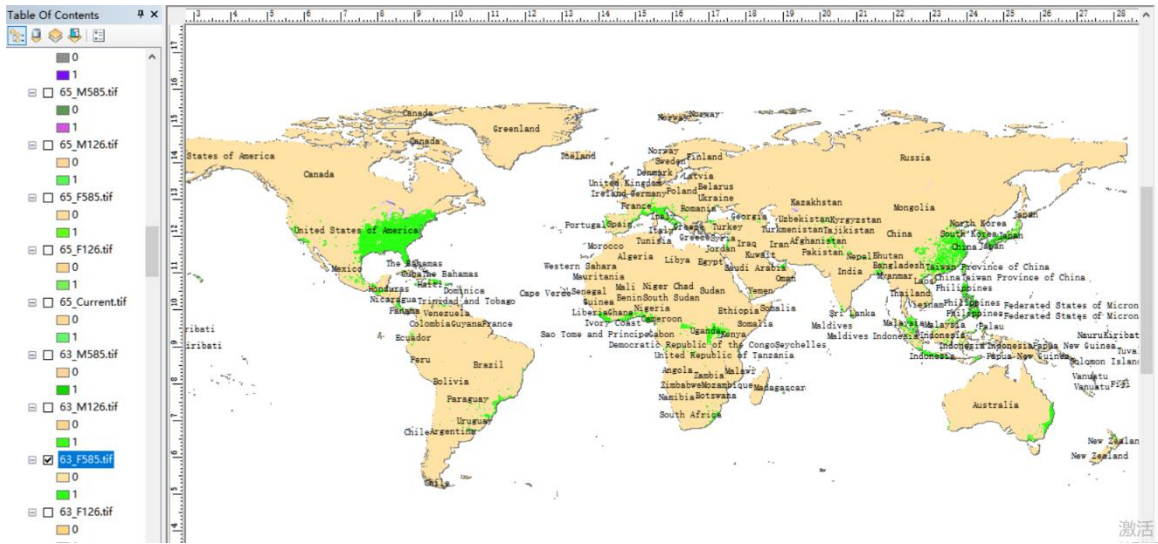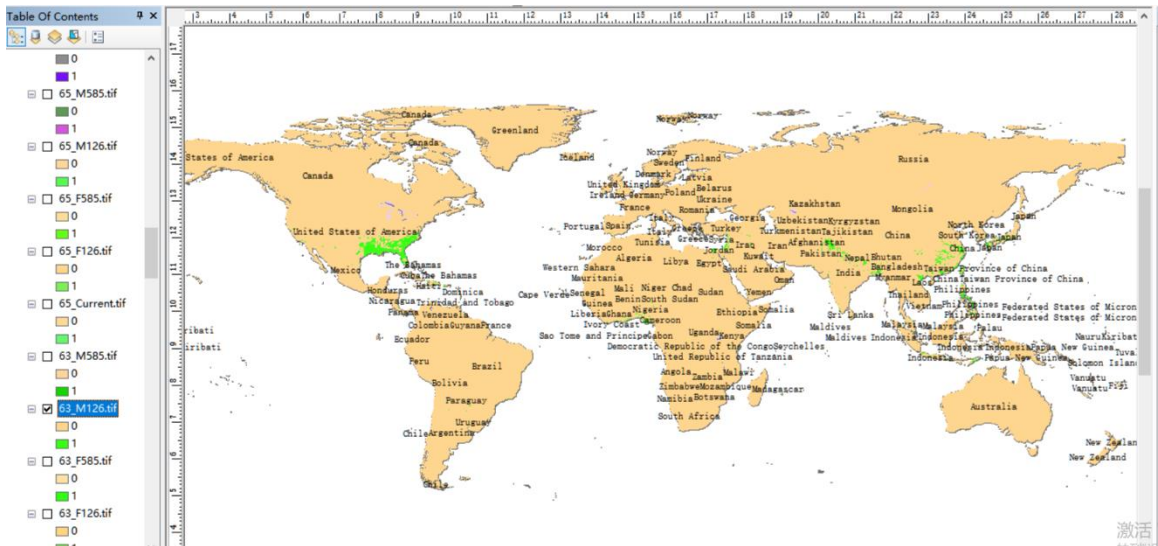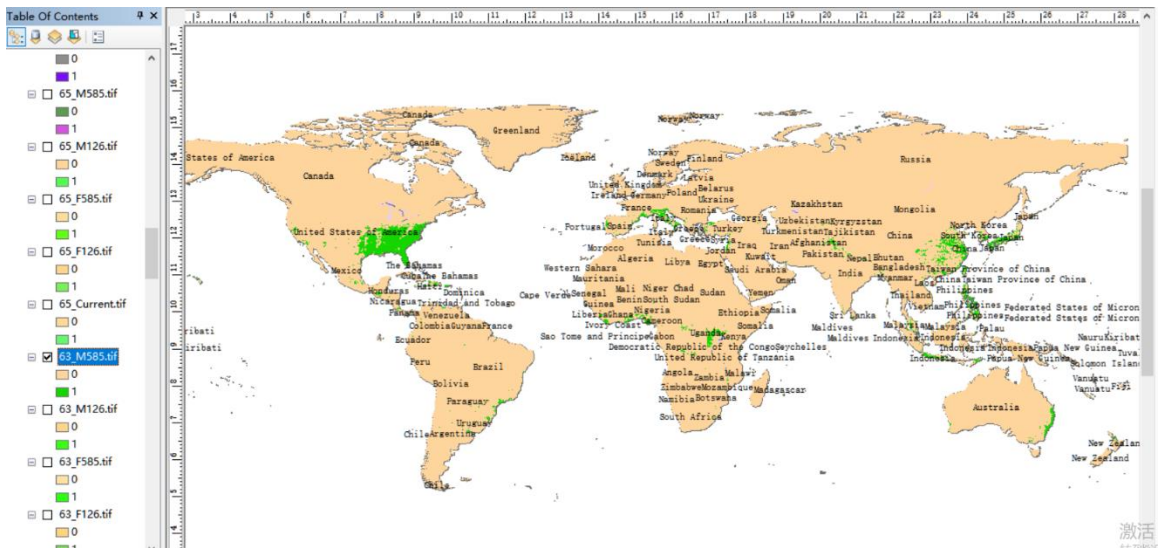



*Lymantria dispar*

Current, F126, F585, M126 and M585 in this order

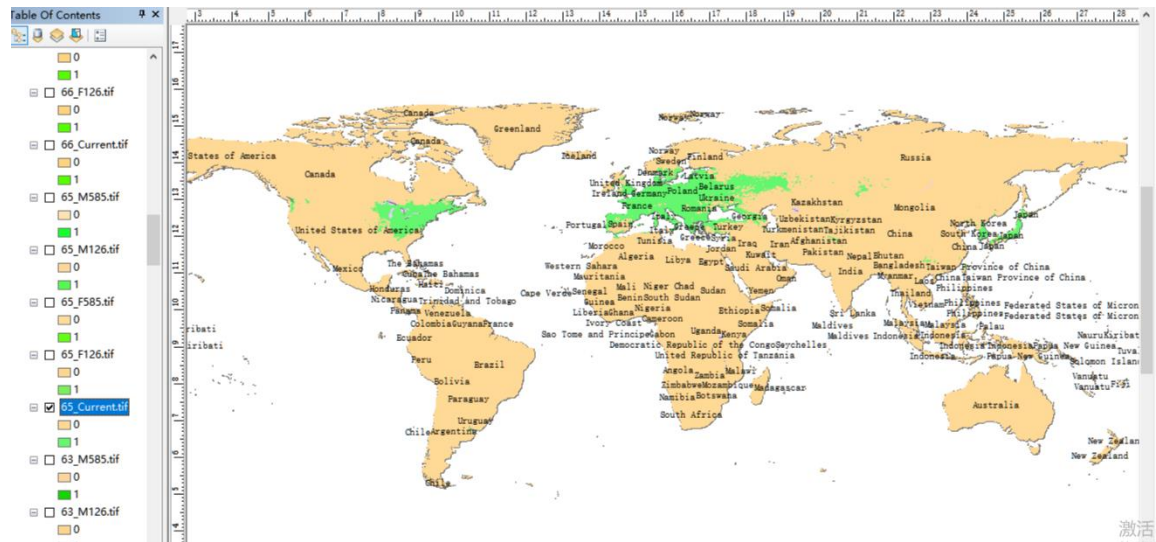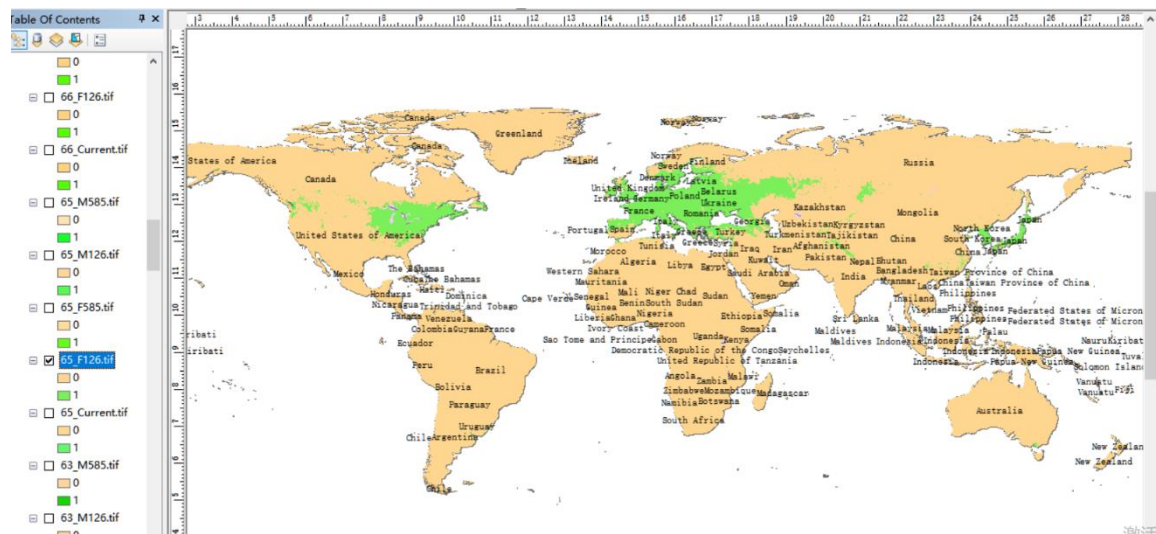

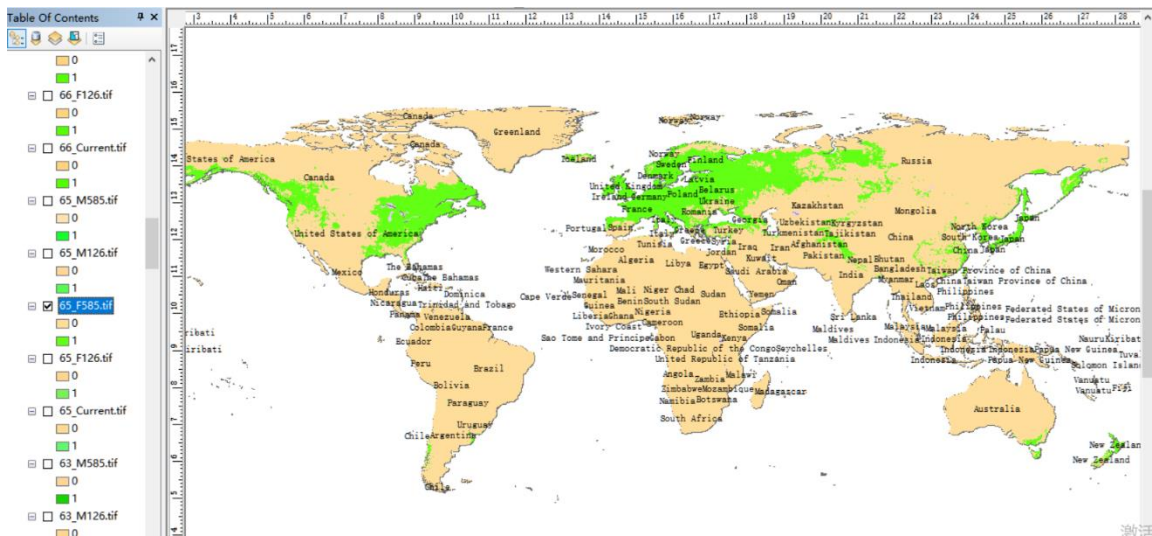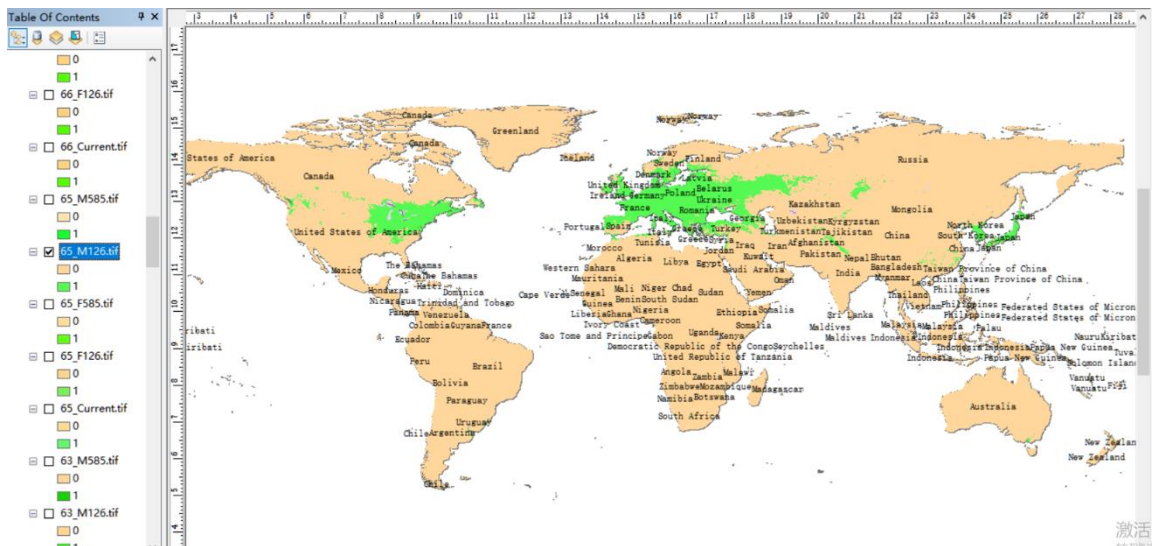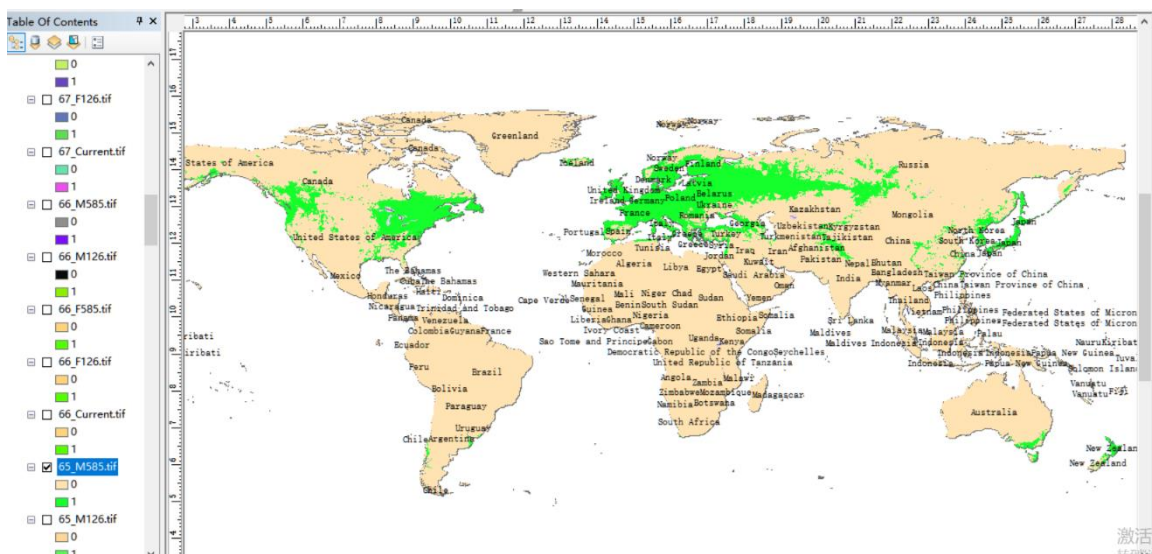

*Trogoderma granarium*

Current, F126, F585, M126 and M585 in this order

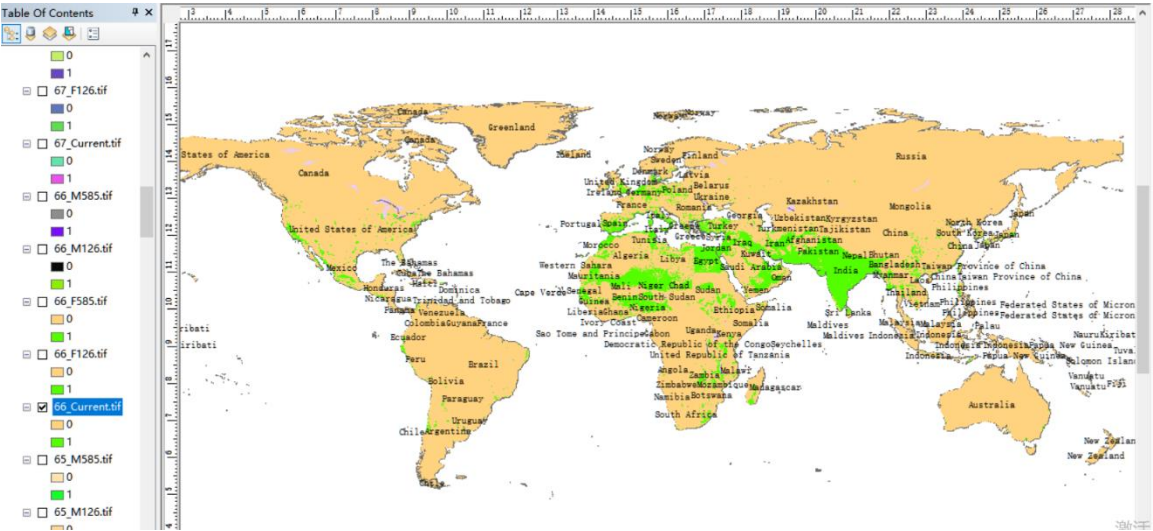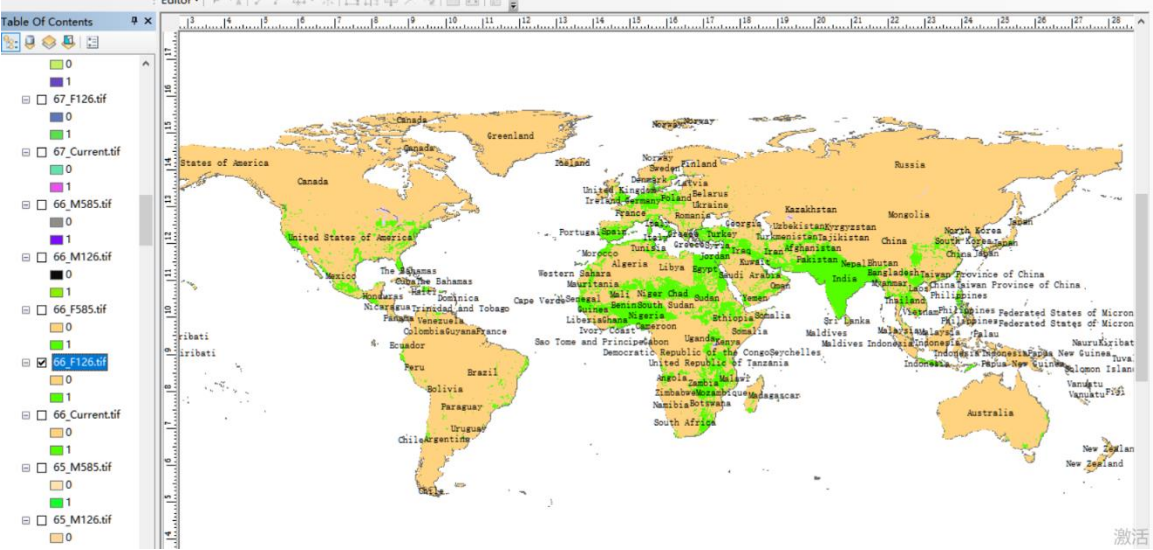



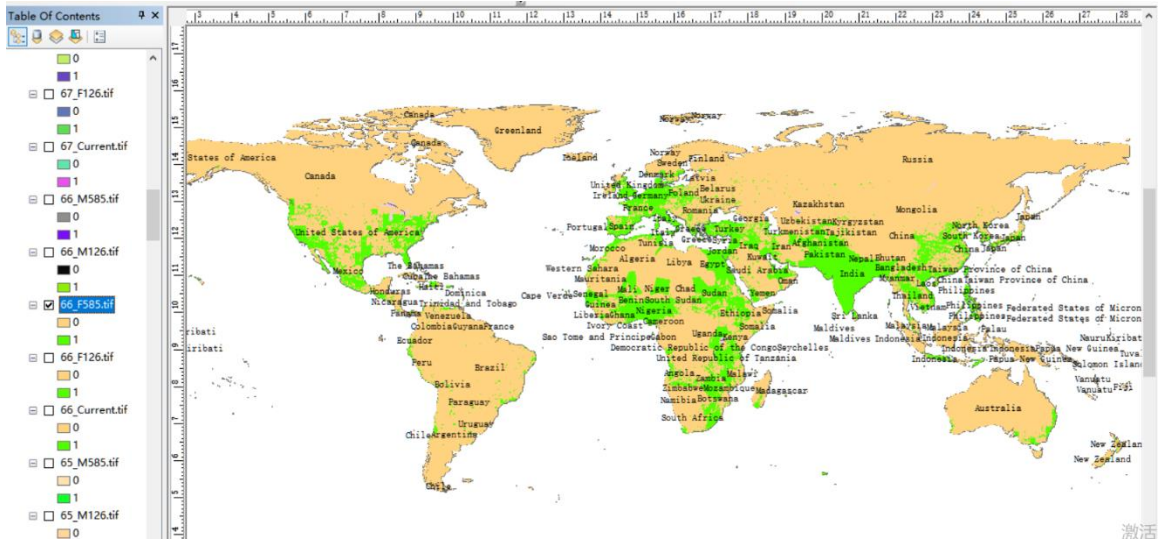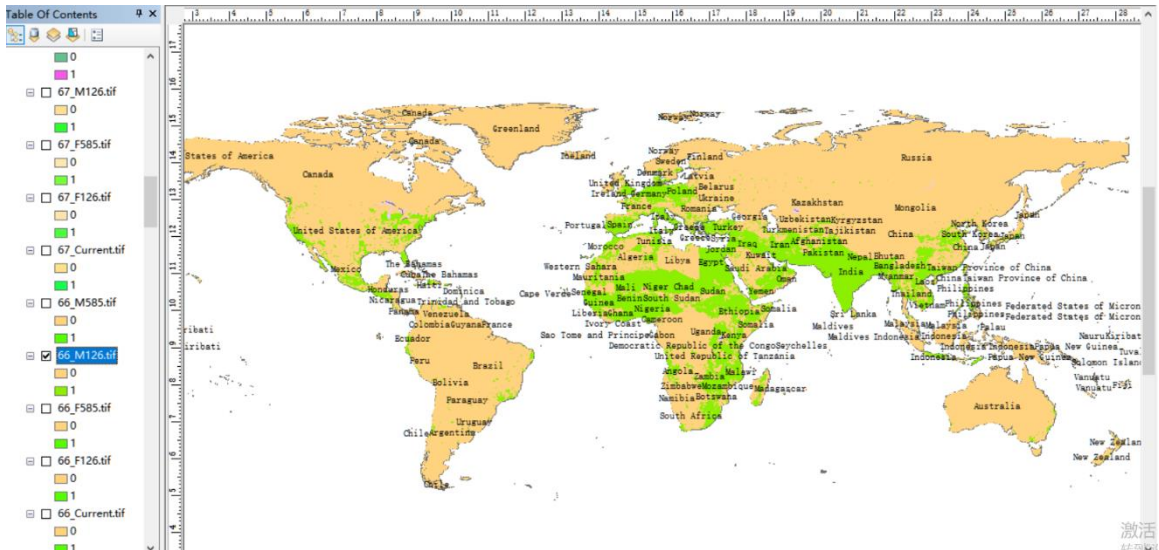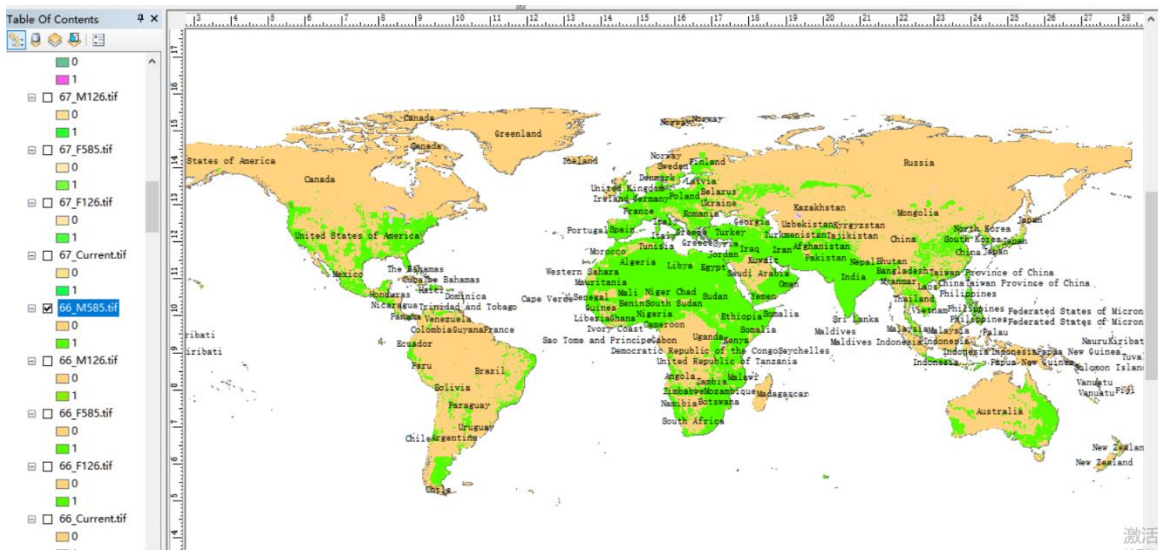

*Wasmannia auropunctata*

Current, F126, F585, M126 and M585 in this order

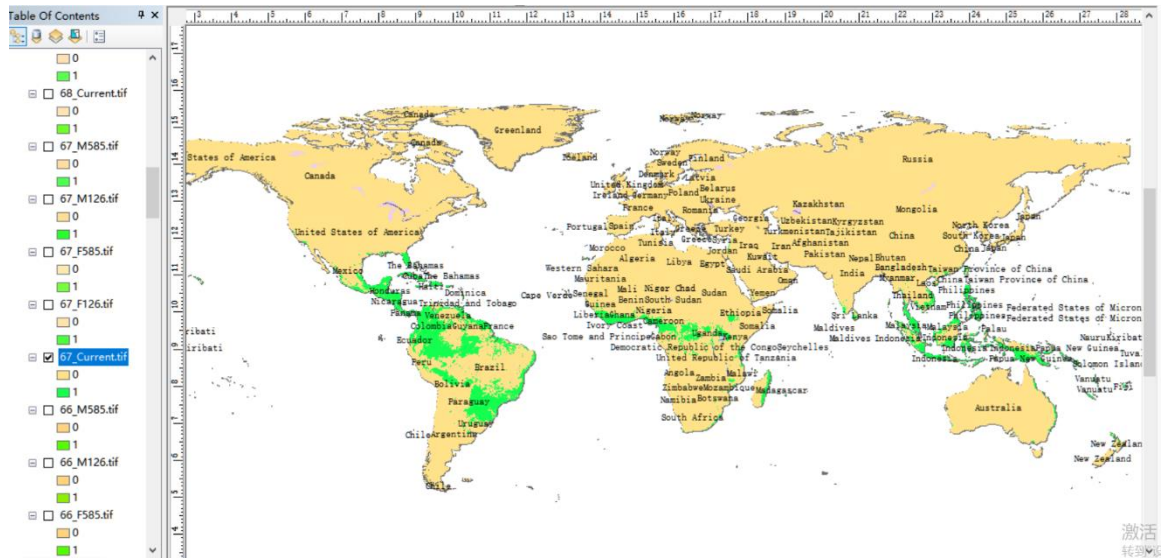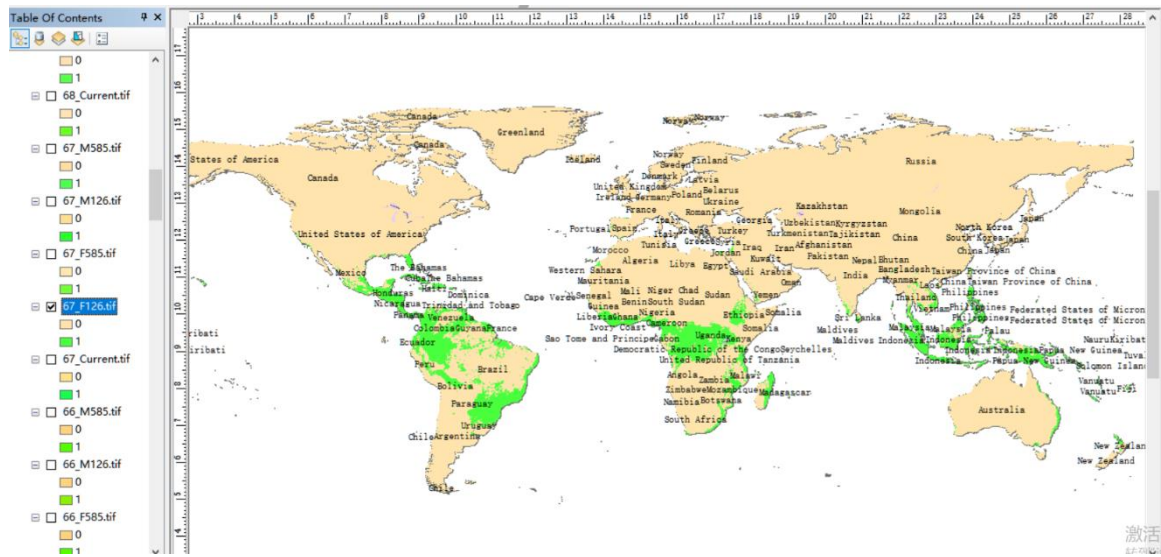

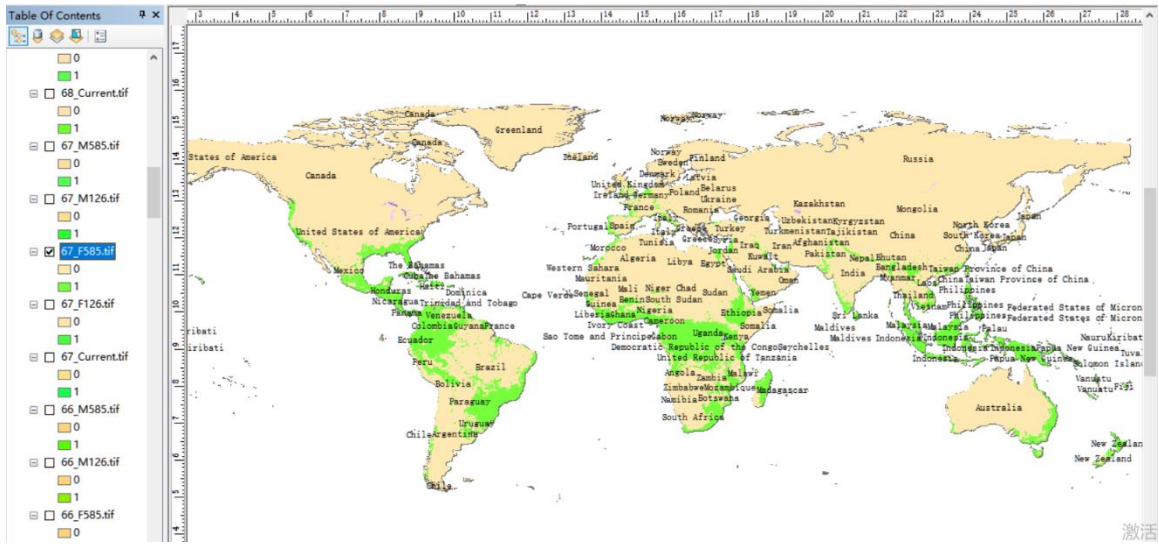

激活

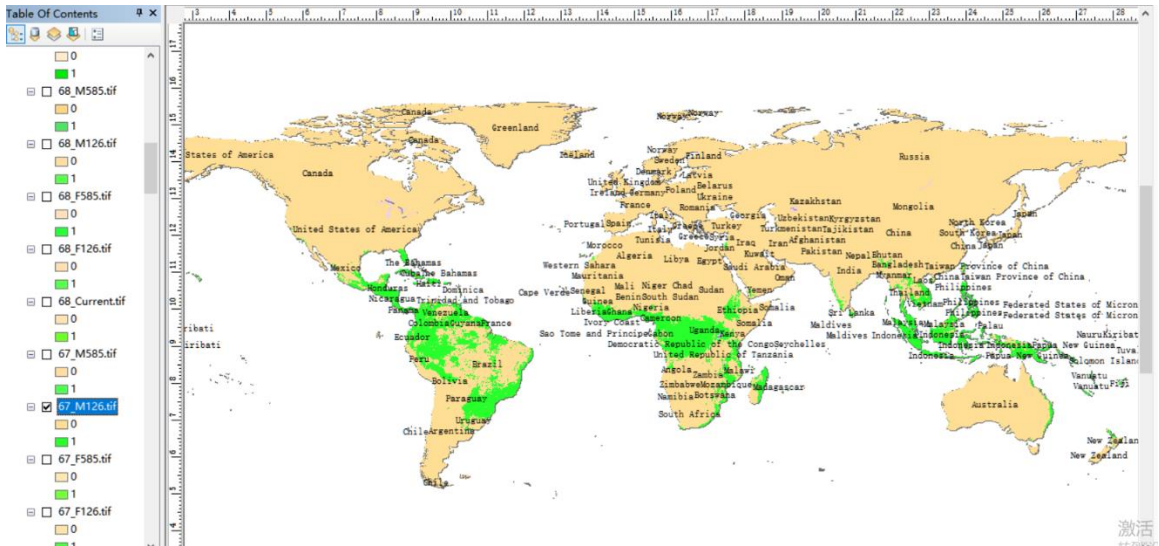

激活

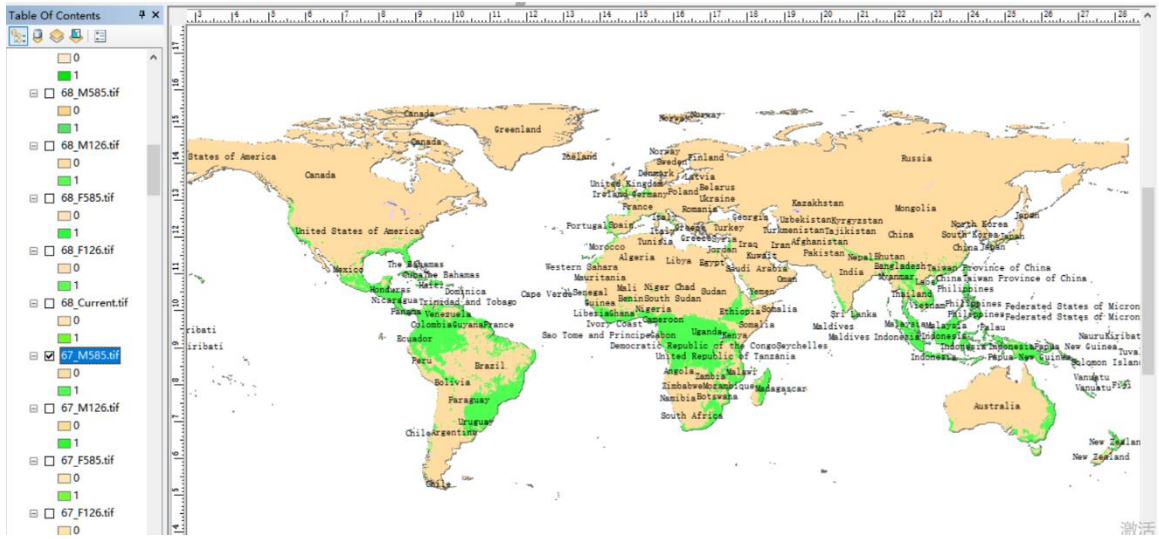

激活



*Solenopsis invicta*

Current, F126, F585, M126 and M585 in this order

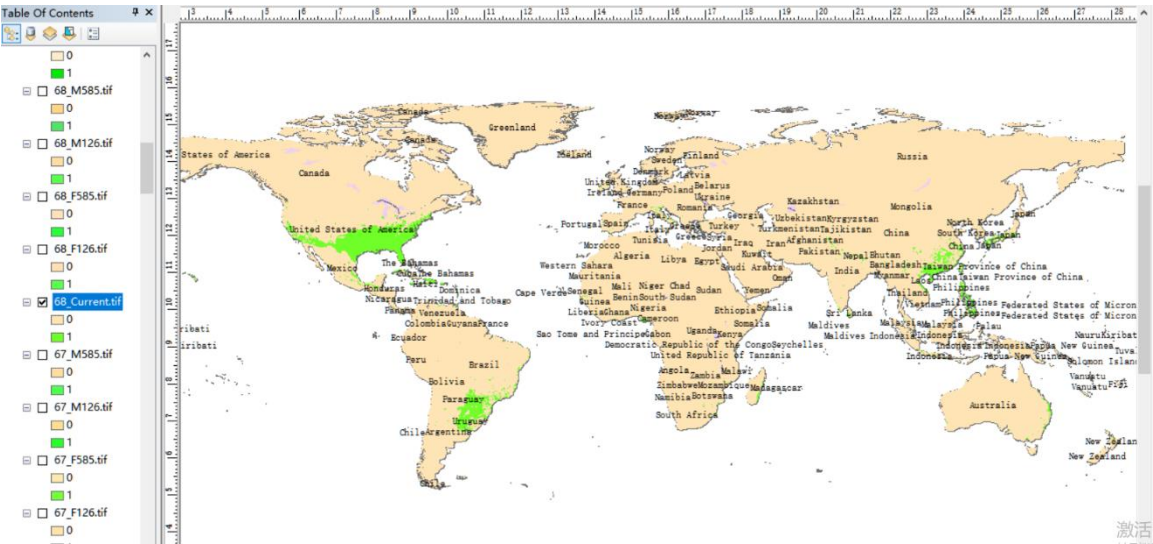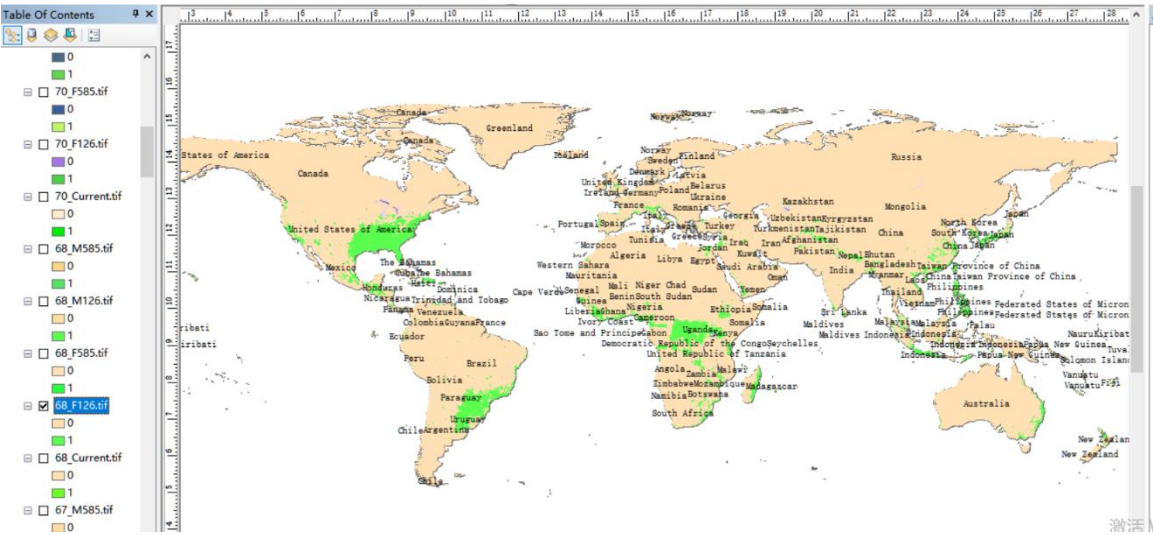

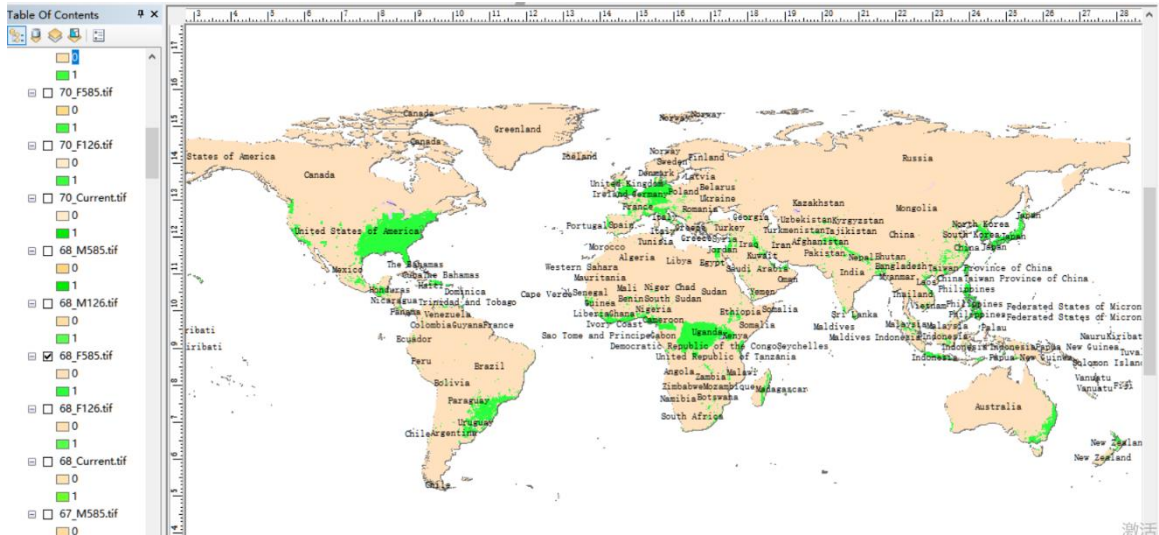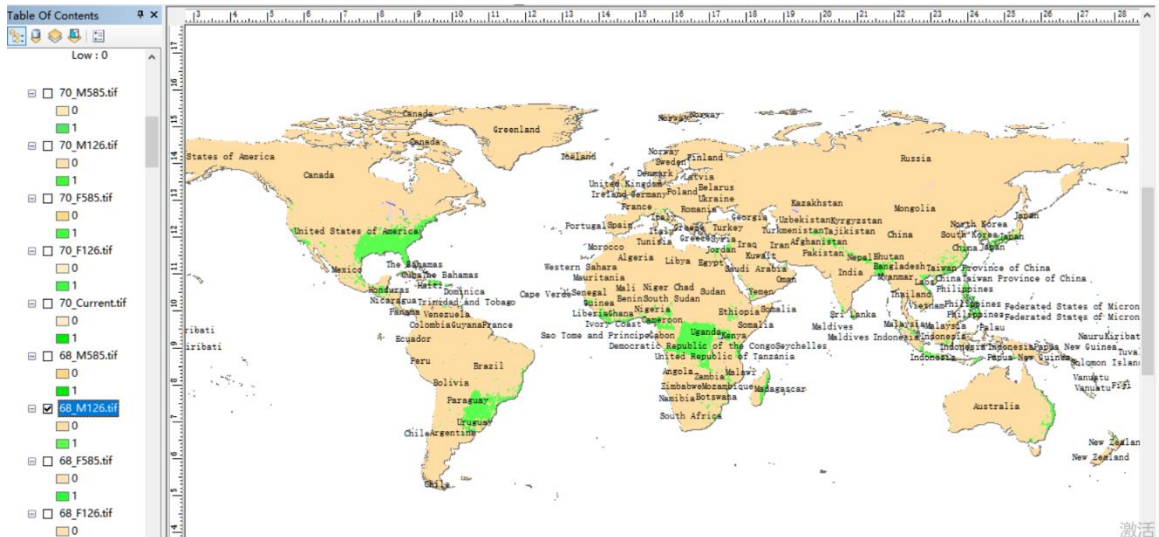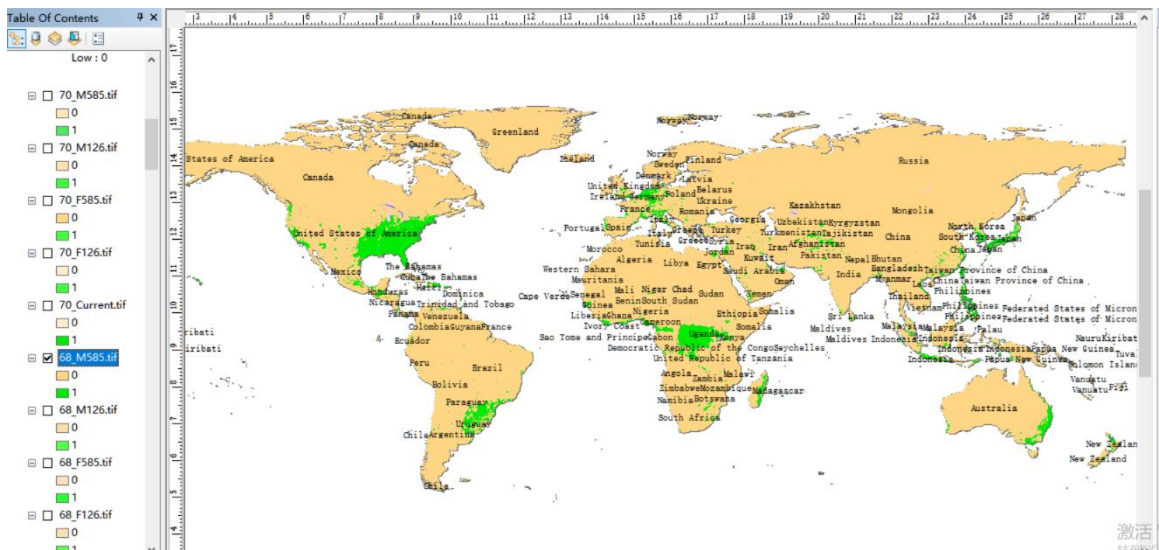

*Bemisia tabaci*

Current, F126, F585, M126 and M585 in this order

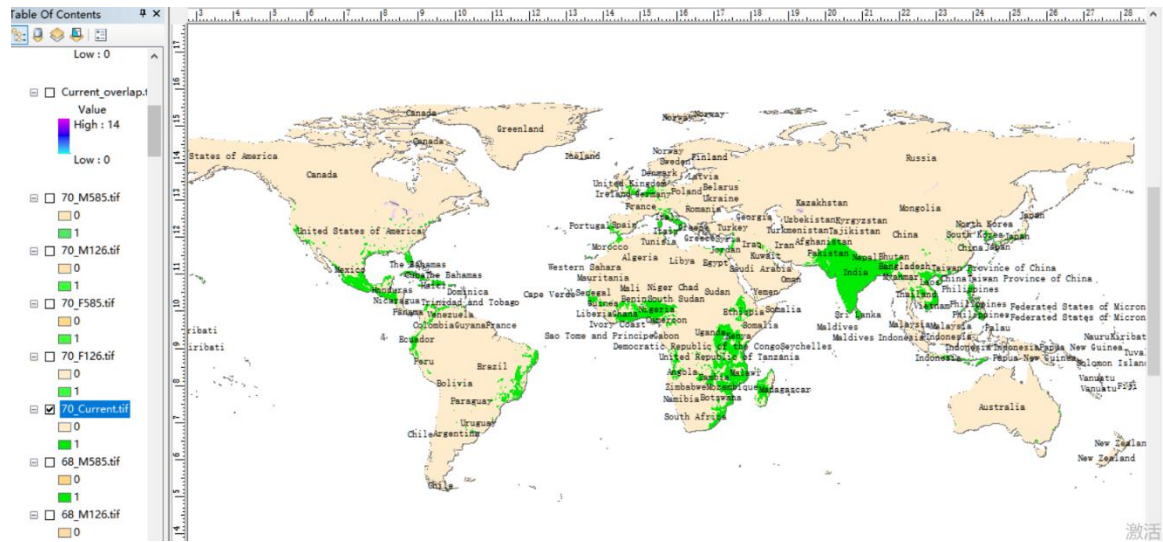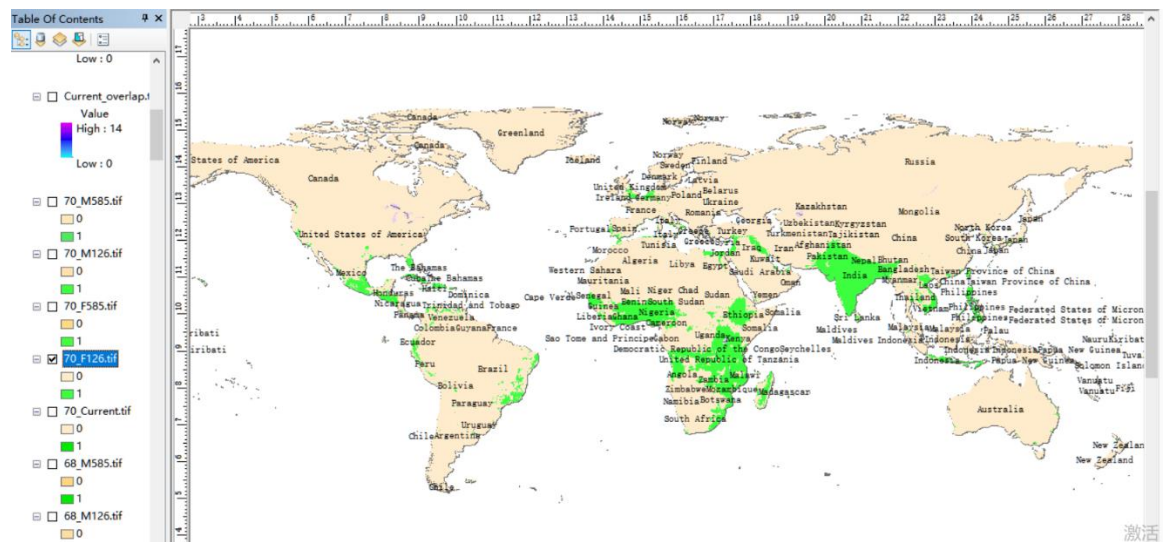



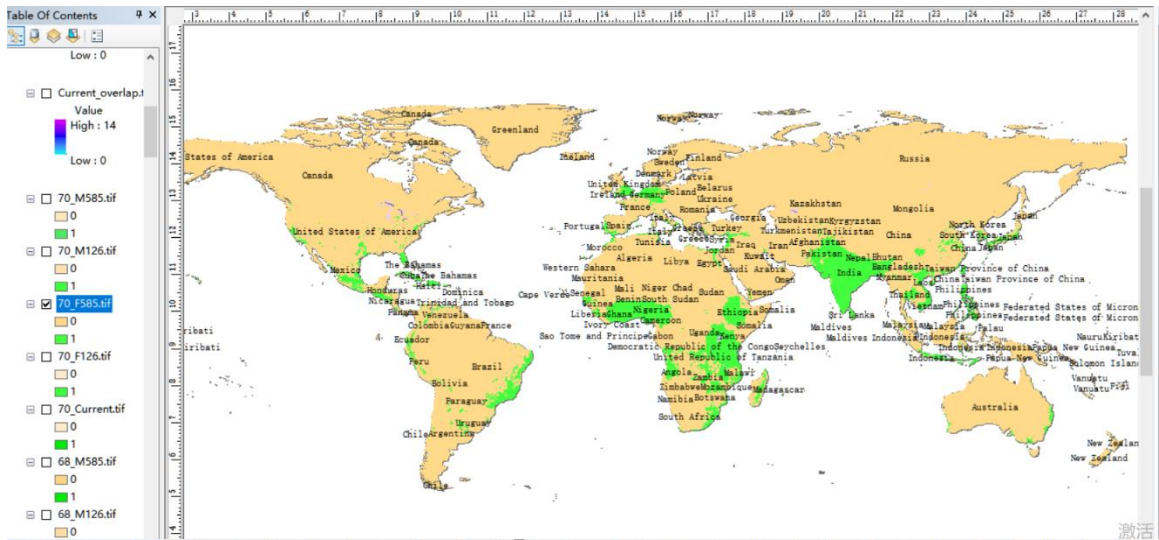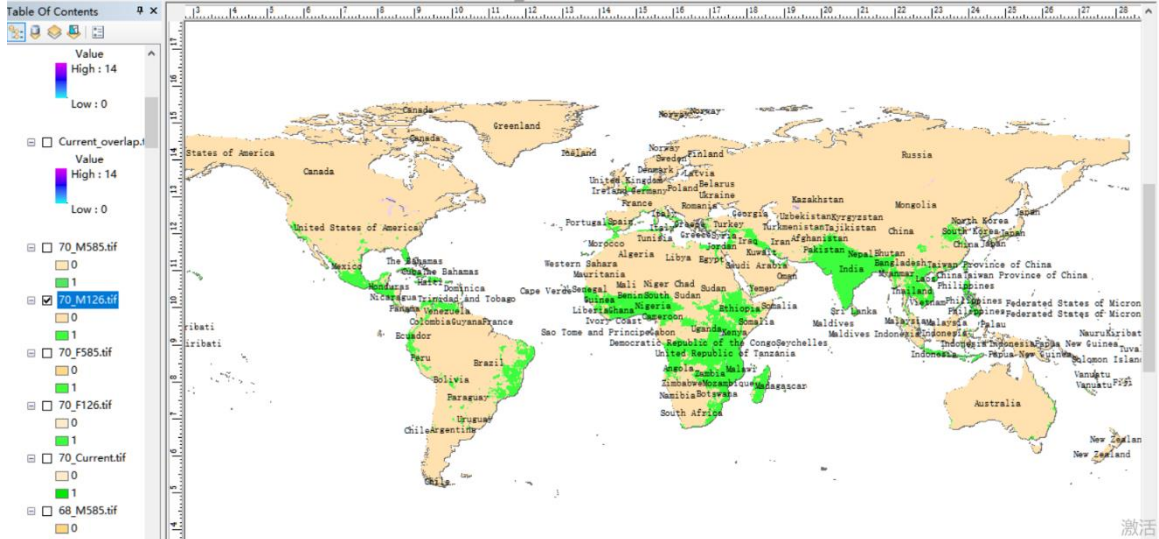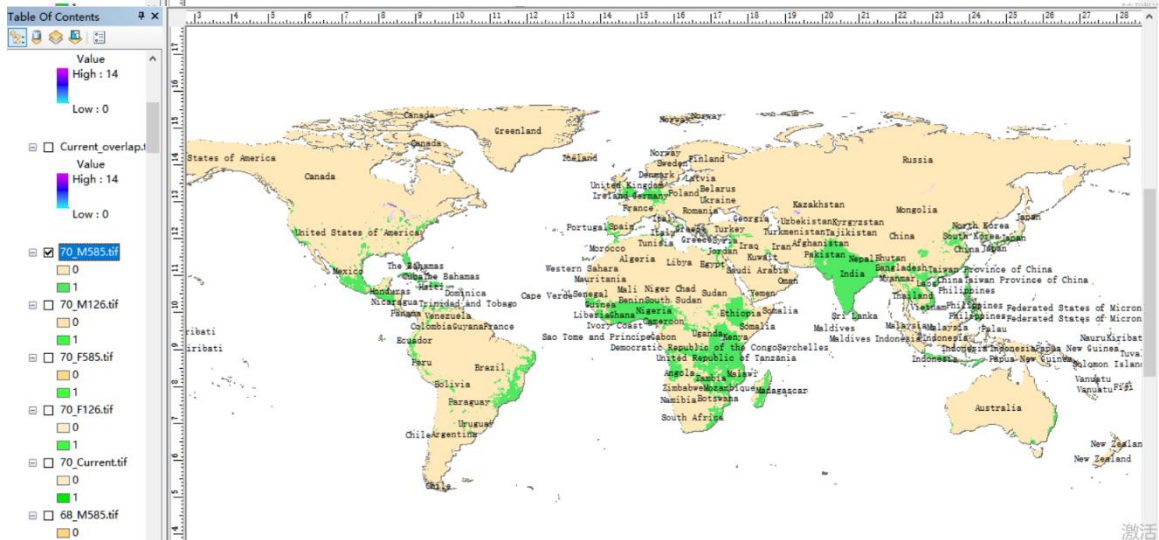

Supplement: s1 [file s1]
