# Supplementary material for: Future Climate Change and Anthropogenic Disturbance Promote the Invasions of the World’s Worst Invasive Insect Pests
Source: MDPI journal article supplement (doi:10.3390/insects15040280), 2024-04-16
Supplement: s1 [file s1]

### S3 Methods for parameterization in the models

We used importance values (through jackknifing method) and multi-collinearity diagnosis (through Pearson correlation) to parameterize important predictors in the formal species distribution models for each species individually. For example, for *Platydemus manokwari*, its important predictors in our species distribution models included UR, B18, b11, PR, B17, B10, EL, PO, B2, SF, PA, PN, CR, SL, SN, AS and RA, while for *Anoplophora glabripennis*, they were UR, PO, B3, CR, B6, CR, B15, B5, B2, RA, B16, SL, PR, SF, SN, AS, PN, PA and RA. We used true skill statistic (TSS) and area under the curve (AUC) to parameterize algorithms which were not suitable to predict potential range of each species individually. Therefore, different species might have different algorithms to project their potential ranges. For example, for *Anoplophora glabripennis*, the included algorithms were CTA, FDA, GBM, GLM, MARS, MAXENT, RF and XGBOOST while for *Linepithema humile*, they were ANN, CTA, FDA, GBM, GLM, MARS, MAXENT, RF and XGBOOST. The amounts of pseudo-absences (PAs) were parameterized through the amounts of species occurrence records for each species individually, i.e., 1000 PAs if the occurrence records being less than 1000, or equal amounts of PAs being randomly generated. For example, for *Linepithema humile*, *Anoplophora glabripennis*, *Aedes albopictus* and *Pheidole megacephala*, they had 1247, 1000, 8009 and 681 PAs, respectively. To parameterize assembled projection of each species individually, we used weights equaling to TSS of the species distribution models derived by each algorithm. For example, for *Anoplophora glabripennis*, projection by CTA was given the lowest weights, while for *Vespula vulgaris*, ANN was given the lowest weight. We also used the maximum sum of sensitivity and specificity (MSS) threshold to parameterize the potential ranges of each species. The key parameterizations in species distribution models for each species were listed in following table1.

Table S1 Key parameterizations in species distribution models (SDMs) for each species

| Scientific Names                 | Amounts of occurrences | Predictors in SDMs                                                                      | The number of PAs | Algorithms in SDMs                                         | Thresholds for current scenarios | Thresholds for F126 | Thresholds for F585 | Thresholds for M126 | Thresholds for M585 scenario |
|----------------------------------|------------------------|-----------------------------------------------------------------------------------------|-------------------|------------------------------------------------------------|----------------------------------|---------------------|---------------------|---------------------|------------------------------|
| <i>Aedes albopictus</i>          | 8009                   | B11, PO, UN, B10, B12, EL, PA, PR, B14, CR, SL, RA, B2, B8, B19, SN, B18, PN, SF, AS    | 8009              | CTA, FDA, GBM, GLM, MARS, MAXENT, MAXNET, RF, XGBOOST      | 0.53                             | 0.56                | 0.42                | 0.55                | 0.43                         |
| <i>Anopheles quadrimaculatus</i> | 569                    | UN, PO, B3, B6, CR, B15, B5, B2, RA, B16, SL, PR, SF, SN, AS, PN, PA                    | 1000              | CTA, FDA, GBM, GLM, MARS, MAXENT, MAXNET, RF, XGBOOST      | 0.405                            | 0.26                | 0.32                | 0.25                | 0.27                         |
| <i>Anoplolepis gracilipes</i>    | 660                    | B4, PO, B18, B8, B13, UN, B2, RA, SL, PR, PA, EL, B15, CR, B19, PN, SF, AS, SN          | 1000              | ANN, CTA, FDA, GBM, GLM, MARS, MAXENT, MAXNET, RF, XGBOOST | 0.54                             | 0.64                | 0.46                | 0.57                | 0.61                         |
| <i>Anoplophora glabripennis</i>  | 87                     | PO, UN, B10, B12, B15, B18, B7, PA, EL, SN, B9, PR, RA, PN, CR, B8, SF, SL, AS          | 1000              | CTA, FDA, GBM, GLM, MARS, MAXENT, MAXNET, RF, XGBOOST      | 0.45                             | 0.28                | 0.2                 | 0.25                | 0.21                         |
| <i>Bemisia tabaci</i>            | 634                    | UN, B14, B1, B10, PO, B8, B3, B9, RA, B16, CR, PR, PA, SN, SL, PN, AS, SF               | 1000              | CTA, FDA, GBM, GLM, MARS, MAXENT, MAXNET, RF, XGBOOST      | 0.34                             | 0.51                | 0.43                | 0.56                | 0.5                          |
| <i>Cinara cupressi</i>           | 65                     | B11, UN, B19, B3, B5, EL, PO, B16, B8, PR, RA, CR, SN, B2, B9, B17, SL, PN, PA, AS, SF  | 1000              | ANN, CTA, FDA, GBM, GLM, MARS, MAXENT, MAXNET, RF, XGBOOST | 0.38                             | 0.44                | 0.38                | 0.42                | 0.42                         |
| <i>Coptotermes formosanus</i>    | 95                     | PO, B11, CR, B7, B1, PA, RA, UN, B15, B12, SN, B2, PN, EL, B19, PR, SL, AS, SF          | 1000              | CTA, FDA, GBM, GLM, MARS, MAXENT, MAXNET, RF, XGBOOST      | 0.48                             | 0.66                | 0.54                | 0.5                 | 0.57                         |
| <i>Linepithema humile</i>        | 1247                   | B10, B3, B8, B7, B17, PA, UN, B19, B2, B9, RA, PO, EL, CR, PR, B13, B15, SF, PN, SN, AS | 1247              | ANN, CTA, FDA, GBM, GLM, MARS, MAXENT, MAXNET, RF, XGBOOST | 0.32                             | 0.35                | 0.18                | 0.35                | 0.26                         |
| <i>Lymantria dispar</i>          | 6555                   | B3, UN, B1, B7, PR, B18, CR, EL, PN, PO, B14, SN, SL, RA, B19, B15, PA, SF, AS          | 6555              | ANN, CTA, FDA, GBM, GLM, MARS, MAXENT, MAXNET, RF, XGBOOST | 0.46                             | 0.58                | 0.44                | 0.63                | 0.44                         |
| <i>Pheidole megacephala</i>      | 683                    | UN, B18, B11, PR, B17, B10, EL, PO, B2, SF, PA, PN, CR, SL, B3, AS, RA                  | 1000              | CTA, FDA, GBM, GLM, MARS, MAXENT, MAXNET, RF, XGBOOST      | 0.53                             | 0.45                | 0.24                | 0.45                | 0.24                         |
| <i>Platydemus manokwari</i>      | 214                    | PO, B1, UN, B14, B3, B2, B10, B18, SN, EL, B9, PA, CR, SL, PR, PN, RA, SF, B8, AS       | 1000              | ANN, CTA, FDA, GBM, GLM, MARS, MAXENT, MAXNET, RF, XGBOOST | 0.53                             | 0.58                | 0.38                | 0.55                | 0.47                         |
| <i>Solenopsis invicta</i>        | 2095                   | B4, UN, RA, B14, CR, PO, B15, PN, SN, PR, PA, B13, B10, SL, SF, B19, AS                 | 2095              | ANN, CTA, FDA, GBM, GLM, MARS, MAXENT, MAXNET, RF, XGBOOST | 0.31                             | 0.6                 | 0.43                | 0.59                | 0.62                         |
| <i>Trogoderma granarium</i>      | 71                     | B3, B7, B10, CR, B16, B2, PO, PN, B18, RA, PR, B8, EL, UN, AS, SF, B14, SN, B19, PA     | 1000              | CTA, FDA, GBM, GLM, MARS, MAXENT, MAXNET, RF, XGBOOST      | 0.35                             | 0.35                | 0.29                | 0.38                | 0.39                         |
| <i>Vespula vulgaris</i>          | 5166                   | B4, B1, B10, UN, B15, B2, B8, EL, SF, CR, PO, PR, SN, RA, B16, PN, PA, AS               | 5166              | ANN, CTA, FDA, GBM, GLM, MARS, MAXENT, MAXNET, RF, XGBOOST | 0.49                             | 0.42                | 0.3                 | 0.51                | 0.34                         |
| <i>Wasmannia auropunctata</i>    | 685                    | B6, B3, B14, B12, UN, PO, B10, PA, B18, SL, PR, RA, CR, SF, PN, SN, AS                  | 1000              | CTA, FDA, GBM, GLM, MARS, MAXENT, MAXNET, RF, XGBOOST      | 0.55                             | 0.63                | 0.38                | 0.6                 | 0.37                         |

Note: B1, Annual Mean Temperature; B2, Mean Diurnal Range; B3, Isothermality; B4, Temperature Seasonality; B5, Max Temperature of Warmest Month; B6, Min Temperature of Coldest Month; B7, Temperature Annual Range; B8, Mean Temperature of Wettest Quarter; B9, Mean Temperature of Driest Quarter; B10, Mean Temperature of Warmest Quarter; B11, Mean Temperature of Coldest Quarter; B12, Annual Precipitation; B13, Precipitation of Wettest Month; B14, Precipitation of Driest Month; B15, Precipitation Seasonality; B16, Precipitation of Wettest Quarter; B17, Precipitation of Driest Quarter; B18, Precipitation of Warmest Quarter; B19, Precipitation of Coldest Quarter; CR, cropland; PA, managed pasture; PN, non-forested primary land; PO, Population density; PR, forested primary land; RA, rangeland; SF, forested secondary land; SN, non-forested secondary land; UR: urban land; AS, aspect; EL, elevation; SL, slope. XGBOOST, Xtreme Gradient Boosting; MARS, Multiple Adaptive Regression Splines; RF, Random Forest; MAXENT, Maximum Entropy Model; GLM, Generalized Linear Model; ANN, Artificial Neural Network; CT, Classification Tree; GBM, Generalized Boosting Model; FDA, Flexible Discriminant Analysis; MAXNET, Maxnet model.
