# Supplementary material for: Future Climate Change and Anthropogenic Disturbance Promote the Invasions of the World’s Worst Invasive Insect Pests
Source: Insects. 2024 Apr 16;15(4):280. doi: 10.3390/insects15040280 (PMC11050065; doi:10.3390/insects15040280)
Supplement: Supplementary file 1 [file insects-15-00280-s001.zip]

Archive with 9 entries (9 files):
- Supplemental Material S1.xlsx
- Supplemental Material S2.xlsx
- Supplemental material S3.pdf
- Supplemental Material S4.xlsx
- Supplemental Material S5.xlsx
- Supplemental Material S6.xlsx
- Supplemental Material S7.docx
- Supplemental Material S8.xlsx
- Supplemental Material S9.pdf
