# Supplementary material for: Future Climate Change and Anthropogenic Disturbance Promote the Invasions of the World’s Worst Invasive Insect Pests
Source: Insects. 2024 Apr 16;15(4):280. doi: 10.3390/insects15040280 (PMC11050065; doi:10.3390/insects15040280)
Supplement: Supplementary file 1 [file insects-15-00280-s001.zip › Supplemental Material S1.xlsx]

## Sheet: Linepithema humile
S1 Importance scores of all factors in the preliminary models.
Predictors	Importance values
bio11	0.223683
bio1	0.103442
urban	0.0947316
bio3	0.0327258
bio17	0.0224978
bio6	0.0162633
bio19	0.0133658
bio14	0.0105856
bio5	0.0100526
bio4	0.00978989
POP	0.00629478
bio10	0.00568911
ele	0.00550656
bio8	0.00233644
bio9	0.00231756
primf	0.00194344
bio16	0.00165344
bio18	0.00159356
bio2	0.00156156
bio7	0.00108756
bio15	0.00104
rang	0.000790444
secdn	0.000611556
cropland	0.000448444
primn	0.000412111
bio12	0.000399
aspect	0.000306556
paster	0.000287333
slope	0.000268556
bio13	0.000221333
secdf	3.38889e-05

## Sheet:  Anoplophora glabripennis
Predictors	Importance values
urban	0.208741
POP	0.175947
bio5	0.0911746
bio10	0.0877156
bio3	0.0583088
cropland	0.0342594
bio16	0.0256212
bio13	0.0238618
bio6	0.0233046
bio4	0.0210849
bio1	0.0196246
bio9	0.0163303
bio15	0.0117342
bio11	0.010643
bio2	0.00913967
bio18	0.00900644
bio7	0.00635478
ele	0.00631522
bio14	0.00541878
bio12	0.00449289
bio8	0.00336722
bio17	0.00328989
slope	0.00276122
secdn	0.002691
rang	0.00192211
paster	0.00184944
secdf	0.00154956
bio19	0.00136711
aspect	0.00124
primn	0.00100478
primf	0.000824111

## Sheet:  Aedes albopictus
Predictors	Importance values
bio11	0.115869
POP	0.0841216
bio10	0.0667073
urban	0.0529482
bio1	0.0402157
bio12	0.0227108
bio5	0.0175123
ele	0.0156254
bio3	0.014108
bio6	0.0111331
bio14	0.00751467
bio7	0.00652889
bio4	0.00642056
bio13	0.00568178
primf	0.00533067
paster	0.00460156
bio16	0.00437189
cropland	0.003979
slope	0.00371556
rang	0.00284944
bio2	0.00251722
bio18	0.00200867
secdn	0.00161289
bio8	0.00100289
bio15	0.000832444
bio17	0.000723444
secdf	0.000718222
bio9	0.000689556
bio19	0.000640444
primn	0.000640333
aspect	4.45556e-05

## Sheet: Pheidole megacephala
Predictors	Importance values
bio3	0.106582
urban	0.0507303
bio4	0.0476457
primf	0.0206459
bio7	0.0197242
bio2	0.0157814
cropland	0.0150361
bio1	0.0145829
bio11	0.0140207
bio18	0.0112878
bio12	0.009244
primn	0.00816878
paster	0.007346
bio10	0.00649478
POP	0.00526222
ele	0.00504189
secdn	0.00495311
bio8	0.00415978
bio6	0.00339933
bio13	0.00335522
bio5	0.003158
bio14	0.00309367
bio17	0.00287
bio16	0.00281722
rang	0.00257956
bio15	0.00222022
bio19	0.00196822
slope	0.00185922
bio9	0.00133567
secdf	0.00120656
aspect	0.000218778

## Sheet:  Anopheles quadrimaculatus
Predictors	Importance values
POP	0.0835729
urban	0.0409697
bio10	0.0169586
bio7	0.0111376
bio12	0.0110413
bio6	0.00999389
bio1	0.00994033
bio17	0.00953222
bio5	0.00804089
ele	0.00547378
bio4	0.004431
bio15	0.003928
secdn	0.00323667
bio16	0.00316189
primf	0.00310578
bio13	0.00272411
bio18	0.002691
paster	0.00234956
rang	0.002223
bio2	0.00193067
bio14	0.00188622
bio11	0.00160567
bio8	0.00147278
primn	0.00142156
bio3	0.001415
bio9	0.000883
secdf	0.000827444
bio19	0.000728222
cropland	0.000616333
slope	0.000405667
aspect	7.6e-05

## Sheet: Vespula vulgaris
Predictors	Importance values
bio1	0.0789803
bio4	0.0341658
bio6	0.0329154
urban	0.0305872
bio10	0.0222432
bio3	0.0221536
bio5	0.0160761
bio16	0.00932778
ele	0.00727011
bio11	0.00633589
bio18	0.00593022
POP	0.00558422
bio19	0.00544678
bio17	0.005098
bio14	0.00441211
bio8	0.00431044
bio7	0.003989
primf	0.003444
slope	0.00253122
cropland	0.001869
bio12	0.00176567
bio13	0.00171711
bio2	0.001176
bio15	0.00104
paster	0.000756556
rang	0.000419222
secdf	0.000345778
bio9	0.000338111
aspect	0.000172222
secdn	7.1e-05
primn	6.47778e-05

## Sheet:  Anoplolepis gracilipes
Predictors	Importance values
bio18	0.0784034
bio4	0.0702722
bio13	0.0565841
POP	0.0393693
bio6	0.0314849
bio7	0.0160086
urban	0.0153341
bio1	0.013744
bio11	0.0109918
bio2	0.00799622
rang	0.00727389
primf	0.00724478
paster	0.00712122
bio16	0.00708267
bio9	0.00521533
bio8	0.00419422
slope	0.00408878
bio12	0.00256633
bio3	0.002179
bio19	0.001288
bio15	0.00125367
bio14	0.00114689
bio10	0.001039
bio17	0.000976111
cropland	0.000897333
ele	0.000806
primn	0.000561111
secdn	0.000538222
bio5	0.000278889
secdf	0.000250778
aspect	0.000129222

## Sheet: Cinara cupressi
Predictors	Importance values
bio3	0.178768
bio10	0.109121
bio4	0.091072
cropland	0.048821
POP	0.0379423
bio11	0.0333497
urban	0.0227957
ele	0.0214197
bio9	0.01649
secdn	0.0164217
primn	0.0152307
primf	0.013939
rang	0.0139167
bio8	0.011575
bio16	0.00919867
bio14	0.00842133
bio19	0.00817233
aspect	0.00642733
bio7	0.00591633
bio13	0.005598
bio18	0.005581
bio12	0.00208
bio1	0.00168
bio15	0.00112033
paster	0.001029
slope	0.000814667
bio2	0.000639667
bio17	0.000615333
bio5	0.000587667
secdf	0.000397667
bio6	0.000317667

## Sheet: Platydemus manokwari
Predictors	Importance values
bio17	0.152642
urban	0.14177
bio11	0.131049
bio6	0.11171
bio18	0.0825369
bio4	0.0268794
primf	0.0263527
bio14	0.0214484
bio13	0.0208932
bio1	0.0181309
bio10	0.0173989
bio16	0.016834
bio3	0.0163349
bio2	0.0155676
bio12	0.0113766
bio9	0.0108169
ele	0.00783111
POP	0.00758711
bio7	0.00736967
bio5	0.00573233
bio19	0.00466467
bio8	0.00443333
bio15	0.00312533
cropland	0.00307789
secdn	0.002544
rang	0.00204989
slope	0.00164044
primn	0.00157267
secdf	0.00151444
paster	0.00130667
aspect	0.00105144

## Sheet:  Coptotermes formosanus shiraki
Predictors	Importance values
urban	0.291426
bio10	0.0286144
bio14	0.0232393
bio1	0.0205864
ele	0.0155072
bio11	0.0111416
POP	0.00982956
bio6	0.00907167
bio3	0.00813478
bio16	0.007649
bio5	0.00658622
bio12	0.00581844
rang	0.003259
bio13	0.00240789
bio17	0.00236133
cropland	0.00224722
bio19	0.00184322
slope	0.00154544
bio9	0.001412
bio8	0.00139989
primn	0.00136744
bio4	0.00127044
paster	0.00124256
secdf	0.00108056
bio15	0.000941778
bio7	0.000849667
bio2	0.000818556
primf	0.000646556
bio18	0.000635333
aspect	0.000185889
secdn	0.000129444

[truncated: 5 more sheets: Lymantria dispar,  Trogoderma granarium, Wasmannia auropunctata, Solenopsis invicta, Bemisia tabaci]
