# Supplementary material for: Future Climate Change and Anthropogenic Disturbance Promote the Invasions of the World’s Worst Invasive Insect Pests
Source: Insects. 2024 Apr 16;15(4):280. doi: 10.3390/insects15040280 (PMC11050065; doi:10.3390/insects15040280)
Supplement: Supplementary file 1 [file insects-15-00280-s001.zip › Supplemental Material S2.xlsx]

## Sheet: Linepithema humile
						S2 Correlation analyses among all predictors
	aspect	bio1	bio2	bio3	bio4	bio5	bio6	bio7	bio8	bio9	bio10	bio11	bio12	bio13	bio14	bio15	bio16	bio17	bio18	bio19	cropland	ele	paster	POP	primf	primn	rang	secdf	secdn	slope	urban
aspect	1	0.0143286	0.00623786	0.110668	-0.103701	-0.0412466	0.0891139	-0.084455	-0.0710864	0.102383	-0.0516849	0.0784906	-0.02243	0.00322371	-0.035867	0.0950118	0.0104071	-0.0382115	-0.0619425	0.0723191	0.0180544	-0.0376075	-0.0255135	-0.0470578	0.0189505	-0.0282992	0.00972432	-0.00466821	-0.019608	0.0158599	0.051591
bio1	0.0143286	1	0.160046	0.109642	0.024045	0.646857	0.58579	0.0838176	0.641294	0.371607	0.780974	0.757937	0.135822	0.138988	0.071327	0.0231608	0.132387	0.0832907	0.335239	-0.17364	-0.0521879	-0.223325	-0.0821691	-0.0423752	0.0736989	0.118779	0.0711313	-0.012239	-0.137208	-0.293988	0.0349354
bio2	0.00623786	0.160046	1	0.215313	0.319152	0.603788	-0.405535	0.673956	0.00726393	0.105239	0.314379	-0.0868873	-0.299726	-0.193881	-0.241894	0.37698	-0.203145	-0.272619	-0.164419	-0.237125	0.101395	0.265274	0.0135549	-0.0354021	-0.0797015	0.326214	0.311867	-0.0169673	-0.150627	-0.137616	0.000150104
bio3	0.110668	0.109642	0.215313	1	-0.80217	-0.333713	0.487562	-0.537278	0.0133582	0.026864	-0.423177	0.592727	-0.0449963	0.225024	-0.299568	0.479567	0.217966	-0.292323	-0.0806366	0.035181	-0.248353	0.536713	0.0653898	-0.0970278	0.114147	0.278515	0.162971	-0.177886	-0.189237	0.275402	0.0567746
bio4	-0.103701	0.024045	0.319152	-0.80217	1	0.67545	-0.705849	0.911698	0.0467646	-0.000664548	0.638581	-0.627991	0.0148647	-0.216344	0.274601	-0.361381	-0.222747	0.257619	0.106223	-0.075534	0.317004	-0.325385	0.00126402	0.0764784	-0.0503313	-0.192518	-0.0444019	0.302874	0.0599389	-0.345224	-0.103017
bio5	-0.0412466	0.646857	0.603788	-0.333713	0.67545	1	-0.142605	0.785272	0.335915	0.349707	0.92304	0.0759085	-0.10273	-0.160157	0.0044104	0.0113058	-0.169926	-0.0070013	0.07887	-0.236438	0.225622	-0.270049	-0.057845	0.00670761	-0.0769117	0.122791	0.140453	0.0626064	-0.0528329	-0.382335	-0.0301417
bio6	0.0891139	0.58579	-0.405535	0.487562	-0.705849	-0.142605	1	-0.724807	0.304145	0.331845	0.0231049	0.924927	0.0964869	0.245662	-0.148315	0.202722	0.248004	-0.118932	0.083154	0.0399016	-0.229431	-0.106107	-0.0883589	-0.0617195	0.0520502	0.143769	-0.00235569	-0.259703	-0.0432382	0.100035	0.0802841
bio7	-0.084455	0.0838176	0.673956	-0.537278	0.911698	0.785272	-0.724807	1	0.0435623	0.0358352	0.628043	-0.525746	-0.131864	-0.265152	0.0958478	-0.118942	-0.273418	0.0695238	0.00288218	-0.189536	0.300567	-0.121597	0.0150085	0.0432773	-0.0860954	-0.00446339	0.0992382	0.206034	-0.00972776	-0.328707	-0.0712019
bio8	-0.0710864	0.641294	0.00726393	0.0133582	0.0467646	0.335915	0.304145	0.0435623	1	-0.296231	0.503364	0.443066	0.251247	0.178736	0.241132	-0.238345	0.174237	0.253669	0.579321	-0.30444	-0.0195416	-0.0377774	0.0230652	-0.0334021	0.120735	-0.00554563	0.0105148	-0.0108787	-0.0569368	-0.267996	-0.0114049
bio9	0.102383	0.371607	0.105239	0.026864	-0.000664548	0.349707	0.331845	0.0358352	-0.296231	1	0.313089	0.329344	-0.191571	-0.101324	-0.263585	0.313587	-0.100468	-0.246512	-0.350577	0.139646	0.0593916	-0.265973	-0.19785	0.0246984	-0.11514	0.121115	0.0261875	-0.0437059	-0.0110026	0.0258514	0.00622676
bio10	-0.0516849	0.780974	0.314379	-0.423177	0.638581	0.92304	0.0231049	0.628043	0.503364	0.313089	1	0.197261	0.0850675	-0.0516064	0.197399	-0.187033	-0.0595911	0.196612	0.287525	-0.184882	0.146797	-0.384967	-0.0825819	0.0176909	0.00755052	-0.00605865	0.0290155	0.160759	-0.0640017	-0.419854	-0.0253437
bio11	0.0784906	0.757937	-0.0868873	0.592727	-0.627991	0.0759085	0.924927	-0.525746	0.443066	0.329344	0.197261	1	0.0576706	0.218193	-0.162833	0.280209	0.217961	-0.140819	0.145825	-0.0939574	-0.253302	0.0262716	-0.0885419	-0.0761725	0.0667158	0.240896	0.0889539	-0.22897	-0.128164	0.0223609	0.100173
bio12	-0.02243	0.135822	-0.299726	-0.0449963	0.0148647	-0.10273	0.0964869	-0.131864	0.251247	-0.191571	0.0850675	0.0576706	1	0.847456	0.814453	-0.566185	0.856624	0.839099	0.806491	0.650933	-0.037388	-0.0659482	0.25275	-0.0144062	0.605151	-0.491697	-0.312217	0.539105	-0.168871	-0.107821	-0.232117
bio13	0.00322371	0.138988	-0.193881	0.225024	-0.216344	-0.160157	0.245662	-0.265152	0.178736	-0.101324	-0.0516064	0.218193	0.847456	1	0.424484	-0.10937	0.991368	0.454239	0.58833	0.681764	-0.0839699	0.0428385	0.251709	-0.0114632	0.491097	-0.303046	-0.29948	0.396008	-0.151651	0.0309922	-0.207239
bio14	-0.035867	0.071327	-0.241894	-0.299568	0.274601	0.0044104	-0.148315	0.0958478	0.241132	-0.263585	0.197399	-0.162833	0.814453	0.424484	1	-0.824627	0.434372	0.991295	0.784582	0.394613	0.028546	-0.152477	0.200501	-0.0182356	0.522237	-0.501363	-0.214835	0.485104	-0.170877	-0.248938	-0.147827
bio15	0.0950118	0.0231608	0.37698	0.479567	-0.361381	0.0113058	0.202722	-0.118942	-0.238345	0.313587	-0.187033	0.280209	-0.566185	-0.10937	-0.824627	1	-0.119168	-0.831509	-0.630103	-0.110467	-0.126907	0.164331	-0.166953	0.00462705	-0.32463	0.507554	0.140149	-0.399994	0.0109806	0.232371	0.209239
bio16	0.0104071	0.132387	-0.203145	0.217966	-0.222747	-0.169926	0.248004	-0.273418	0.174237	-0.100468	-0.0595911	0.217961	0.856624	0.991368	0.434372	-0.119168	1	0.461638	0.598848	0.689017	-0.0928306	0.0316638	0.228489	-0.0177301	0.504613	-0.306641	-0.301303	0.39873	-0.155931	0.0231046	-0.18834
bio17	-0.0382115	0.0832907	-0.272619	-0.292323	0.257619	-0.0070013	-0.118932	0.0695238	0.253669	-0.246512	0.196612	-0.140819	0.839099	0.454239	0.991295	-0.831509	0.461638	1	0.798952	0.412482	0.0195329	-0.138451	0.192072	-0.010208	0.541515	-0.518422	-0.2306	0.509141	-0.159017	-0.229211	-0.170423
bio18	-0.0619425	0.335239	-0.164419	-0.0806366	0.106223	0.07887	0.083154	0.00288218	0.579321	-0.350577	0.287525	0.145825	0.806491	0.58833	0.784582	-0.630103	0.598848	0.798952	1	0.128575	-0.0142186	0.0191631	0.161216	-0.0299165	0.495814	-0.376733	-0.19504	0.448527	-0.130288	-0.253894	-0.179122
bio19	0.0723191	-0.17364	-0.237125	0.035181	-0.075534	-0.236438	0.0399016	-0.189536	-0.30444	0.139646	-0.184882	-0.0939574	0.650933	0.681764	0.394613	-0.110467	0.689017	0.412482	0.128575	1	-0.0812011	-0.198442	0.154185	0.00389802	0.39733	-0.323389	-0.263529	0.397684	-0.164472	0.121684	-0.158798
cropland	0.0180544	-0.0521879	0.101395	-0.248353	0.317004	0.225622	-0.229431	0.300567	-0.0195416	0.0593916	0.146797	-0.253302	-0.037388	-0.0839699	0.028546	-0.126907	-0.0928306	0.0195329	-0.0142186	-0.0812011	1	-0.165103	0.227975	-0.0257405	-0.131234	-0.345555	-0.0481076	-0.0587225	0.100536	-0.312183	-0.256409
ele	-0.0376075	-0.223325	0.265274	0.536713	-0.325385	-0.270049	-0.106107	-0.121597	-0.0377774	-0.265973	-0.384967	0.0262716	-0.0659482	0.0428385	-0.152477	0.164331	0.0316638	-0.138451	0.0191631	-0.198442	-0.165103	1	0.106468	-0.0107167	0.0758274	0.151989	0.102916	0.0166952	-0.0155974	0.43254	-0.0732923
paster	-0.0255135	-0.0821691	0.0135549	0.0653898	0.00126402	-0.057845	-0.0883589	0.0150085	0.0230652	-0.19785	-0.0825819	-0.0885419	0.25275	0.251709	0.200501	-0.166953	0.228489	0.192072	0.161216	0.154185	0.227975	0.106468	1	-0.0267627	0.0971181	-0.197025	-0.210329	-0.0759378	-0.0592139	-0.0579819	-0.177404
POP	-0.0470578	-0.0423752	-0.0354021	-0.0970278	0.0764784	0.00670761	-0.0617195	0.0432773	-0.0334021	0.0246984	0.0176909	-0.0761725	-0.0144062	-0.0114632	-0.0182356	0.00462705	-0.0177301	-0.010208	-0.0299165	0.00389802	-0.0257405	-0.0107167	-0.0267627	1	-0.0298948	-0.0372355	-0.0476165	0.104016	0.00476824	0.0702667	0.00113331
primf	0.0189505	0.0736989	-0.0797015	0.114147	-0.0503313	-0.0769117	0.0520502	-0.0860954	0.120735	-0.11514	0.00755052	0.0667158	0.605151	0.491097	0.522237	-0.32463	0.504613	0.541515	0.495814	0.39733	-0.131234	0.0758274	0.0971181	-0.0298948	1	-0.409791	-0.164996	0.384185	-0.203402	-0.0393555	-0.163685
primn	-0.0282992	0.118779	0.326214	0.278515	-0.192518	0.122791	0.143769	-0.00446339	-0.00554563	0.121115	-0.00605865	0.240896	-0.491697	-0.303046	-0.501363	0.507554	-0.306641	-0.518422	-0.376733	-0.323389	-0.345555	0.151989	-0.197025	-0.0372355	-0.409791	1	0.0997509	-0.49032	-0.130875	0.221902	0.199743
rang	0.00972432	0.0711313	0.311867	0.162971	-0.0444019	0.140453	-0.00235569	0.0992382	0.0105148	0.0261875	0.0290155	0.0889539	-0.312217	-0.29948	-0.214835	0.140149	-0.301303	-0.2306	-0.19504	-0.263529	-0.0481076	0.102916	-0.210329	-0.0476165	-0.164996	0.0997509	1	-0.305933	0.00868515	0.0512437	-0.216599
secdf	-0.00466821	-0.012239	-0.0169673	-0.177886	0.302874	0.0626064	-0.259703	0.206034	-0.0108787	-0.0437059	0.160759	-0.22897	0.539105	0.396008	0.485104	-0.399994	0.39873	0.509141	0.448527	0.397684	-0.0587225	0.0166952	-0.0759378	0.104016	0.384185	-0.49032	-0.305933	1	-0.224304	-0.0947455	-0.20615
secdn	-0.019608	-0.137208	-0.150627	-0.189237	0.0599389	-0.0528329	-0.0432382	-0.00972776	-0.0569368	-0.0110026	-0.0640017	-0.128164	-0.168871	-0.151651	-0.170877	0.0109806	-0.155931	-0.159017	-0.130288	-0.164472	0.100536	-0.0155974	-0.0592139	0.00476824	-0.203402	-0.130875	0.00868515	-0.224304	1	0.0779595	-0.128597
slope	0.0158599	-0.293988	-0.137616	0.275402	-0.345224	-0.382335	0.100035	-0.328707	-0.267996	0.0258514	-0.419854	0.0223609	-0.107821	0.0309922	-0.248938	0.232371	0.0231046	-0.229211	-0.253894	0.121684	-0.312183	0.43254	-0.0579819	0.0702667	-0.0393555	0.221902	0.0512437	-0.0947455	0.0779595	1	-0.141233
urban	0.051591	0.0349354	0.000150104	0.0567746	-0.103017	-0.0301417	0.0802841	-0.0712019	-0.0114049	0.00622676	-0.0253437	0.100173	-0.232117	-0.207239	-0.147827	0.209239	-0.18834	-0.170423	-0.179122	-0.158798	-0.256409	-0.0732923	-0.177404	0.00113331	-0.163685	0.199743	-0.216599	-0.20615	-0.128597	-0.141233	1
Notes: The highlighted predictors were inputted into the formal species distribution models

## Sheet:  Anoplophora glabripennis
	aspect	bio1	bio2	bio3	bio4	bio5	bio6	bio7	bio8	bio9	bio10	bio11	bio12	bio13	bio14	bio15	bio16	bio17	bio18	bio19	cropland	ele	paster	POP	primf	primn	rang	secdf	secdn	slope	urban
aspect	1	-0.0251837	-0.174033	-0.104134	-0.0341608	-0.0684637	0.0351973	-0.0657867	-0.100443	0.0241621	-0.0506616	0.00509653	0.27969	0.248206	0.232661	-0.170277	0.23599	0.236392	0.228416	0.232214	-0.0968727	-0.0260496	-0.00615042	0.0971462	0.0859781	-0.0405581	-0.165789	0.123511	-0.0474658	0.148378	0.0271162
bio1	-0.0251837	1	-0.368417	0.182893	-0.427057	0.611641	0.83555	-0.502248	0.522123	0.74472	0.732592	0.869734	0.544436	0.677904	0.145801	-0.0851484	0.677371	0.215729	0.600385	0.219627	0.0201708	-0.190738	-0.0314586	0.30716	0.120688	-0.224046	-0.311768	0.137534	-0.0215536	-0.194439	0.00804411
bio2	-0.174033	-0.368417	1	0.317947	0.480883	0.0804468	-0.648687	0.652932	0.178743	-0.562704	-0.0634295	-0.517547	-0.580074	-0.5119	-0.419941	0.534334	-0.477848	-0.490368	-0.317757	-0.497079	-0.0509585	0.382241	-0.0646198	-0.24311	-0.0425428	0.514642	0.446623	-0.30069	-0.0515109	0.0686432	-0.0630803
bio3	-0.104134	0.182893	0.317947	1	-0.648057	-0.376726	0.330409	-0.491593	-0.180327	0.321439	-0.332803	0.445282	0.0963764	0.0661421	-0.0980686	-0.0329984	0.17872	-0.0710636	0.193037	-0.0625725	-0.362935	0.768029	-0.322845	-0.0160983	0.389474	-0.171927	0.0545885	0.37329	-0.0617121	0.276381	-0.224184
bio4	-0.0341608	-0.427057	0.480883	-0.648057	1	0.420719	-0.817754	0.974339	0.385514	-0.772963	0.298509	-0.81564	-0.541008	-0.388936	-0.303661	0.542291	-0.465403	-0.382191	-0.326739	-0.395484	0.308653	-0.397049	0.236171	-0.174582	-0.311987	0.550008	0.203748	-0.568315	-0.00355141	-0.216997	0.205119
bio5	-0.0684637	0.611641	0.0804468	-0.376726	0.420719	1	0.136624	0.344137	0.763785	0.130501	0.969848	0.167899	0.0842107	0.247825	-0.00573331	0.254667	0.185285	-0.00839184	0.198346	-0.0159717	0.321622	-0.576678	0.169598	0.106854	-0.211936	0.219271	-0.0664114	-0.344353	0.0336287	-0.422035	0.173056
bio6	0.0351973	0.83555	-0.648687	0.330409	-0.817754	0.136624	1	-0.883098	0.0419615	0.91962	0.279625	0.984238	0.69214	0.648782	0.361314	-0.46043	0.67541	0.449907	0.522919	0.459788	-0.107405	-0.0273428	-0.100849	0.288879	0.200344	-0.504153	-0.353979	0.407447	0.0307707	-0.032967	-0.0879658
bio7	-0.0657867	-0.502248	0.652932	-0.491593	0.974339	0.344137	-0.883098	1	0.32198	-0.809813	0.194319	-0.853346	-0.61613	-0.497543	-0.345171	0.557017	-0.552402	-0.430399	-0.401684	-0.443355	0.25413	-0.247216	0.175912	-0.223192	-0.290266	0.581693	0.304049	-0.549277	-0.0132371	-0.168642	0.165339
bio8	-0.100443	0.522123	0.178743	-0.180327	0.385514	0.763785	0.0419615	0.32198	1	-0.157952	0.811874	0.105773	-0.12408	0.26365	-0.455467	0.622631	0.229632	-0.446787	0.402275	-0.485835	0.200729	-0.223992	0.172477	0.152321	-0.032025	0.369052	-0.0576228	-0.40312	-0.0583461	-0.224904	0.0926531
bio9	0.0241621	0.74472	-0.562704	0.321439	-0.772963	0.130501	0.91962	-0.809813	-0.157952	1	0.227874	0.910553	0.690585	0.531946	0.514676	-0.595018	0.558063	0.592122	0.335127	0.627337	-0.140969	-0.0844512	-0.159919	0.213249	0.158031	-0.563997	-0.282668	0.474963	0.00632352	-0.104261	-0.0579291
bio10	-0.0506616	0.732592	-0.0634295	-0.332803	0.298509	0.969848	0.279625	0.194319	0.811874	0.227874	1	0.308481	0.184572	0.412713	-0.0283411	0.268894	0.350936	-0.014188	0.361088	-0.0194269	0.273053	-0.543923	0.151743	0.179388	-0.130961	0.157891	-0.182679	-0.276452	-0.0132467	-0.38399	0.16796
bio11	0.00509653	0.869734	-0.517547	0.445282	-0.81564	0.167899	0.984238	-0.853346	0.105773	0.910553	0.308481	1	0.654066	0.640347	0.28932	-0.378477	0.679063	0.375849	0.546319	0.386463	-0.147403	0.0642159	-0.146306	0.285679	0.233537	-0.45325	-0.316834	0.40237	-0.00760359	-0.0171418	-0.101422
bio12	0.27969	0.544436	-0.580074	0.0963764	-0.541008	0.0842107	0.69214	-0.61613	-0.12408	0.690585	0.184572	0.654066	1	0.846442	0.76222	-0.637003	0.861088	0.811041	0.713823	0.788119	-0.158031	-0.105102	-0.123615	0.328178	0.332557	-0.562296	-0.362599	0.544391	-0.236596	0.000947528	0.0402075
bio13	0.248206	0.677904	-0.5119	0.0661421	-0.388936	0.247825	0.648782	-0.497543	0.26365	0.531946	0.412713	0.640347	0.846442	1	0.356325	-0.166921	0.988294	0.411389	0.923765	0.402871	-0.130844	-0.0773542	-0.0798824	0.492844	0.308615	-0.314251	-0.425888	0.35115	-0.274146	0.048614	0.0147974
bio14	0.232661	0.145801	-0.419941	-0.0980686	-0.303661	-0.00573331	0.361314	-0.345171	-0.455467	0.514676	-0.0283411	0.28932	0.76222	0.356325	1	-0.841247	0.353582	0.987785	0.187694	0.9656	-0.01607	-0.281546	-0.077972	0.00121585	0.111482	-0.540616	-0.181606	0.438245	-0.0840622	-0.178252	0.125224
bio15	-0.170277	-0.0851484	0.534334	-0.0329984	0.542291	0.254667	-0.46043	0.557017	0.622631	-0.595018	0.268894	-0.378477	-0.637003	-0.166921	-0.841247	1	-0.206071	-0.872709	-0.0117062	-0.838393	0.0547131	0.158703	0.0849832	0.0301352	-0.17531	0.677413	0.197839	-0.513492	-0.0380897	0.0669708	-0.085748
bio16	0.23599	0.677371	-0.477848	0.17872	-0.465403	0.185285	0.67541	-0.552402	0.229632	0.558063	0.350936	0.679063	0.861088	0.988294	0.353582	-0.206071	1	0.41381	0.938109	0.397956	-0.179824	0.0213642	-0.117506	0.477116	0.390997	-0.358299	-0.415582	0.4115	-0.29783	0.0824507	0.000689246
bio17	0.236392	0.215729	-0.490368	-0.0710636	-0.382191	-0.00839184	0.449907	-0.430399	-0.446787	0.592122	-0.014188	0.375849	0.811041	0.411389	0.987785	-0.872709	0.41381	1	0.229841	0.979394	-0.0278092	-0.271672	-0.0539957	0.0239342	0.124583	-0.594004	-0.206666	0.478804	-0.080918	-0.15263	0.106934
bio18	0.228416	0.600385	-0.317757	0.193037	-0.326739	0.198346	0.522919	-0.401684	0.402275	0.335127	0.361088	0.546319	0.713823	0.923765	0.187694	-0.0117062	0.938109	0.229841	1	0.180447	-0.132375	0.081635	-0.0830145	0.476612	0.379015	-0.209759	-0.390428	0.262318	-0.286081	0.0618173	0.0336768
bio19	0.232214	0.219627	-0.497079	-0.0625725	-0.395484	-0.0159717	0.459788	-0.443355	-0.485835	0.627337	-0.0194269	0.386463	0.788119	0.402871	0.9656	-0.838393	0.397956	0.979394	0.180447	1	-0.0403355	-0.27927	-0.0757668	0.0358051	0.0865267	-0.571453	-0.193527	0.466202	-0.0570847	-0.138768	0.0525857
cropland	-0.0968727	0.0201708	-0.0509585	-0.362935	0.308653	0.321622	-0.107405	0.25413	0.200729	-0.140969	0.273053	-0.147403	-0.158031	-0.130844	-0.01607	0.0547131	-0.179824	-0.0278092	-0.132375	-0.0403355	1	-0.429306	0.435136	-0.146653	-0.427684	-0.0525919	-0.125984	-0.487098	0.432382	-0.430069	0.166208
ele	-0.0260496	-0.190738	0.382241	0.768029	-0.397049	-0.576678	-0.0273428	-0.247216	-0.223992	-0.0844512	-0.543923	0.0642159	-0.105102	-0.0773542	-0.281546	0.158703	0.0213642	-0.271672	0.081635	-0.27927	-0.429306	1	-0.274308	-0.0919856	0.359538	-0.00987127	0.331904	0.28858	-0.200402	0.562828	-0.294364
paster	-0.00615042	-0.0314586	-0.0646198	-0.322845	0.236171	0.169598	-0.100849	0.175912	0.172477	-0.159919	0.151743	-0.146306	-0.123615	-0.0798824	-0.077972	0.0849832	-0.117506	-0.0539957	-0.0830145	-0.0757668	0.435136	-0.274308	1	-0.112848	-0.423386	0.202301	-0.204744	-0.399875	0.123333	-0.0682047	-0.15694
POP	0.0971462	0.30716	-0.24311	-0.0160983	-0.174582	0.106854	0.288879	-0.223192	0.152321	0.213249	0.179388	0.285679	0.328178	0.492844	0.00121585	0.0301352	0.477116	0.0239342	0.476612	0.0358051	-0.146653	-0.0919856	-0.112848	1	-0.0721244	-0.0248615	-0.0340652	-0.093565	-0.0474207	0.121886	-0.010124
primf	0.0859781	0.120688	-0.0425428	0.389474	-0.311987	-0.211936	0.200344	-0.290266	-0.032025	0.158031	-0.130961	0.233537	0.332557	0.308615	0.111482	-0.17531	0.390997	0.124583	0.379015	0.0865267	-0.427684	0.359538	-0.423386	-0.0721244	1	-0.44144	-0.158219	0.609525	-0.336399	0.18091	-0.0754455
primn	-0.0405581	-0.224046	0.514642	-0.171927	0.550008	0.219271	-0.504153	0.581693	0.369052	-0.563997	0.157891	-0.45325	-0.562296	-0.314251	-0.540616	0.677413	-0.358299	-0.594004	-0.209759	-0.571453	-0.0525919	-0.00987127	0.202301	-0.0248615	-0.44144	1	0.0666292	-0.614499	-0.00925623	0.219216	-0.148552
rang	-0.165789	-0.311768	0.446623	0.0545885	0.203748	-0.0664114	-0.353979	0.304049	-0.0576228	-0.282668	-0.182679	-0.316834	-0.362599	-0.425888	-0.181606	0.197839	-0.415582	-0.206666	-0.390428	-0.193527	-0.125984	0.331904	-0.204744	-0.0340652	-0.158219	0.0666292	1	-0.185006	-0.00284431	-0.0118948	-0.153745
secdf	0.123511	0.137534	-0.30069	0.37329	-0.568315	-0.344353	0.407447	-0.549277	-0.40312	0.474963	-0.276452	0.40237	0.544391	0.35115	0.438245	-0.513492	0.4115	0.478804	0.262318	0.466202	-0.487098	0.28858	-0.399875	-0.093565	0.609525	-0.614499	-0.185006	1	-0.449471	0.214909	-0.143545
secdn	-0.0474658	-0.0215536	-0.0515109	-0.0617121	-0.00355141	0.0336287	0.0307707	-0.0132371	-0.0583461	0.00632352	-0.0132467	-0.00760359	-0.236596	-0.274146	-0.0840622	-0.0380897	-0.29783	-0.080918	-0.286081	-0.0570847	0.432382	-0.200402	0.123333	-0.0474207	-0.336399	-0.00925623	-0.00284431	-0.449471	1	-0.171625	0.0839567
slope	0.148378	-0.194439	0.0686432	0.276381	-0.216997	-0.422035	-0.032967	-0.168642	-0.224904	-0.104261	-0.38399	-0.0171418	0.000947528	0.048614	-0.178252	0.0669708	0.0824507	-0.15263	0.0618173	-0.138768	-0.430069	0.562828	-0.0682047	0.121886	0.18091	0.219216	-0.0118948	0.214909	-0.171625	1	-0.39568
urban	0.0271162	0.00804411	-0.0630803	-0.224184	0.205119	0.173056	-0.0879658	0.165339	0.0926531	-0.0579291	0.16796	-0.101422	0.0402075	0.0147974	0.125224	-0.085748	0.000689246	0.106934	0.0336768	0.0525857	0.166208	-0.294364	-0.15694	-0.010124	-0.0754455	-0.148552	-0.153745	-0.143545	0.0839567	-0.39568	1
Note: The highlighted predictors were inputted into the formal species distribution models

## Sheet:  Aedes albopictus
	aspect	bio1	bio2	bio3	bio4	bio5	bio6	bio7	bio8	bio9	bio10	bio11	bio12	bio13	bio14	bio15	bio16	bio17	bio18	bio19	cropland	ele	paster	POP	primf	primn	rang	secdf	secdn	slope	urban
aspect	1	0.010803	-0.0180531	0.0341895	-0.0451931	-0.0541574	0.0251102	-0.0458939	0.00887285	0.0103323	-0.0425286	0.0252427	0.0823973	0.0798102	0.0176841	0.0127551	0.0835963	0.0197227	0.0925949	0.0274769	-0.0370818	0.0569533	0.0136514	0.0195051	0.0477079	-0.0304038	-0.00652251	0.0197486	-0.0322628	0.0408694	0.00350301
bio1	0.010803	1	-0.0192284	0.846116	-0.851688	0.60877	0.943629	-0.792742	0.861342	0.848063	0.749838	0.972466	0.416997	0.560985	-0.263012	0.588324	0.581456	-0.280183	0.209263	0.176626	-0.358815	-0.0273675	-0.148079	-0.0498364	0.290385	0.316358	0.242883	-0.309899	-0.109012	-0.125178	-0.196118
bio2	-0.0180531	-0.0192284	1	0.020171	0.176493	0.430931	-0.244491	0.412883	0.0597554	-0.0808282	0.15204	-0.0969515	-0.21776	-0.188476	-0.12659	0.0609489	-0.189412	-0.11622	-0.0572419	-0.273065	0.0263562	0.248726	0.18674	-0.175512	-0.0519487	0.0707889	0.329835	0.0594294	-0.227894	-0.227537	-0.117526
bio3	0.0341895	0.846116	0.020171	1	-0.930168	0.26896	0.900397	-0.866366	0.690898	0.724836	0.372001	0.9145	0.434821	0.517313	-0.16335	0.49744	0.542434	-0.192999	0.199764	0.24552	-0.442746	0.226499	-0.0319925	-0.170291	0.378694	0.265692	0.243807	-0.31613	-0.0979661	0.00663546	-0.21366
bio4	-0.0451931	-0.851688	0.176493	-0.930168	1	-0.150956	-0.953751	0.964914	-0.674394	-0.740351	-0.296184	-0.949307	-0.431745	-0.562681	0.262878	-0.560168	-0.583163	0.276443	-0.260985	-0.144469	0.47222	-0.258185	0.0837015	0.125541	-0.390316	-0.265675	-0.232181	0.364624	0.0410752	-0.112741	0.214856
bio5	-0.0541574	0.60877	0.430931	0.26896	-0.150956	1	0.350522	-0.0217084	0.550147	0.5285	0.92688	0.433029	0.0160843	0.141563	-0.251267	0.366112	0.148717	-0.269882	-0.180676	0.0477245	0.0339416	-0.316738	-0.146148	-0.00347565	-0.0659913	0.282981	0.229719	-0.117579	-0.116902	-0.395009	-0.0959936
bio6	0.0251102	0.943629	-0.244491	0.900397	-0.953751	0.350522	1	-0.943943	0.754984	0.83936	0.530977	0.986509	0.441247	0.573922	-0.242233	0.566424	0.593744	-0.262362	0.195097	0.235249	-0.413141	0.0480342	-0.145924	-0.0660288	0.335525	0.295452	0.182586	-0.352983	-0.0272606	0.00955314	-0.190417
bio7	-0.0458939	-0.792742	0.412883	-0.866366	0.964914	-0.0217084	-0.943943	1	-0.612028	-0.709729	-0.240115	-0.90046	-0.465359	-0.56276	0.170018	-0.47561	-0.581398	0.184944	-0.271948	-0.234305	0.452988	-0.162917	0.10426	0.0692601	-0.38143	-0.21565	-0.11394	0.335363	-0.0121043	-0.149427	0.169433
bio8	0.00887285	0.861342	0.0597554	0.690898	-0.674394	0.550147	0.754984	-0.612028	1	0.490614	0.694234	0.803405	0.401975	0.534287	-0.221563	0.520397	0.554367	-0.232215	0.414864	0.0221876	-0.309725	-0.00463717	-0.119425	-0.00233412	0.278586	0.260104	0.238332	-0.231729	-0.182316	-0.158852	-0.136453
bio9	0.0103323	0.848063	-0.0808282	0.724836	-0.740351	0.5285	0.83936	-0.709729	0.490614	1	0.639906	0.842287	0.305209	0.397839	-0.18269	0.442912	0.414326	-0.199404	-0.0540101	0.311034	-0.316311	-0.107416	-0.139268	-0.0717195	0.217566	0.268633	0.145908	-0.265043	-0.00788413	-0.0941467	-0.195341
bio10	-0.0425286	0.749838	0.15204	0.372001	-0.296184	0.92688	0.530977	-0.240115	0.694234	0.639906	1	0.581145	0.204695	0.304797	-0.152334	0.366936	0.315768	-0.170603	-0.0060395	0.173742	-0.0591173	-0.405292	-0.185924	0.064719	0.0276092	0.255999	0.131799	-0.108427	-0.129722	-0.365145	-0.082734
bio11	0.0252427	0.972466	-0.0969515	0.9145	-0.949307	0.433029	0.986509	-0.90046	0.803405	0.842287	0.581145	1	0.436455	0.57962	-0.272143	0.595829	0.600863	-0.289234	0.224299	0.179536	-0.424236	0.0872927	-0.132067	-0.08572	0.343532	0.308295	0.243099	-0.343993	-0.080048	-0.0253052	-0.210868
bio12	0.0823973	0.416997	-0.21776	0.434821	-0.431745	0.0160843	0.441247	-0.465359	0.401975	0.305209	0.204695	0.436455	1	0.841861	0.457303	-0.0711197	0.874027	0.462676	0.662236	0.539364	-0.265212	-0.0124558	-0.0994152	0.0860474	0.555403	-0.251702	-0.103645	0.149763	-0.317276	0.0760899	-0.0575388
bio13	0.0798102	0.560985	-0.188476	0.517313	-0.562681	0.141563	0.573922	-0.56276	0.534287	0.397839	0.304797	0.57962	0.841861	1	0.0164636	0.395778	0.989371	0.00580558	0.560938	0.372836	-0.275414	0.0745466	-0.11092	0.0919748	0.40089	-0.0665626	0.00909108	0.00531105	-0.228565	0.0978406	-0.0926145
bio14	0.0176841	-0.263012	-0.12659	-0.16335	0.262878	-0.251267	-0.242233	0.170018	-0.221563	-0.18269	-0.152334	-0.272143	0.457303	0.0164636	1	-0.759023	0.0327873	0.979318	0.265967	0.489425	-0.0013365	-0.226545	0.029563	0.0909643	0.235959	-0.325485	-0.334093	0.33016	-0.173562	-0.00392151	0.102768
bio15	0.0127551	0.588324	0.0609489	0.49744	-0.560168	0.366112	0.566424	-0.47561	0.520397	0.442912	0.366936	0.595829	-0.0711197	0.395778	-0.759023	1	0.367418	-0.798371	-0.0170392	-0.250757	-0.21215	0.241561	-0.0811397	-0.0260172	-0.0653774	0.434289	0.28761	-0.364998	0.0596994	0.0627198	-0.115854
bio16	0.0835963	0.581456	-0.189412	0.542434	-0.583163	0.148717	0.593744	-0.581398	0.554367	0.414326	0.315768	0.600863	0.874027	0.989371	0.0327873	0.367418	1	0.0197858	0.589498	0.372813	-0.286479	0.0722226	-0.125969	0.0827437	0.448235	-0.0838987	0.0106855	0.0137614	-0.243934	0.0934169	-0.0995731
bio17	0.0197227	-0.280183	-0.11622	-0.192999	0.276443	-0.269882	-0.262362	0.184944	-0.232215	-0.199404	-0.170603	-0.289234	0.462676	0.00580558	0.979318	-0.798371	0.0197858	1	0.287153	0.479947	0.00655504	-0.213869	0.0522179	0.0796278	0.261289	-0.358961	-0.329058	0.330351	-0.187895	-0.0152373	0.0957085
bio18	0.0925949	0.209263	-0.0572419	0.199764	-0.260985	-0.180676	0.195097	-0.271948	0.414864	-0.0540101	-0.0060395	0.224299	0.662236	0.560938	0.265967	-0.0170392	0.589498	0.287153	1	-0.0721374	-0.196696	0.20179	0.057101	0.13725	0.374062	-0.235076	-0.00480001	0.109724	-0.325517	0.110403	-0.0200488
bio19	0.0274769	0.176626	-0.273065	0.24552	-0.144469	0.0477245	0.235249	-0.234305	0.0221876	0.311034	0.173742	0.179536	0.539364	0.372836	0.489425	-0.250757	0.372813	0.479947	-0.0721374	1	-0.153406	-0.277403	-0.111058	0.028304	0.341267	-0.152154	-0.258526	0.175696	-0.0777092	-0.0565771	-0.0032802
cropland	-0.0370818	-0.358815	0.0263562	-0.442746	0.47222	0.0339416	-0.413141	0.452988	-0.309725	-0.316311	-0.0591173	-0.424236	-0.265212	-0.275414	-0.0013365	-0.21215	-0.286479	0.00655504	-0.196696	-0.153406	1	-0.231141	0.0829472	0.0535482	-0.343026	-0.253742	-0.114295	-0.125532	0.0727742	-0.227793	-0.000693265
ele	0.0569533	-0.0273675	0.248726	0.226499	-0.258185	-0.316738	0.0480342	-0.162917	-0.00463717	-0.107416	-0.405292	0.0872927	-0.0124558	0.0745466	-0.226545	0.241561	0.0722226	-0.213869	0.20179	-0.277403	-0.231141	1	0.190687	-0.119863	0.192338	0.0727843	0.274959	-0.148228	-0.0791384	0.491855	-0.158942
paster	0.0136514	-0.148079	0.18674	-0.0319925	0.0837015	-0.146148	-0.145924	0.10426	-0.119425	-0.139268	-0.185924	-0.132067	-0.0994152	-0.11092	0.029563	-0.0811397	-0.125969	0.0522179	0.057101	-0.111058	0.0829472	0.190687	1	-0.0715187	-0.0747415	-0.117734	-0.110598	-0.165339	-0.0396863	-0.02522	-0.0952804
POP	0.0195051	-0.0498364	-0.175512	-0.170291	0.125541	-0.00347565	-0.0660288	0.0692601	-0.00233412	-0.0717195	0.064719	-0.08572	0.0860474	0.0919748	0.0909643	-0.0260172	0.0827437	0.0796278	0.13725	0.028304	0.0535482	-0.119863	-0.0715187	1	-0.0862944	-0.0509222	-0.121	0.0860064	0.00280367	0.047006	0.143269
primf	0.0477079	0.290385	-0.0519487	0.378694	-0.390316	-0.0659913	0.335525	-0.38143	0.278586	0.217566	0.0276092	0.343532	0.555403	0.40089	0.235959	-0.0653774	0.448235	0.261289	0.374062	0.341267	-0.343026	0.192338	-0.0747415	-0.0862944	1	-0.341387	-0.0179161	-0.0581601	-0.279246	0.107327	-0.108196
primn	-0.0304038	0.316358	0.0707889	0.265692	-0.265675	0.282981	0.295452	-0.21565	0.260104	0.268633	0.255999	0.308295	-0.251702	-0.0665626	-0.325485	0.434289	-0.0838987	-0.358961	-0.235076	-0.152154	-0.253742	0.0727843	-0.117734	-0.0509222	-0.341387	1	0.00115111	-0.337993	0.0444764	0.0547447	-0.0717782
rang	-0.00652251	0.242883	0.329835	0.243807	-0.232181	0.229719	0.182586	-0.11394	0.238332	0.145908	0.131799	0.243099	-0.103645	0.00909108	-0.334093	0.28761	0.0106855	-0.329058	-0.00480001	-0.258526	-0.114295	0.274959	-0.110598	-0.121	-0.0179161	0.00115111	1	-0.284691	-0.12985	-0.0846409	-0.175923
secdf	0.0197486	-0.309899	0.0594294	-0.31613	0.364624	-0.117579	-0.352983	0.335363	-0.231729	-0.265043	-0.108427	-0.343993	0.149763	0.00531105	0.33016	-0.364998	0.0137614	0.330351	0.109724	0.175696	-0.125532	-0.148228	-0.165339	0.0860064	-0.0581601	-0.337993	-0.284691	1	-0.241095	0.0416839	0.0233866
secdn	-0.0322628	-0.109012	-0.227894	-0.0979661	0.0410752	-0.116902	-0.0272606	-0.0121043	-0.182316	-0.00788413	-0.129722	-0.080048	-0.317276	-0.228565	-0.173562	0.0596994	-0.243934	-0.187895	-0.325517	-0.0777092	0.0727742	-0.0791384	-0.0396863	0.00280367	-0.279246	0.0444764	-0.12985	-0.241095	1	0.0632917	0.000980721
slope	0.0408694	-0.125178	-0.227537	0.00663546	-0.112741	-0.395009	0.00955314	-0.149427	-0.158852	-0.0941467	-0.365145	-0.0253052	0.0760899	0.0978406	-0.00392151	0.0627198	0.0934169	-0.0152373	0.110403	-0.0565771	-0.227793	0.491855	-0.02522	0.047006	0.107327	0.0547447	-0.0846409	0.0416839	0.0632917	1	-0.101687
urban	0.00350301	-0.196118	-0.117526	-0.21366	0.214856	-0.0959936	-0.190417	0.169433	-0.136453	-0.195341	-0.082734	-0.210868	-0.0575388	-0.0926145	0.102768	-0.115854	-0.0995731	0.0957085	-0.0200488	-0.0032802	-0.000693265	-0.158942	-0.0952804	0.143269	-0.108196	-0.0717782	-0.175923	0.0233866	0.000980721	-0.101687	1
Note: The highlighted predictors were inputted into the formal species distribution models

## Sheet: Pheidole megacephala
	aspect	bio1	bio2	bio3	bio4	bio5	bio6	bio7	bio8	bio9	bio10	bio11	bio12	bio13	bio14	bio15	bio16	bio17	bio18	bio19	cropland	ele	paster	POP	primf	primn	rang	secdf	secdn	slope	urban
aspect	1	0.0605078	0.0421323	0.0575413	-0.0174905	0.075533	0.0390028	0.00494254	0.0440545	0.0428409	0.058496	0.0515075	-0.0765054	-0.0185908	-0.102433	0.104491	-0.0296662	-0.113952	-0.0486524	-0.0745347	0.0132932	0.0185078	-0.032224	0.0454445	0.0575855	0.00598542	0.0325476	-0.0426163	0.00325882	-0.0566092	-0.0269602
bio1	0.0605078	1	-0.246731	0.420368	-0.522085	0.772961	0.873448	-0.467252	0.818653	0.844695	0.899196	0.948171	0.288317	0.419701	0.0344197	0.238215	0.386417	0.0540652	0.202776	0.15191	-0.128196	-0.535083	-0.0162481	0.177463	0.00813908	-0.0580254	-0.136129	0.0166334	0.180275	-0.258102	-0.205495
bio2	0.0421323	-0.246731	1	-0.0425283	0.427947	0.222542	-0.597275	0.79209	-0.0543435	-0.417076	-0.115762	-0.363375	-0.528853	-0.379379	-0.515846	0.285669	-0.3674	-0.530415	-0.278716	-0.487337	0.0184086	0.385852	0.20148	-0.3682	-0.129492	0.344944	0.563893	-0.116687	0.00618046	-0.190838	-0.120712
bio3	0.0575413	0.420368	-0.0425283	1	-0.851462	0.0232049	0.568926	-0.606521	0.155853	0.484561	0.0438504	0.623511	0.278772	0.333489	0.0446132	0.165279	0.310309	0.0577204	0.126175	0.197763	-0.0209151	0.264337	0.243716	0.0695436	0.210332	-0.151827	-0.0763444	-0.0663905	0.12112	0.163285	-0.376477
bio4	-0.0174905	-0.522085	0.427947	-0.851462	1	0.0448868	-0.779359	0.879102	-0.168141	-0.657541	-0.104651	-0.762825	-0.421977	-0.467616	-0.163858	-0.143396	-0.437676	-0.179189	-0.207849	-0.317283	0.114561	-0.0764356	-0.145365	-0.169076	-0.193779	0.188226	0.273488	0.0835487	-0.151035	-0.23884	0.309891
bio5	0.075533	0.772961	0.222542	0.0232049	0.0448868	1	0.427841	0.162084	0.72553	0.553017	0.921926	0.570033	-0.0696123	0.0933551	-0.211157	0.255401	0.0706522	-0.200028	-0.0734346	-0.0515526	-0.0378584	-0.543723	-0.0631275	-0.00239632	-0.145338	0.146653	0.127967	0.00648482	0.20356	-0.482487	-0.0763583
bio6	0.0390028	0.873448	-0.597275	0.568926	-0.779359	0.427841	1	-0.822556	0.555382	0.905381	0.642475	0.95647	0.472406	0.518032	0.234312	0.0901518	0.484123	0.256269	0.251619	0.386457	-0.105103	-0.446011	-0.0140942	0.272049	0.114855	-0.214842	-0.35178	0.0224665	0.178225	-0.0363072	-0.183172
bio7	0.00494254	-0.467252	0.79209	-0.606521	0.879102	0.162084	-0.822556	1	-0.149848	-0.640499	-0.121364	-0.685569	-0.559545	-0.506821	-0.388664	0.0622701	-0.484086	-0.405633	-0.320907	-0.454348	0.0909259	0.144832	-0.0243311	-0.298516	-0.216836	0.326823	0.464567	-0.0204476	-0.066501	-0.263932	0.151934
bio8	0.0440545	0.818653	-0.0543435	0.155853	-0.168141	0.72553	0.555382	-0.149848	1	0.420661	0.844781	0.66704	0.202072	0.310244	0.0222082	0.188565	0.29428	0.0339285	0.348631	-0.121416	-0.127324	-0.470152	0.00480805	0.139361	0.0137431	-0.00420574	-0.0295093	0.111412	0.0283315	-0.312952	-0.177899
bio9	0.0428409	0.844695	-0.417076	0.484561	-0.657541	0.553017	0.905381	-0.640499	0.420661	1	0.676044	0.895263	0.301538	0.378953	0.0954134	0.148914	0.343043	0.122933	0.036043	0.396167	-0.0944717	-0.485151	-0.0467165	0.196794	0.00719806	-0.118598	-0.256907	-0.01794	0.236645	-0.112542	-0.123442
bio10	0.058496	0.899196	-0.115762	0.0438504	-0.104651	0.921926	0.642475	-0.121364	0.844781	0.676044	1	0.722395	0.129629	0.241694	-0.0186886	0.170316	0.217645	-0.00254261	0.102113	0.061085	-0.0767501	-0.695989	-0.115103	0.135027	-0.0913737	0.00762994	-0.0550884	0.0640811	0.156342	-0.419168	-0.0595826
bio11	0.0515075	0.948171	-0.363375	0.623511	-0.762825	0.570033	0.95647	-0.685569	0.66704	0.895263	0.722395	1	0.375783	0.484896	0.0964225	0.220492	0.44888	0.117313	0.215365	0.252757	-0.132856	-0.392725	0.0307642	0.205241	0.0744483	-0.120268	-0.219453	-0.0151678	0.20077	-0.107396	-0.258422
bio12	-0.0765054	0.288317	-0.528853	0.278772	-0.421977	-0.0696123	0.472406	-0.559545	0.202072	0.301538	0.129629	0.375783	1	0.831074	0.779945	-0.323949	0.865113	0.798459	0.757246	0.643416	-0.0593556	-0.15065	0.0642916	0.134545	0.447801	-0.289146	-0.390039	0.300872	-0.309791	0.12241	-0.0450517
bio13	-0.0185908	0.419701	-0.379379	0.333489	-0.467616	0.0933551	0.518032	-0.506821	0.310244	0.378953	0.241694	0.484896	0.831074	1	0.365974	0.151381	0.985716	0.387274	0.776644	0.332775	-0.149947	-0.11212	0.246426	0.0369424	0.418714	-0.216881	-0.255089	0.20891	-0.271965	0.072152	-0.180357
bio14	-0.102433	0.0344197	-0.515846	0.0446132	-0.163858	-0.211157	0.234312	-0.388664	0.0222082	0.0954134	-0.0186886	0.0964225	0.779945	0.365974	1	-0.668098	0.419906	0.990361	0.480192	0.674253	-0.0375457	-0.20043	-0.165468	0.176655	0.310121	-0.239773	-0.356249	0.280661	-0.309586	0.137339	0.169583
bio15	0.104491	0.238215	0.285669	0.165279	-0.143396	0.255401	0.0901518	0.0622701	0.188565	0.148914	0.170316	0.220492	-0.323949	0.151381	-0.668098	1	0.102137	-0.67333	-0.0215993	-0.484559	-0.211185	0.17405	0.247647	-0.147969	-0.0823145	0.155985	0.249784	-0.201053	0.160905	0.00623763	-0.28285
bio16	-0.0296662	0.386417	-0.3674	0.310309	-0.437676	0.0706522	0.484123	-0.484086	0.29428	0.343043	0.217645	0.44888	0.865113	0.985716	0.419906	0.102137	1	0.435656	0.820665	0.355389	-0.151627	-0.102902	0.254413	0.032118	0.435621	-0.216406	-0.260916	0.225453	-0.294864	0.0875608	-0.176226
bio17	-0.113952	0.0540652	-0.530415	0.0577204	-0.179189	-0.200028	0.256269	-0.405633	0.0339285	0.122933	-0.00254261	0.117313	0.798459	0.387274	0.990361	-0.67333	0.435656	1	0.477977	0.713193	-0.0119759	-0.212238	-0.158581	0.184831	0.294176	-0.247397	-0.37388	0.297488	-0.304387	0.133113	0.160797
bio18	-0.0486524	0.202776	-0.278716	0.126175	-0.207849	-0.0734346	0.251619	-0.320907	0.348631	0.036043	0.102113	0.215365	0.757246	0.776644	0.480192	-0.0215993	0.820665	0.477977	1	0.107225	-0.164148	-0.0397684	0.284856	0.0265866	0.445983	-0.223413	-0.183207	0.260746	-0.412347	0.112211	-0.159382
bio19	-0.0745347	0.15191	-0.487337	0.197763	-0.317283	-0.0515526	0.386457	-0.454348	-0.121416	0.396167	0.061085	0.252757	0.643416	0.332775	0.674253	-0.484559	0.355389	0.713193	0.107225	1	0.113258	-0.21339	-0.142123	0.179362	0.143619	-0.241555	-0.380279	0.214147	0.00681505	0.068995	0.117792
cropland	0.0132932	-0.128196	0.0184086	-0.0209151	0.114561	-0.0378584	-0.105103	0.0909259	-0.127324	-0.0944717	-0.0767501	-0.132856	-0.0593556	-0.149947	-0.0375457	-0.211185	-0.151627	-0.0119759	-0.164148	0.113258	1	0.0626205	-0.0035739	0.187038	-0.211203	-0.182015	-0.130223	0.0776393	0.164887	-0.135821	-0.035481
ele	0.0185078	-0.535083	0.385852	0.264337	-0.0764356	-0.543723	-0.446011	0.144832	-0.470152	-0.485151	-0.695989	-0.392725	-0.15065	-0.11212	-0.20043	0.17405	-0.102902	-0.212238	-0.0397684	-0.21339	0.0626205	1	0.198483	-0.09817	0.131806	-0.0110764	0.25532	-0.0418722	0.0198183	0.420332	-0.228399
paster	-0.032224	-0.0162481	0.20148	0.243716	-0.145365	-0.0631275	-0.0140942	-0.0243311	0.00480805	-0.0467165	-0.115103	0.0307642	0.0642916	0.246426	-0.165468	0.247647	0.254413	-0.158581	0.284856	-0.142123	-0.0035739	0.198483	1	-0.243651	0.122778	-0.133053	-0.0513992	-0.0332198	-0.140349	0.0608452	-0.230308
POP	0.0454445	0.177463	-0.3682	0.0695436	-0.169076	-0.00239632	0.272049	-0.298516	0.139361	0.196794	0.135027	0.205241	0.134545	0.0369424	0.176655	-0.147969	0.032118	0.184831	0.0265866	0.179362	0.187038	-0.09817	-0.243651	1	-0.137311	-0.217774	-0.269826	0.178381	0.00612425	0.0233935	0.059477
primf	0.0575855	0.00813908	-0.129492	0.210332	-0.193779	-0.145338	0.114855	-0.216836	0.0137431	0.00719806	-0.0913737	0.0744483	0.447801	0.418714	0.310121	-0.0823145	0.435621	0.294176	0.445983	0.143619	-0.211203	0.131806	0.122778	-0.137311	1	-0.38524	-0.193294	0.243422	-0.303116	0.202139	-0.0660136
primn	0.00598542	-0.0580254	0.344944	-0.151827	0.188226	0.146653	-0.214842	0.326823	-0.00420574	-0.118598	0.00762994	-0.120268	-0.289146	-0.216881	-0.239773	0.155985	-0.216406	-0.247397	-0.223413	-0.241555	-0.182015	-0.0110764	-0.133053	-0.217774	-0.38524	1	0.124535	-0.36383	-0.0767701	-0.110941	-0.0123214
rang	0.0325476	-0.136129	0.563893	-0.0763444	0.273488	0.127967	-0.35178	0.464567	-0.0295093	-0.256907	-0.0550884	-0.219453	-0.390039	-0.255089	-0.356249	0.249784	-0.260916	-0.37388	-0.183207	-0.380279	-0.130223	0.25532	-0.0513992	-0.269826	-0.193294	0.124535	1	-0.226391	-0.0472036	0.0179051	-0.216713
secdf	-0.0426163	0.0166334	-0.116687	-0.0663905	0.0835487	0.00648482	0.0224665	-0.0204476	0.111412	-0.01794	0.0640811	-0.0151678	0.300872	0.20891	0.280661	-0.201053	0.225453	0.297488	0.260746	0.214147	0.0776393	-0.0418722	-0.0332198	0.178381	0.243422	-0.36383	-0.226391	1	-0.259012	-0.0740752	0.0752449
secdn	0.00325882	0.180275	0.00618046	0.12112	-0.151035	0.20356	0.178225	-0.066501	0.0283315	0.236645	0.156342	0.20077	-0.309791	-0.271965	-0.309586	0.160905	-0.294864	-0.304387	-0.412347	0.00681505	0.164887	0.0198183	-0.140349	0.00612425	-0.303116	-0.0767701	-0.0472036	-0.259012	1	-0.0170056	-0.126846
slope	-0.0566092	-0.258102	-0.190838	0.163285	-0.23884	-0.482487	-0.0363072	-0.263932	-0.312952	-0.112542	-0.419168	-0.107396	0.12241	0.072152	0.137339	0.00623763	0.0875608	0.133113	0.112211	0.068995	-0.135821	0.420332	0.0608452	0.0233935	0.202139	-0.110941	0.0179051	-0.0740752	-0.0170056	1	-0.195106
urban	-0.0269602	-0.205495	-0.120712	-0.376477	0.309891	-0.0763583	-0.183172	0.151934	-0.177899	-0.123442	-0.0595826	-0.258422	-0.0450517	-0.180357	0.169583	-0.28285	-0.176226	0.160797	-0.159382	0.117792	-0.035481	-0.228399	-0.230308	0.059477	-0.0660136	-0.0123214	-0.216713	0.0752449	-0.126846	-0.195106	1
Note: The highlighted predictors were inputted into the formal species distribution models

## Sheet:  Anopheles quadrimaculatus
	aspect	bio1	bio2	bio3	bio4	bio5	bio6	bio7	bio8	bio9	bio10	bio11	bio12	bio13	bio14	bio15	bio16	bio17	bio18	bio19	cropland	ele	paster	POP	primf	primn	rang	secdf	secdn	slope	urban
aspect	1	-0.0599087	-0.075872	0.00462007	0.00775944	-0.136368	-0.0382823	-0.0151575	-0.0152688	-0.0499552	-0.101366	-0.0443847	0.130355	0.100472	0.0270738	0.0130317	0.144018	0.0459643	0.178679	0.0614902	-0.0494603	-0.075335	-0.163798	-0.0325024	0.202765	0.000909704	-0.0676496	0.0926287	-0.146593	0.0830994	-0.0372564
bio1	-0.0599087	1	0.287572	0.866124	-0.900451	0.844562	0.976791	-0.859723	0.542497	0.78049	0.928858	0.987435	0.392806	0.780709	-0.0167263	0.48742	0.672614	0.0343177	0.486096	0.143859	-0.341473	-0.271042	0.154648	0.0914341	-0.25642	0.547276	0.179084	-0.0810167	0.0572308	-0.244683	-0.179823
bio2	-0.075872	0.287572	1	0.407708	-0.185465	0.525728	0.185896	0.00904671	0.0786257	0.235527	0.344076	0.261597	-0.119213	0.050267	-0.156127	0.22979	0.0119482	-0.169083	-0.0953698	-0.0687363	-0.0774202	0.448769	0.254765	0.174371	-0.177038	0.146706	0.376743	0.0602093	0.11738	0.150699	-0.174436
bio3	0.00462007	0.866124	0.407708	1	-0.955811	0.57896	0.902221	-0.889235	0.423332	0.748226	0.653363	0.916585	0.409091	0.831465	-0.0725429	0.607453	0.774455	-0.022442	0.610994	0.127242	-0.420082	-0.0188371	-0.0496083	-0.00694872	-0.126222	0.607833	0.120256	0.077435	0.0639209	-0.102808	-0.203117
bio4	0.00775944	-0.900451	-0.185465	-0.955811	1	-0.55712	-0.963243	0.978234	-0.408865	-0.807241	-0.677454	-0.957039	-0.491885	-0.842776	-0.0607502	-0.492522	-0.771941	-0.114792	-0.606437	-0.236956	0.492112	0.177397	0.0644635	0.0176015	0.110082	-0.584962	-0.0480164	-0.100456	-0.0570273	0.144099	0.153213
bio5	-0.136368	0.844562	0.525728	0.57896	-0.55712	1	0.726195	-0.463132	0.491806	0.567833	0.965027	0.76413	0.102067	0.431476	-0.10548	0.337163	0.302142	-0.0827851	0.113742	-0.0101635	-0.127436	-0.15407	0.415092	0.208524	-0.392078	0.379063	0.347341	-0.24128	0.108925	-0.218678	-0.14156
bio6	-0.0382823	0.976791	0.185896	0.902221	-0.963243	0.726195	1	-0.945638	0.49303	0.816007	0.838699	0.995352	0.468096	0.816892	0.0572645	0.456091	0.724397	0.112397	0.549062	0.222459	-0.416219	-0.290044	0.0525895	0.0559439	-0.199849	0.566866	0.0973078	-0.00189182	0.0554608	-0.221055	-0.153209
bio7	-0.0151575	-0.859723	0.00904671	-0.889235	0.978234	-0.463132	-0.945638	1	-0.402948	-0.783354	-0.624713	-0.9217	-0.555171	-0.848999	-0.123722	-0.428482	-0.79094	-0.18406	-0.654027	-0.291596	0.476292	0.301033	0.128565	0.0265222	0.0721649	-0.551468	0.0388654	-0.1117	-0.0199707	0.181531	0.130546
bio8	-0.0152688	0.542497	0.0786257	0.423332	-0.408865	0.491806	0.49303	-0.402948	1	0.0340717	0.551774	0.49987	-0.0311354	0.429297	-0.407002	0.522333	0.368845	-0.350197	0.415334	-0.36797	0.0462949	-0.106651	0.157067	0.0706713	-0.215705	0.3646	0.141086	-0.332081	0.0760403	-0.19141	-0.110223
bio9	-0.0499552	0.78049	0.235527	0.748226	-0.807241	0.567833	0.816007	-0.783354	0.0340717	1	0.650154	0.813124	0.594851	0.658475	0.342792	0.186451	0.603918	0.371096	0.395796	0.533214	-0.472127	-0.282392	-0.044738	0.0861641	-0.0873054	0.351387	0.0617922	0.257558	-0.0275117	-0.139064	-0.176376
bio10	-0.101366	0.928858	0.344076	0.653363	-0.677454	0.965027	0.838699	-0.624713	0.551774	0.650154	1	0.861512	0.255895	0.590434	-0.0467664	0.374012	0.468169	-0.00856512	0.288783	0.0689717	-0.184537	-0.305686	0.323646	0.187638	-0.343572	0.426094	0.257024	-0.204655	0.0501977	-0.28252	-0.156779
bio11	-0.0443847	0.987435	0.261597	0.916585	-0.957039	0.76413	0.995352	-0.9217	0.49987	0.813124	0.861512	1	0.440299	0.814913	0.0232941	0.48746	0.717841	0.0757426	0.533582	0.190773	-0.413607	-0.245982	0.0818484	0.0596553	-0.209874	0.572721	0.134115	-0.010909	0.0587033	-0.212491	-0.169707
bio12	0.130355	0.392806	-0.119213	0.409091	-0.491885	0.102067	0.468096	-0.555171	-0.0311354	0.594851	0.255895	0.440299	1	0.630298	0.708896	-0.191696	0.710982	0.760874	0.68207	0.800395	-0.355232	-0.486784	-0.35607	0.232455	0.227976	0.00981651	-0.315653	0.540594	-0.314475	-0.105636	-0.0970903
bio13	0.100472	0.780709	0.050267	0.831465	-0.842776	0.431476	0.816892	-0.848999	0.429297	0.658475	0.590434	0.814913	0.630298	1	-0.00558578	0.599628	0.966427	0.0579999	0.844746	0.172153	-0.306378	-0.265023	-0.147761	0.0277429	-0.0785051	0.526391	-0.0426705	0.0589502	-0.0811673	-0.211062	-0.241576
bio14	0.0270738	-0.0167263	-0.156127	-0.0725429	-0.0607502	-0.10548	0.0572645	-0.123722	-0.407002	0.342792	-0.0467664	0.0232941	0.708896	-0.00558578	1	-0.766456	0.0668116	0.985421	0.0709138	0.906948	-0.363509	-0.418293	-0.212253	0.183123	0.325224	-0.322278	-0.360989	0.632746	-0.256304	0.053887	0.116556
bio15	0.0130317	0.48742	0.22979	0.607453	-0.492522	0.337163	0.456091	-0.428482	0.522333	0.186451	0.374012	0.48746	-0.191696	0.599628	-0.766456	1	0.525632	-0.736856	0.424067	-0.589864	0.0542235	0.250948	0.0506604	-0.162645	-0.309456	0.583129	0.293274	-0.427362	0.152171	-0.138912	-0.222788
bio16	0.144018	0.672614	0.0119482	0.774455	-0.771941	0.302142	0.724397	-0.79094	0.368845	0.603918	0.468169	0.717841	0.710982	0.966427	0.0668116	0.525632	1	0.133455	0.923185	0.234317	-0.285144	-0.284084	-0.265581	0.0840657	-0.00070522	0.478188	-0.13183	0.138483	-0.150937	-0.210675	-0.218324
bio17	0.0459643	0.0343177	-0.169083	-0.022442	-0.114792	-0.0827851	0.112397	-0.18406	-0.350197	0.371096	-0.00856512	0.0757426	0.760874	0.0579999	0.985421	-0.736856	0.133455	1	0.147324	0.92749	-0.366944	-0.457281	-0.243607	0.207	0.326445	-0.299094	-0.361073	0.638203	-0.260465	0.0268708	0.0913129
bio18	0.178679	0.486096	-0.0953698	0.610994	-0.606437	0.113742	0.549062	-0.654027	0.415334	0.395796	0.288783	0.533582	0.68207	0.844746	0.0709138	0.424067	0.923185	0.147324	1	0.18402	-0.210464	-0.346182	-0.405117	0.118238	0.109998	0.353287	-0.176855	0.208587	-0.195438	-0.198106	-0.2066
bio19	0.0614902	0.143859	-0.0687363	0.127242	-0.236956	-0.0101635	0.222459	-0.291596	-0.36797	0.533214	0.0689717	0.190773	0.800395	0.172153	0.906948	-0.589864	0.234317	0.92749	0.18402	1	-0.377294	-0.440327	-0.294087	0.175737	0.324095	-0.253152	-0.300952	0.666273	-0.254448	0.0169137	-0.00571489
cropland	-0.0494603	-0.341473	-0.0774202	-0.420082	0.492112	-0.127436	-0.416219	0.476292	0.0462949	-0.472127	-0.184537	-0.413607	-0.355232	-0.306378	-0.363509	0.0542235	-0.285144	-0.366944	-0.210464	-0.377294	1	0.142623	0.164691	-0.01165	-0.336281	-0.300385	0.136047	-0.479157	0.0512614	-0.156074	-0.257416
ele	-0.075335	-0.271042	0.448769	-0.0188371	0.177397	-0.15407	-0.290044	0.301033	-0.106651	-0.282392	-0.305686	-0.245982	-0.486784	-0.265023	-0.418293	0.250948	-0.284084	-0.457281	-0.346182	-0.440327	0.142623	1	0.160968	-0.1538	-0.128256	0.0581892	0.177198	-0.233856	0.24478	0.302801	0.077821
paster	-0.163798	0.154648	0.254765	-0.0496083	0.0644635	0.415092	0.0525895	0.128565	0.157067	-0.044738	0.323646	0.0818484	-0.35607	-0.147761	-0.212253	0.0506604	-0.265581	-0.243607	-0.405117	-0.294087	0.164691	0.160968	1	0.127295	-0.495754	0.0719165	0.0288602	-0.409921	0.236088	0.0292282	-0.141101
POP	-0.0325024	0.0914341	0.174371	-0.00694872	0.0176015	0.208524	0.0559439	0.0265222	0.0706713	0.0861641	0.187638	0.0596553	0.232455	0.0277429	0.183123	-0.162645	0.0840657	0.207	0.118238	0.175737	-0.01165	-0.1538	0.127295	1	-0.388853	-0.0665589	-0.0444788	0.150159	-0.0448561	-0.0622783	0.096618
primf	0.202765	-0.25642	-0.177038	-0.126222	0.110082	-0.392078	-0.199849	0.0721649	-0.215705	-0.0873054	-0.343572	-0.209874	0.227976	-0.0785051	0.325224	-0.309456	-0.00070522	0.326445	0.109998	0.324095	-0.336281	-0.128256	-0.495754	-0.388853	1	-0.341494	-0.251782	0.512469	-0.298837	0.140449	0.138127
primn	0.000909704	0.547276	0.146706	0.607833	-0.584962	0.379063	0.566866	-0.551468	0.3646	0.351387	0.426094	0.572721	0.00981651	0.526391	-0.322278	0.583129	0.478188	-0.299094	0.353287	-0.253152	-0.300385	0.0581892	0.0719165	-0.0665589	-0.341494	1	-0.00703121	-0.39365	0.224715	-0.0965899	-0.0471248
rang	-0.0676496	0.179084	0.376743	0.120256	-0.0480164	0.347341	0.0973078	0.0388654	0.141086	0.0617922	0.257024	0.134115	-0.315653	-0.0426705	-0.360989	0.293274	-0.13183	-0.361073	-0.176855	-0.300952	0.136047	0.177198	0.0288602	-0.0444788	-0.251782	-0.00703121	1	-0.258572	0.162086	0.010022	-0.262004
secdf	0.0926287	-0.0810167	0.0602093	0.077435	-0.100456	-0.24128	-0.00189182	-0.1117	-0.332081	0.257558	-0.204655	-0.010909	0.540594	0.0589502	0.632746	-0.427362	0.138483	0.638203	0.208587	0.666273	-0.479157	-0.233856	-0.409921	0.150159	0.512469	-0.39365	-0.258572	1	-0.3247	0.247507	-0.100449
secdn	-0.146593	0.0572308	0.11738	0.0639209	-0.0570273	0.108925	0.0554608	-0.0199707	0.0760403	-0.0275117	0.0501977	0.0587033	-0.314475	-0.0811673	-0.256304	0.152171	-0.150937	-0.260465	-0.195438	-0.254448	0.0512614	0.24478	0.236088	-0.0448561	-0.298837	0.224715	0.162086	-0.3247	1	-0.0917639	-0.0317925
slope	0.0830994	-0.244683	0.150699	-0.102808	0.144099	-0.218678	-0.221055	0.181531	-0.19141	-0.139064	-0.28252	-0.212491	-0.105636	-0.211062	0.053887	-0.138912	-0.210675	0.0268708	-0.198106	0.0169137	-0.156074	0.302801	0.0292282	-0.0622783	0.140449	-0.0965899	0.010022	0.247507	-0.0917639	1	-0.0432576
urban	-0.0372564	-0.179823	-0.174436	-0.203117	0.153213	-0.14156	-0.153209	0.130546	-0.110223	-0.176376	-0.156779	-0.169707	-0.0970903	-0.241576	0.116556	-0.222788	-0.218324	0.0913129	-0.2066	-0.00571489	-0.257416	0.077821	-0.141101	0.096618	0.138127	-0.0471248	-0.262004	-0.100449	-0.0317925	-0.0432576	1
Note: The highlighted predictors were inputted into the formal species distribution models

## Sheet: Vespula vulgaris
	aspect	bio1	bio2	bio3	bio4	bio5	bio6	bio7	bio8	bio9	bio10	bio11	bio12	bio13	bio14	bio15	bio16	bio17	bio18	bio19	cropland	ele	paster	POP	primf	primn	rang	secdf	secdn	slope	urban
aspect	1	0.0631047	-0.0277851	0.0411486	-0.0548853	0.00844809	0.0677406	-0.0605333	-0.0264434	0.0742946	0.028898	0.0648691	0.0936947	0.0842334	0.0794189	-0.0237708	0.0848977	0.0830084	0.0481051	0.0993268	0.00267889	0.0145492	0.0338976	0.0416455	0.00818389	-0.0418771	0.021894	-0.0223815	0.0277404	0.0400092	-0.000574429
bio1	0.0631047	1	0.00391761	0.678197	-0.672455	0.518989	0.904393	-0.620471	-0.0586686	0.776997	0.686643	0.931403	0.183389	0.114243	0.222183	-0.263065	0.121712	0.239259	-0.149971	0.3251	0.360835	-0.269009	0.367594	0.392608	-0.117045	-0.221955	0.0794135	-0.492657	0.239092	-0.165679	0.234866
bio2	-0.0277851	0.00391761	1	0.248928	0.304394	0.550445	-0.272896	0.513938	0.275139	-0.0874906	0.289157	-0.157157	-0.110699	-0.0255845	-0.156212	0.236856	-0.0634749	-0.125427	0.0203107	-0.171151	-0.0208043	0.393936	-0.17963	-0.179373	0.122556	0.165459	0.196289	0.0841379	-0.00517346	0.12672	-0.05238
bio3	0.0411486	0.678197	0.248928	1	-0.813305	0.0615251	0.733308	-0.669116	-0.331588	0.711662	0.100596	0.795581	0.445558	0.379401	0.460546	-0.202992	0.383717	0.482748	0.0689488	0.564971	0.0386391	0.101706	0.443851	0.216546	0.176615	-0.173849	0.40523	-0.305284	-0.041659	0.161031	0.0718112
bio4	-0.0548853	-0.672455	0.304394	-0.813305	1	0.242751	-0.901394	0.969605	0.504709	-0.760252	0.0725753	-0.89396	-0.463141	-0.337891	-0.520885	0.382313	-0.365294	-0.526102	-0.0324334	-0.60407	-0.0691687	0.0618576	-0.492992	-0.362423	-0.0784515	0.242168	-0.252169	0.348609	-0.00546707	-0.110341	-0.0769358
bio5	0.00844809	0.518989	0.550445	0.0615251	0.242751	1	0.134639	0.334009	0.45184	0.177841	0.942603	0.196435	-0.315724	-0.261321	-0.327332	0.0809509	-0.288736	-0.304605	-0.288605	-0.275557	0.363987	-0.17131	-0.117721	0.0677749	-0.203452	0.0537221	-0.143014	-0.21849	0.288147	-0.294936	0.17787
bio6	0.0677406	0.904393	-0.272896	0.733308	-0.901394	0.134639	1	-0.889017	-0.308055	0.82275	0.339949	0.988892	0.307464	0.192945	0.37412	-0.393137	0.215786	0.38061	-0.106086	0.472074	0.274693	-0.236253	0.466434	0.453892	-0.0762284	-0.265472	0.107941	-0.472898	0.180382	-0.0727573	0.179593
bio7	-0.0605333	-0.620471	0.513938	-0.669116	0.969605	0.334009	-0.889017	1	0.501819	-0.700449	0.11219	-0.849896	-0.43836	-0.304287	-0.507129	0.41137	-0.338682	-0.5028	-0.0324463	-0.576381	-0.093105	0.145572	-0.498083	-0.400438	-0.0215007	0.277349	-0.168761	0.348874	-0.0384371	-0.0670757	-0.0886444
bio8	-0.0264434	-0.0586686	0.275139	-0.331588	0.504709	0.45184	-0.308055	0.501819	1	-0.467786	0.406136	-0.289004	-0.339469	-0.231791	-0.382657	0.25126	-0.254571	-0.386954	0.0793035	-0.494229	0.166606	-0.0839679	-0.246856	-0.136179	-0.174241	0.121281	-0.156353	-0.0231033	0.165822	-0.188144	0.0304762
bio9	0.0742946	0.776997	-0.0874906	0.711662	-0.760252	0.177841	0.82275	-0.700449	-0.467786	1	0.31195	0.846153	0.355891	0.277315	0.357847	-0.216833	0.28641	0.383033	-0.185248	0.578895	0.0860761	-0.0960635	0.378222	0.226841	0.0630674	-0.168798	0.188833	-0.336964	0.0529346	0.038343	0.100701
bio10	0.028898	0.686643	0.289157	0.100596	0.0725753	0.942603	0.339949	0.11219	0.406136	0.31195	1	0.381382	-0.231248	-0.202355	-0.235308	0.0148753	-0.219108	-0.217943	-0.269483	-0.167846	0.410482	-0.318937	-0.00536104	0.163239	-0.250325	-0.0383794	-0.162787	-0.31397	0.315846	-0.347868	0.238183
bio11	0.0648691	0.931403	-0.157157	0.795581	-0.89396	0.196435	0.988892	-0.849896	-0.289004	0.846153	0.381382	1	0.324676	0.221265	0.376161	-0.347569	0.23956	0.388646	-0.0925867	0.484111	0.253008	-0.194523	0.458036	0.414622	-0.0437705	-0.24148	0.159354	-0.468157	0.14739	-0.0492746	0.178919
bio12	0.0936947	0.183389	-0.110699	0.445558	-0.463141	-0.315724	0.307464	-0.43836	-0.339469	0.355891	-0.231248	0.324676	1	0.947545	0.891238	-0.0332868	0.958851	0.91121	0.748269	0.903415	-0.382787	0.283884	0.167539	-0.0108387	0.452645	-0.211765	0.364759	0.117182	-0.202322	0.463585	-0.0674569
bio13	0.0842334	0.114243	-0.0255845	0.379401	-0.337891	-0.261321	0.192945	-0.304287	-0.231791	0.277315	-0.202355	0.221265	0.947545	1	0.733328	0.24481	0.993933	0.758899	0.72879	0.861298	-0.414406	0.324457	0.0908748	-0.106809	0.457563	-0.143897	0.343792	0.176497	-0.253604	0.479402	-0.0947991
bio14	0.0794189	0.222183	-0.156212	0.460546	-0.520885	-0.327332	0.37412	-0.507129	-0.382657	0.357847	-0.235308	0.376161	0.891238	0.733328	1	-0.389372	0.752227	0.989528	0.70054	0.779211	-0.264311	0.217906	0.265834	0.125041	0.353284	-0.270168	0.3333	0.00160523	-0.0635716	0.354056	-0.0235398
bio15	-0.0237708	-0.263065	0.236856	-0.202992	0.382313	0.0809509	-0.393137	0.41137	0.25126	-0.216833	0.0148753	-0.347569	-0.0332868	0.24481	-0.389372	1	0.218112	-0.369726	0.0416623	-0.0340691	-0.25424	0.190461	-0.210647	-0.393787	0.098512	0.241916	0.0406446	0.248785	-0.297449	0.150592	-0.113504
bio16	0.0848977	0.121712	-0.0634749	0.383717	-0.365294	-0.288736	0.215786	-0.338682	-0.254571	0.28641	-0.219108	0.23956	0.958851	0.993933	0.752227	0.218112	1	0.773108	0.73571	0.874924	-0.411017	0.313956	0.123591	-0.082959	0.437019	-0.158474	0.340856	0.17437	-0.259292	0.47751	-0.0872601
bio17	0.0830084	0.239259	-0.125427	0.482748	-0.526102	-0.304605	0.38061	-0.5028	-0.386954	0.383033	-0.217943	0.388646	0.91121	0.758899	0.989528	-0.369726	0.773108	1	0.702195	0.797058	-0.274617	0.23352	0.231583	0.109929	0.398535	-0.272627	0.349128	0.00868042	-0.0727006	0.381106	-0.0211818
bio18	0.0481051	-0.149971	0.0203107	0.0689488	-0.0324334	-0.288605	-0.106086	-0.0324463	0.0793035	-0.185248	-0.269483	-0.0925867	0.748269	0.72879	0.70054	0.0416623	0.73571	0.702195	1	0.429964	-0.362867	0.411353	-0.000264119	-0.0563177	0.308353	-0.152084	0.2404	0.283761	-0.15708	0.465937	-0.101613
bio19	0.0993268	0.3251	-0.171151	0.564971	-0.60407	-0.275557	0.472074	-0.576381	-0.494229	0.578895	-0.167846	0.484111	0.903415	0.861298	0.779211	-0.0340691	0.874924	0.797058	0.429964	1	-0.307658	0.139942	0.252376	0.0272466	0.39389	-0.197459	0.35146	-0.00586608	-0.172691	0.336767	-0.0320746
cropland	0.00267889	0.360835	-0.0208043	0.0386391	-0.0691687	0.363987	0.274693	-0.093105	0.166606	0.0860761	0.410482	0.253008	-0.382787	-0.414406	-0.264311	-0.25424	-0.411017	-0.274617	-0.362867	-0.307658	1	-0.335063	0.23177	0.330174	-0.324268	-0.199329	-0.23506	-0.48343	0.237608	-0.398058	0.0747685
ele	0.0145492	-0.269009	0.393936	0.101706	0.0618576	-0.17131	-0.236253	0.145572	-0.0839679	-0.0960635	-0.318937	-0.194523	0.283884	0.324457	0.217906	0.190461	0.313956	0.23352	0.411353	0.139942	-0.335063	1	-0.124127	-0.0662523	0.154931	0.087492	0.288576	0.253743	-0.0962827	0.749128	-0.175808
paster	0.0338976	0.367594	-0.17963	0.443851	-0.492992	-0.117721	0.466434	-0.498083	-0.246856	0.378222	-0.00536104	0.458036	0.167539	0.0908748	0.265834	-0.210647	0.123591	0.231583	-0.000264119	0.252376	0.23177	-0.124127	1	0.368401	-0.203105	-0.27839	0.0230122	-0.260348	-0.137741	-0.0887596	-0.0145061
POP	0.0416455	0.392608	-0.179373	0.216546	-0.362423	0.0677749	0.453892	-0.400438	-0.136179	0.226841	0.163239	0.414622	-0.0108387	-0.106809	0.125041	-0.393787	-0.082959	0.109929	-0.0563177	0.0272466	0.330174	-0.0662523	0.368401	1	-0.307858	-0.334101	-0.13578	-0.304501	0.426283	-0.102063	0.188364
primf	0.00818389	-0.117045	0.122556	0.176615	-0.0784515	-0.203452	-0.0762284	-0.0215007	-0.174241	0.0630674	-0.250325	-0.0437705	0.452645	0.457563	0.353284	0.098512	0.437019	0.398535	0.308353	0.39389	-0.324268	0.154931	-0.203105	-0.307858	1	-0.0948411	0.162385	0.0510711	-0.208291	0.273023	-0.0781815
primn	-0.0418771	-0.221955	0.165459	-0.173849	0.242168	0.0537221	-0.265472	0.277349	0.121281	-0.168798	-0.0383794	-0.24148	-0.211765	-0.143897	-0.270168	0.241916	-0.158474	-0.272627	-0.152084	-0.197459	-0.199329	0.087492	-0.27839	-0.334101	-0.0948411	1	-0.0220475	-0.23086	-0.154963	-0.0338973	-0.106735
rang	0.021894	0.0794135	0.196289	0.40523	-0.252169	-0.143014	0.107941	-0.168761	-0.156353	0.188833	-0.162787	0.159354	0.364759	0.343792	0.3333	0.0406446	0.340856	0.349128	0.2404	0.35146	-0.23506	0.288576	0.0230122	-0.13578	0.162385	-0.0220475	1	-0.0322167	-0.20442	0.345383	-0.103792
secdf	-0.0223815	-0.492657	0.0841379	-0.305284	0.348609	-0.21849	-0.472898	0.348874	-0.0231033	-0.336964	-0.31397	-0.468157	0.117182	0.176497	0.00160523	0.248785	0.17437	0.00868042	0.283761	-0.00586608	-0.48343	0.253743	-0.260348	-0.304501	0.0510711	-0.23086	-0.0322167	1	-0.465416	0.268878	-0.164973
secdn	0.0277404	0.239092	-0.00517346	-0.041659	-0.00546707	0.288147	0.180382	-0.0384371	0.165822	0.0529346	0.315846	0.14739	-0.202322	-0.253604	-0.0635716	-0.297449	-0.259292	-0.0727006	-0.15708	-0.172691	0.237608	-0.0962827	-0.137741	0.426283	-0.208291	-0.154963	-0.20442	-0.465416	1	-0.172461	0.144381
slope	0.0400092	-0.165679	0.12672	0.161031	-0.110341	-0.294936	-0.0727573	-0.0670757	-0.188144	0.038343	-0.347868	-0.0492746	0.463585	0.479402	0.354056	0.150592	0.47751	0.381106	0.465937	0.336767	-0.398058	0.749128	-0.0887596	-0.102063	0.273023	-0.0338973	0.345383	0.268878	-0.172461	1	-0.160638
urban	-0.000574429	0.234866	-0.05238	0.0718112	-0.0769358	0.17787	0.179593	-0.0886444	0.0304762	0.100701	0.238183	0.178919	-0.0674569	-0.0947991	-0.0235398	-0.113504	-0.0872601	-0.0211818	-0.101613	-0.0320746	0.0747685	-0.175808	-0.0145061	0.188364	-0.0781815	-0.106735	-0.103792	-0.164973	0.144381	-0.160638	1
Note: The highlighted predictors were inputted into the formal species distribution models

## Sheet:  Anoplolepis gracilipes
	aspect	bio1	bio2	bio3	bio4	bio5	bio6	bio7	bio8	bio9	bio10	bio11	bio12	bio13	bio14	bio15	bio16	bio17	bio18	bio19	cropland	ele	paster	POP	primf	primn	rang	secdf	secdn	slope	urban
aspect	1	0.0120731	-0.0345053	-0.0649949	0.0638855	0.024719	-0.0140517	0.0273788	0.104481	-0.0240886	0.0692935	-0.0191539	-0.0153993	0.0347831	-0.0649958	0.0609743	0.0432045	-0.071739	0.0733678	-0.0277126	0.0302706	-0.0938723	0.117162	0.0319856	0.0149304	-0.0814547	0.0484032	0.0204928	-0.0474329	-0.0391526	-0.00158055
bio1	0.0120731	1	-0.0106939	0.550077	-0.65145	0.697549	0.862016	-0.493317	0.740014	0.927111	0.798105	0.936155	0.29158	0.1928	0.0531906	-0.0462504	0.23231	0.0423756	-0.302912	0.271613	0.32484	-0.476563	-0.444118	-0.0806221	-0.117752	0.0571967	-0.216224	0.0649059	0.0208747	-0.45818	0.0118601
bio2	-0.0345053	-0.0106939	1	0.219015	-0.0946819	0.438112	-0.286453	0.522877	-0.0896758	-0.00694515	-0.105047	0.0263118	-0.389413	-0.18816	-0.325792	0.43563	-0.166416	-0.411072	-0.292102	-0.301902	0.339138	0.492964	-0.0339024	-0.243044	-0.0899826	0.35692	0.275933	-0.0573718	0.381626	-0.0644783	-0.0162581
bio3	-0.0649949	0.550077	0.219015	1	-0.936506	0.070554	0.730874	-0.697355	0.0546126	0.743465	-0.0218991	0.777776	0.381575	0.00240669	0.441023	-0.370732	0.0714641	0.427096	-0.155251	0.354094	0.0388205	0.000957426	-0.362648	-0.269513	0.239788	-0.153216	-0.0521445	0.081078	-0.0403099	-0.088447	-0.0905966
bio4	0.0638855	-0.65145	-0.0946819	-0.936506	1	-0.11803	-0.837417	0.779085	-0.0648154	-0.847756	-0.0708094	-0.87433	-0.379453	-0.0908824	-0.326836	0.320754	-0.133958	-0.329709	0.288499	-0.392857	-0.0627121	0.0693125	0.450897	0.283997	-0.15322	0.0939584	0.147245	-0.105974	0.0380972	0.0959052	0.135798
bio5	0.024719	0.697549	0.438112	0.070554	-0.11803	1	0.277252	0.256931	0.707878	0.49966	0.827608	0.498439	-0.146698	0.0718941	-0.373346	0.400326	0.084743	-0.426403	-0.426858	-0.0702747	0.530897	-0.200809	-0.264847	-0.0360007	-0.313337	0.3762	-0.0294014	-0.0198584	0.289138	-0.495906	0.0884936
bio6	-0.0140517	0.862016	-0.286453	0.730874	-0.837417	0.277252	1	-0.857308	0.447515	0.941689	0.48563	0.940259	0.487621	0.196234	0.33935	-0.357586	0.23171	0.364021	-0.215817	0.486923	0.0780814	-0.448909	-0.443153	-0.111278	0.0614031	-0.157574	-0.248287	0.101953	-0.146251	-0.280611	-0.0479267
bio7	0.0273788	-0.493317	0.522877	-0.697355	0.779085	0.256931	-0.857308	1	-0.0708514	-0.679487	-0.0450377	-0.678703	-0.569081	-0.158863	-0.541382	0.574181	-0.187663	-0.594626	-0.0116322	-0.527432	0.20592	0.343945	0.303844	0.0926404	-0.229652	0.360069	0.233989	-0.113191	0.302031	0.0165457	0.0956233
bio8	0.104481	0.740014	-0.0896758	0.0546126	-0.0648154	0.707878	0.447515	-0.0708514	1	0.471513	0.900376	0.497546	0.133412	0.102562	-0.0695655	0.099878	0.161674	-0.0952601	0.103074	-0.0551049	0.271242	-0.566836	-0.123007	0.131391	-0.130215	0.0419031	-0.115362	-0.056047	-0.019436	-0.494727	0.0808096
bio9	-0.0240886	0.927111	-0.00694515	0.743465	-0.847756	0.49966	0.941689	-0.679487	0.471513	1	0.5639	0.985186	0.345899	0.180597	0.182546	-0.159	0.205529	0.18798	-0.405479	0.423459	0.225638	-0.36782	-0.484395	-0.182158	-0.0524718	-0.0041627	-0.16653	0.0851957	0.00216632	-0.361144	-0.0259756
bio10	0.0692935	0.798105	-0.105047	-0.0218991	-0.0708094	0.827608	0.48563	-0.0450377	0.900376	0.5639	1	0.545468	0.08841	0.205229	-0.193512	0.207105	0.214135	-0.207943	-0.218061	0.0846427	0.375317	-0.574384	-0.240237	0.107747	-0.29026	0.151499	-0.147455	0.0073286	0.0561836	-0.533154	0.122897
bio11	-0.0191539	0.936155	0.0263118	0.777776	-0.87433	0.498439	0.940259	-0.678703	0.497546	0.985186	0.545468	1	0.365688	0.1761	0.181712	-0.170712	0.21837	0.177346	-0.337866	0.36985	0.232071	-0.340035	-0.49129	-0.183628	-0.00877661	-0.00880577	-0.197713	0.0951388	-0.00889485	-0.339798	-0.0562655
bio12	-0.0153993	0.29158	-0.389413	0.381575	-0.379453	-0.146698	0.487621	-0.569081	0.133412	0.345899	0.08841	0.365688	1	0.684442	0.542317	-0.334026	0.75873	0.567444	0.384714	0.664947	-0.171339	-0.258613	-0.102431	0.0402076	0.314762	-0.427915	-0.331358	0.25874	-0.27046	-0.0136381	-0.0180508
bio13	0.0347831	0.1928	-0.18816	0.00240669	-0.0908824	0.0718941	0.196234	-0.158863	0.102562	0.180597	0.205229	0.1761	0.684442	1	-0.0940999	0.384582	0.98133	-0.0903371	0.0723588	0.58804	-0.0389568	-0.201165	-0.0461159	0.070164	-0.021635	-0.248009	-0.19798	0.352292	-0.101338	-0.0759314	-0.00226246
bio14	-0.0649958	0.0531906	-0.325792	0.441023	-0.326836	-0.373346	0.33935	-0.541382	-0.0695655	0.182546	-0.193512	0.181712	0.542317	-0.0940999	1	-0.793682	-0.0224756	0.974254	0.341717	0.351803	-0.3007	-0.133842	-0.0801755	-0.033493	0.404349	-0.303328	-0.121351	-0.121652	-0.194872	0.0964647	0.0017816
bio15	0.0609743	-0.0462504	0.43563	-0.370732	0.320754	0.400326	-0.357586	0.574181	0.099878	-0.159	0.207105	-0.170712	-0.334026	0.384582	-0.793682	1	0.313541	-0.835417	-0.284943	-0.176264	0.207394	0.112303	0.0784446	0.0323227	-0.399341	0.243424	0.268247	0.0932324	0.24093	-0.131191	0.00727555
bio16	0.0432045	0.23231	-0.166416	0.0714641	-0.133958	0.084743	0.23171	-0.187663	0.161674	0.205529	0.214135	0.21837	0.75873	0.98133	-0.0224756	0.313541	1	-0.0307239	0.167302	0.55964	-0.028075	-0.198134	-0.0333809	0.0666894	0.0545292	-0.286235	-0.241387	0.350983	-0.121599	-0.0779495	-0.00366187
bio17	-0.071739	0.0423756	-0.411072	0.427096	-0.329709	-0.426403	0.364021	-0.594626	-0.0952601	0.18798	-0.207943	0.177346	0.567444	-0.0903371	0.974254	-0.835417	-0.0307239	1	0.351921	0.375835	-0.31857	-0.154148	-0.0713964	-0.0209967	0.408079	-0.335457	-0.141704	-0.119009	-0.22066	0.109355	0.018472
bio18	0.0733678	-0.302912	-0.292102	-0.155251	0.288499	-0.426858	-0.215817	-0.0116322	0.103074	-0.405479	-0.218061	-0.337866	0.384714	0.0723588	0.341717	-0.284943	0.167302	0.351921	1	-0.172731	-0.261339	-0.0991471	0.397896	0.201103	0.337512	-0.339146	-0.166998	-0.0860422	-0.281662	0.15819	0.0236308
bio19	-0.0277126	0.271613	-0.301902	0.354094	-0.392857	-0.0702747	0.486923	-0.527432	-0.0551049	0.423459	0.0846427	0.36985	0.664947	0.58804	0.351803	-0.176264	0.55964	0.375835	-0.172731	1	-0.160465	-0.208271	-0.202926	-0.0244387	0.0932634	-0.246829	-0.126011	0.346941	-0.132518	-0.0860879	-0.0207042
cropland	0.0302706	0.32484	0.339138	0.0388205	-0.0627121	0.530897	0.0780814	0.20592	0.271242	0.225638	0.375317	0.232071	-0.171339	-0.0389568	-0.3007	0.207394	-0.028075	-0.31857	-0.261339	-0.160465	1	0.0113467	0.0506152	-0.0959289	-0.186949	0.0641769	-0.0865919	0.0927376	0.246567	-0.29665	0.0418877
ele	-0.0938723	-0.476563	0.492964	0.000957426	0.0693125	-0.200809	-0.448909	0.343945	-0.566836	-0.36782	-0.574384	-0.340035	-0.258613	-0.201165	-0.133842	0.112303	-0.198134	-0.154148	-0.0991471	-0.208271	0.0113467	1	0.0583299	-0.09091	0.15213	0.176391	0.103311	-0.0351895	0.175694	0.555819	-0.0513466
paster	0.117162	-0.444118	-0.0339024	-0.362648	0.450897	-0.264847	-0.443153	0.303844	-0.123007	-0.484395	-0.240237	-0.49129	-0.102431	-0.0461159	-0.0801755	0.0784446	-0.0333809	-0.0713964	0.397896	-0.202926	0.0506152	0.0583299	1	0.0223827	0.0251817	-0.148663	-0.0129106	-0.0911305	-0.0583719	0.0293616	0.0817908
POP	0.0319856	-0.0806221	-0.243044	-0.269513	0.283997	-0.0360007	-0.111278	0.0926404	0.131391	-0.182158	0.107747	-0.183628	0.0402076	0.070164	-0.033493	0.0323227	0.0666894	-0.0209967	0.201103	-0.0244387	-0.0959289	-0.09091	0.0223827	1	-0.114579	-0.0192585	-0.0585933	-0.00696567	-0.0656338	0.00983241	0.352155
primf	0.0149304	-0.117752	-0.0899826	0.239788	-0.15322	-0.313337	0.0614031	-0.229652	-0.130215	-0.0524718	-0.29026	-0.00877661	0.314762	-0.021635	0.404349	-0.399341	0.0545292	0.408079	0.337512	0.0932634	-0.186949	0.15213	0.0251817	-0.114579	1	-0.465494	-0.08706	0.0314148	-0.276661	0.283682	-0.121268
primn	-0.0814547	0.0571967	0.35692	-0.153216	0.0939584	0.3762	-0.157574	0.360069	0.0419031	-0.0041627	0.151499	-0.00880577	-0.427915	-0.248009	-0.303328	0.243424	-0.286235	-0.335457	-0.339146	-0.246829	0.0641769	0.176391	-0.148663	-0.0192585	-0.465494	1	0.038315	-0.407018	0.220103	-0.0537886	-0.0268196
rang	0.0484032	-0.216224	0.275933	-0.0521445	0.147245	-0.0294014	-0.248287	0.233989	-0.115362	-0.16653	-0.147455	-0.197713	-0.331358	-0.19798	-0.121351	0.268247	-0.241387	-0.141704	-0.166998	-0.126011	-0.0865919	0.103311	-0.0129106	-0.0585933	-0.08706	0.038315	1	-0.0794637	0.028095	-0.0269958	-0.0798857
secdf	0.0204928	0.0649059	-0.0573718	0.081078	-0.105974	-0.0198584	0.101953	-0.113191	-0.056047	0.0851957	0.0073286	0.0951388	0.25874	0.352292	-0.121652	0.0932324	0.350983	-0.119009	-0.0860422	0.346941	0.0927376	-0.0351895	-0.0911305	-0.00696567	0.0314148	-0.407018	-0.0794637	1	-0.236071	-0.00589178	-0.092199
secdn	-0.0474329	0.0208747	0.381626	-0.0403099	0.0380972	0.289138	-0.146251	0.302031	-0.019436	0.00216632	0.0561836	-0.00889485	-0.27046	-0.101338	-0.194872	0.24093	-0.121599	-0.22066	-0.281662	-0.132518	0.246567	0.175694	-0.0583719	-0.0656338	-0.276661	0.220103	0.028095	-0.236071	1	-0.142943	0.0952227
slope	-0.0391526	-0.45818	-0.0644783	-0.088447	0.0959052	-0.495906	-0.280611	0.0165457	-0.494727	-0.361144	-0.533154	-0.339798	-0.0136381	-0.0759314	0.0964647	-0.131191	-0.0779495	0.109355	0.15819	-0.0860879	-0.29665	0.555819	0.0293616	0.00983241	0.283682	-0.0537886	-0.0269958	-0.00589178	-0.142943	1	-0.154955
urban	-0.00158055	0.0118601	-0.0162581	-0.0905966	0.135798	0.0884936	-0.0479267	0.0956233	0.0808096	-0.0259756	0.122897	-0.0562655	-0.0180508	-0.00226246	0.0017816	0.00727555	-0.00366187	0.018472	0.0236308	-0.0207042	0.0418877	-0.0513466	0.0817908	0.352155	-0.121268	-0.0268196	-0.0798857	-0.092199	0.0952227	-0.154955	1
Note: The highlighted predictors were inputted into the formal species distribution models

## Sheet: Cinara cupressi
	aspect	bio1	bio2	bio3	bio4	bio5	bio6	bio7	bio8	bio9	bio10	bio11	bio12	bio13	bio14	bio15	bio16	bio17	bio18	bio19	cropland	ele	paster	POP	primf	primn	rang	secdf	secdn	slope	urban
aspect	1	-0.00785924	-0.124457	-0.0709149	-0.0461536	-0.0613128	0.0430088	-0.0875676	-0.190845	0.0219878	-0.0441845	0.0130073	0.0230306	-0.115791	0.327247	-0.220379	-0.0944568	0.293405	0.0084874	0.165323	0.0629762	-0.23087	0.00411544	0.132711	-0.0365949	-0.17175	-0.104267	-0.0499211	0.262854	-0.176325	0.123845
bio1	-0.00785924	1	0.0597591	0.744972	-0.766559	0.760762	0.933784	-0.623351	0.65069	0.827948	0.888821	0.970877	0.366814	0.547669	-0.230526	0.520318	0.512524	-0.149516	0.128798	0.254302	0.0170849	-0.253339	0.0932722	0.0106753	-0.102364	-0.0317725	0.128474	-0.220075	0.0748468	-0.363073	-0.0559184
bio2	-0.124457	0.0597591	1	0.132443	0.263778	0.506963	-0.219586	0.565545	0.163948	0.113672	0.264598	-0.0577444	-0.323722	-0.116693	-0.547453	0.37571	-0.148834	-0.535081	-0.257523	-0.25969	-0.242804	0.486755	-0.386281	-0.274408	0.0658826	0.41419	0.489179	-0.0513667	-0.284288	0.0634278	-0.348578
bio3	-0.0709149	0.744972	0.132443	1	-0.850389	0.361509	0.773697	-0.680699	0.550564	0.606946	0.454834	0.821442	0.437788	0.594747	-0.233659	0.472734	0.534592	-0.123175	0.268216	0.20721	-0.122074	0.12441	0.153888	0.0128928	0.0853965	0.0403654	0.202243	-0.11833	-0.201696	-0.0817537	-0.16096
bio4	-0.0461536	-0.766559	0.263778	-0.850389	1	-0.208349	-0.913823	0.937533	-0.443934	-0.619943	-0.390568	-0.896434	-0.504659	-0.611978	0.0417795	-0.359111	-0.577055	-0.0377174	-0.312497	-0.29544	-0.0153507	0.067289	-0.272639	-0.176517	0.160751	0.0727292	-0.0110498	0.102388	0.0136159	0.0820803	-0.030206
bio5	-0.0613128	0.760762	0.506963	0.361509	-0.208349	1	0.513416	0.0126086	0.512016	0.69667	0.949752	0.604897	0.0541024	0.258751	-0.405154	0.472297	0.231989	-0.352421	-0.184648	0.114371	0.0240353	-0.183002	-0.130619	-0.162295	-0.03944	0.114051	0.279168	-0.260003	0.0272797	-0.434123	-0.176588
bio6	0.0430088	0.933784	-0.219586	0.773697	-0.913823	0.513416	1	-0.851598	0.526783	0.790913	0.696536	0.982817	0.467971	0.577823	-0.0681068	0.384233	0.54768	0.012699	0.202777	0.337078	0.0742354	-0.286989	0.247578	0.123447	-0.181454	-0.113728	0.0250047	-0.182345	0.101463	-0.299546	0.0339612
bio7	-0.0875676	-0.623351	0.565545	-0.680699	0.937533	0.0126086	-0.851598	1	-0.301052	-0.496025	-0.231461	-0.775695	-0.512239	-0.515232	-0.168129	-0.159213	-0.496457	-0.230073	-0.349072	-0.322905	-0.0718185	0.222618	-0.368271	-0.24298	0.187341	0.202186	0.141394	0.0536493	-0.101563	0.0838526	-0.147441
bio8	-0.190845	0.65069	0.163948	0.550564	-0.443934	0.512016	0.526783	-0.301052	1	0.214912	0.606121	0.603169	0.363083	0.519793	-0.152955	0.365641	0.487174	-0.0742849	0.427374	0.0838472	-0.0535747	-0.126924	-0.0910666	-0.116724	0.121508	0.0919024	-0.0119462	-0.0512326	-0.105129	-0.236531	-0.0739352
bio9	0.0219878	0.827948	0.113672	0.606946	-0.619943	0.69667	0.790913	-0.496025	0.214912	1	0.755109	0.805029	0.208914	0.33819	-0.272885	0.423029	0.310951	-0.202129	-0.154438	0.290472	-0.0259964	-0.152201	0.131328	0.00568455	-0.161983	0.0182659	0.200032	-0.234495	0.0488753	-0.249025	-0.0757815
bio10	-0.0441845	0.888821	0.264598	0.454834	-0.390568	0.949752	0.696536	-0.231461	0.606121	0.755109	1	0.757869	0.175747	0.352598	-0.287477	0.469774	0.327469	-0.226793	-0.0483187	0.170084	0.0378783	-0.324044	-0.0434292	-0.095334	-0.0519776	0.00310679	0.173632	-0.243911	0.110171	-0.465036	-0.0948498
bio11	0.0130073	0.970877	-0.0577444	0.821442	-0.896434	0.604897	0.982817	-0.775695	0.603169	0.805029	0.757869	1	0.437209	0.598146	-0.171534	0.481942	0.561519	-0.0863798	0.194373	0.289805	0.023843	-0.200371	0.171176	0.078643	-0.140779	-0.0463746	0.0922541	-0.191927	0.0463205	-0.278964	-0.0250675
bio12	0.0230306	0.366814	-0.323722	0.437788	-0.504659	0.0541024	0.467971	-0.512239	0.363083	0.208914	0.175747	0.437209	1	0.884016	0.435824	-0.118055	0.90575	0.551434	0.651119	0.791715	0.0756704	-0.236171	0.444332	0.209815	0.277553	-0.339895	-0.114918	0.160711	-0.231993	-0.149283	0.104698
bio13	-0.115791	0.547669	-0.116693	0.594747	-0.611978	0.258751	0.577823	-0.515232	0.519793	0.33819	0.352598	0.598146	0.884016	1	0.0628135	0.306293	0.993422	0.175797	0.57982	0.605166	0.0819402	-0.0719012	0.281728	0.216768	0.225757	-0.20129	0.0100032	0.0661263	-0.283902	-0.0969177	-0.0534955
bio14	0.327247	-0.230526	-0.547453	-0.233659	0.0417795	-0.405154	-0.0681068	-0.168129	-0.152955	-0.272885	-0.287477	-0.171534	0.435824	0.0628135	1	-0.753433	0.102997	0.981842	0.477257	0.31358	0.0929951	-0.428459	0.364533	0.223257	0.0867842	-0.421305	-0.389698	0.276434	0.0624219	-0.201046	0.447767
bio15	-0.220379	0.520318	0.37571	0.472734	-0.359111	0.472297	0.384233	-0.159213	0.365641	0.423029	0.469774	0.481942	-0.118055	0.306293	-0.753433	1	0.257969	-0.735955	-0.119239	-0.196177	-0.145643	0.266446	-0.274045	-0.0433026	-0.0482199	0.243006	0.373373	-0.158835	-0.0882091	0.101837	-0.323558
bio16	-0.0944568	0.512524	-0.148834	0.534592	-0.577055	0.231989	0.54768	-0.496457	0.487174	0.310951	0.327469	0.561519	0.90575	0.993422	0.102997	0.257969	1	0.213352	0.594759	0.648412	0.0830491	-0.101852	0.301241	0.212925	0.233637	-0.220527	-0.0046238	0.0776	-0.27772	-0.096567	-0.0328862
bio17	0.293405	-0.149516	-0.535081	-0.123175	-0.0377174	-0.352421	0.012699	-0.230073	-0.0742849	-0.202129	-0.226793	-0.0863798	0.551434	0.175797	0.981842	-0.735955	0.213352	1	0.507582	0.419563	0.0818546	-0.414883	0.409995	0.216396	0.124255	-0.421951	-0.364225	0.273607	0.0229403	-0.200854	0.416865
bio18	0.0084874	0.128798	-0.257523	0.268216	-0.312497	-0.184648	0.202777	-0.349072	0.427374	-0.154438	-0.0483187	0.194373	0.651119	0.57982	0.477257	-0.119239	0.594759	0.507582	1	0.212196	-0.00856321	-0.076706	0.139977	0.281782	0.2787	-0.248126	-0.168559	0.230084	-0.268692	-0.0151268	0.0832802
bio19	0.165323	0.254302	-0.25969	0.20721	-0.29544	0.114371	0.337078	-0.322905	0.0838472	0.290472	0.170084	0.289805	0.791715	0.605166	0.31358	-0.196177	0.648412	0.419563	0.212196	1	-0.0433104	-0.310161	0.431171	0.0140829	0.217994	-0.245774	-0.0166531	0.0925869	-0.100576	-0.165294	0.117882
cropland	0.0629762	0.0170849	-0.242804	-0.122074	-0.0153507	0.0240353	0.0742354	-0.0718185	-0.0535747	-0.0259964	0.0378783	0.023843	0.0756704	0.0819402	0.0929951	-0.145643	0.0830491	0.0818546	-0.00856321	-0.0433104	1	-0.276528	0.0973968	0.229066	-0.278023	-0.412406	-0.183992	-0.0841912	0.0184397	-0.265633	-0.0157335
ele	-0.23087	-0.253339	0.486755	0.12441	0.067289	-0.183002	-0.286989	0.222618	-0.126924	-0.152201	-0.324044	-0.200371	-0.236171	-0.0719012	-0.428459	0.266446	-0.101852	-0.414883	-0.076706	-0.310161	-0.276528	1	-0.209893	0.0944419	-0.087559	0.290465	0.278083	0.137336	-0.183233	0.724152	-0.276437
paster	0.00411544	0.0932722	-0.386281	0.153888	-0.272639	-0.130619	0.247578	-0.368271	-0.0910666	0.131328	-0.0434292	0.171176	0.444332	0.281728	0.364533	-0.274045	0.301241	0.409995	0.139977	0.431171	0.0973968	-0.209893	1	-0.0178752	0.0812097	-0.341848	-0.0875179	-0.0232397	-0.0398761	-0.0612377	0.0500594
POP	0.132711	0.0106753	-0.274408	0.0128928	-0.176517	-0.162295	0.123447	-0.24298	-0.116724	0.00568455	-0.095334	0.078643	0.209815	0.216768	0.223257	-0.0433026	0.212925	0.216396	0.281782	0.0140829	0.229066	0.0944419	-0.0178752	1	-0.21531	-0.27879	-0.23756	0.132134	0.158202	0.159259	0.0637692
primf	-0.0365949	-0.102364	0.0658826	0.0853965	0.160751	-0.03944	-0.181454	0.187341	0.121508	-0.161983	-0.0519776	-0.140779	0.277553	0.225757	0.0867842	-0.0482199	0.233637	0.124255	0.2787	0.217994	-0.278023	-0.087559	0.0812097	-0.21531	1	-0.207613	-0.109366	0.106542	-0.225492	-0.0527798	-0.0511854
primn	-0.17175	-0.0317725	0.41419	0.0403654	0.0727292	0.114051	-0.113728	0.202186	0.0919024	0.0182659	0.00310679	-0.0463746	-0.339895	-0.20129	-0.421305	0.243006	-0.220527	-0.421951	-0.248126	-0.245774	-0.412406	0.290465	-0.341848	-0.27879	-0.207613	1	0.0113075	-0.267835	-0.277842	0.213896	-0.196994
rang	-0.104267	0.128474	0.489179	0.202243	-0.0110498	0.279168	0.0250047	0.141394	-0.0119462	0.200032	0.173632	0.0922541	-0.114918	0.0100032	-0.389698	0.373373	-0.0046238	-0.364225	-0.168559	-0.0166531	-0.183992	0.278083	-0.0875179	-0.23756	-0.109366	0.0113075	1	-0.140545	-0.258148	0.0212593	-0.180085
secdf	-0.0499211	-0.220075	-0.0513667	-0.11833	0.102388	-0.260003	-0.182345	0.0536493	-0.0512326	-0.234495	-0.243911	-0.191927	0.160711	0.0661263	0.276434	-0.158835	0.0776	0.273607	0.230084	0.0925869	-0.0841912	0.137336	-0.0232397	0.132134	0.106542	-0.267835	-0.140545	1	-0.243782	0.325734	-0.0192325
secdn	0.262854	0.0748468	-0.284288	-0.201696	0.0136159	0.0272797	0.101463	-0.101563	-0.105129	0.0488753	0.110171	0.0463205	-0.231993	-0.283902	0.0624219	-0.0882091	-0.27772	0.0229403	-0.268692	-0.100576	0.0184397	-0.183233	-0.0398761	0.158202	-0.225492	-0.277842	-0.258148	-0.243782	1	-0.197001	0.139724
slope	-0.176325	-0.363073	0.0634278	-0.0817537	0.0820803	-0.434123	-0.299546	0.0838526	-0.236531	-0.249025	-0.465036	-0.278964	-0.149283	-0.0969177	-0.201046	0.101837	-0.096567	-0.200854	-0.0151268	-0.165294	-0.265633	0.724152	-0.0612377	0.159259	-0.0527798	0.213896	0.0212593	0.325734	-0.197001	1	-0.153138
urban	0.123845	-0.0559184	-0.348578	-0.16096	-0.030206	-0.176588	0.0339612	-0.147441	-0.0739352	-0.0757815	-0.0948498	-0.0250675	0.104698	-0.0534955	0.447767	-0.323558	-0.0328862	0.416865	0.0832802	0.117882	-0.0157335	-0.276437	0.0500594	0.0637692	-0.0511854	-0.196994	-0.180085	-0.0192325	0.139724	-0.153138	1
Note: The highlighted predictors were inputted into the formal species distribution models

## Sheet: Platydemus manokwari
	aspect	bio1	bio2	bio3	bio4	bio5	bio6	bio7	bio8	bio9	bio10	bio11	bio12	bio13	bio14	bio15	bio16	bio17	bio18	bio19	cropland	ele	paster	POP	primf	primn	rang	secdf	secdn	slope	urban
aspect	1	0.021248	-0.0967535	0.0582049	-0.118052	-0.196414	0.0825654	-0.135165	0.0322397	-0.0410662	-0.13125	0.0705992	0.0546786	0.0404124	0.0541381	-0.00721697	0.0455924	0.047105	0.168167	-0.0438411	0.0823075	0.0370793	0.0616394	-0.0249852	0.0530028	-0.0297231	-0.00374126	-0.0944778	0.0609194	0.034701	0.0772696
bio1	0.021248	1	-0.310797	0.655736	-0.725306	0.255308	0.873582	-0.690841	0.674734	0.860072	0.514838	0.930152	0.583856	0.385203	0.396746	-0.12181	0.442238	0.392378	0.131623	0.394904	-0.181965	-0.267248	-0.475559	0.0762156	0.0849918	-0.0858718	-0.0571078	-0.06016	-0.17496	-0.0189167	0.177094
bio2	-0.0967535	-0.310797	1	-0.135068	0.417371	0.531921	-0.57514	0.6766	-0.0844191	-0.261824	0.087357	-0.382524	-0.555517	-0.59312	-0.243776	-0.0441664	-0.542568	-0.2526	-0.42963	-0.237359	0.229747	0.0372083	0.111563	-0.413143	-0.0205084	0.27684	0.176529	0.32595	0.00111524	-0.446255	-0.161162
bio3	0.0582049	0.655736	-0.135068	1	-0.90155	-0.21119	0.811758	-0.784018	0.0504483	0.818039	-0.172039	0.84168	0.582552	0.244713	0.661808	-0.387233	0.271556	0.658285	-0.122773	0.665943	-0.0149095	0.243324	-0.309023	-0.150429	0.254061	-0.118245	-0.016804	-0.195898	-0.0102792	0.195378	0.0526352
bio4	-0.118052	-0.725306	0.417371	-0.90155	1	0.391027	-0.933494	0.948534	-0.160288	-0.784286	0.213461	-0.926761	-0.650366	-0.44409	-0.533627	0.17951	-0.452541	-0.527936	-0.0929082	-0.525653	0.191488	-0.238534	0.379425	0.0537202	-0.24542	0.150363	0.0207622	0.245339	0.00189744	-0.321032	-0.0625582
bio5	-0.196414	0.255308	0.531921	-0.21119	0.391027	1	-0.213003	0.50498	0.463937	0.129406	0.866243	-0.0621956	-0.225503	-0.29138	-0.166762	-0.0254285	-0.208272	-0.172394	-0.257485	-0.133204	0.185998	-0.520137	-0.0512614	-0.0495752	-0.166751	0.152273	0.0432714	0.303388	-0.134293	-0.549795	0.0698775
bio6	0.0825654	0.873582	-0.57514	0.811758	-0.933494	-0.213003	1	-0.950886	0.354385	0.864152	0.0815718	0.971071	0.730156	0.520095	0.545934	-0.178379	0.536519	0.544407	0.172904	0.54462	-0.200938	0.00686481	-0.410333	0.0937574	0.174882	-0.183291	-0.0786973	-0.248635	-0.0644284	0.265324	0.146617
bio7	-0.135165	-0.690841	0.6766	-0.784018	0.948534	0.50498	-0.950886	1	-0.166084	-0.722397	0.202376	-0.877552	-0.716465	-0.551766	-0.535113	0.149524	-0.539946	-0.535548	-0.234319	-0.52332	0.236436	-0.17085	0.346249	-0.0985317	-0.20732	0.210162	0.0832304	0.315762	0.0143705	-0.40857	-0.107384
bio8	0.0322397	0.674734	-0.0844191	0.0504483	-0.160288	0.463937	0.354385	-0.166084	1	0.244672	0.719041	0.446628	0.200604	0.215284	-0.0416481	0.181251	0.29569	-0.0628449	0.393094	-0.108985	-0.270752	-0.470721	-0.454909	0.147726	-0.0132117	0.0683806	-0.0572776	0.187217	-0.331249	-0.23671	0.112497
bio9	-0.0410662	0.860072	-0.261824	0.818039	-0.784286	0.129406	0.864152	-0.722397	0.244672	1	0.274685	0.891544	0.596669	0.304964	0.572909	-0.326094	0.329728	0.584881	-0.137548	0.622427	-0.0422646	-0.0822702	-0.29971	-0.0417406	0.136288	-0.148092	-0.0400034	-0.174372	-0.0506418	0.0874387	0.136833
bio10	-0.13125	0.514838	0.087357	-0.172039	0.213461	0.866243	0.0815718	0.202376	0.719041	0.274685	1	0.168535	0.0210846	-0.0303651	-0.0684377	0.00251871	0.0398207	-0.0661189	0.0144112	-0.0588675	0.0059705	-0.682499	-0.18923	0.15126	-0.184338	0.0593434	-0.0639098	0.208879	-0.22923	-0.431236	0.17189
bio11	0.0705992	0.930152	-0.382524	0.84168	-0.926761	-0.0621956	0.971071	-0.877552	0.446628	0.891544	0.168535	1	0.661199	0.433713	0.507049	-0.177677	0.471212	0.502086	0.104651	0.501756	-0.195613	-0.021926	-0.463905	0.00245618	0.177593	-0.126607	-0.0484355	-0.159085	-0.0933187	0.153949	0.128551
bio12	0.0546786	0.583856	-0.555517	0.582552	-0.650366	-0.225503	0.730156	-0.716465	0.200604	0.596669	0.0210846	0.661199	1	0.772963	0.659828	-0.191917	0.819016	0.662613	0.480679	0.652927	-0.00813585	0.0209102	-0.20848	0.245042	0.357484	-0.212531	-0.212457	-0.148305	-0.137461	0.217084	0.171155
bio13	0.0404124	0.385203	-0.59312	0.244713	-0.44409	-0.29138	0.520095	-0.551766	0.215284	0.304964	-0.0303651	0.433713	0.772963	1	0.143339	0.433537	0.975881	0.133485	0.703093	0.208305	-0.127191	0.0491794	-0.068141	0.321677	0.23683	-0.121498	-0.00526113	-0.236516	-0.172479	0.357228	0.000219727
bio14	0.0541381	0.396746	-0.243776	0.661808	-0.533627	-0.166762	0.545934	-0.535113	-0.0416481	0.572909	-0.0684377	0.507049	0.659828	0.143339	1	-0.731072	0.176998	0.985277	-0.051515	0.89726	0.0699683	0.0159119	-0.16591	0.0235164	0.327691	-0.207597	-0.175148	-0.122399	-0.0107269	0.0817898	0.171468
bio15	-0.00721697	-0.12181	-0.0441664	-0.387233	0.17951	-0.0254285	-0.178379	0.149524	0.181251	-0.326094	0.00251871	-0.177677	-0.191917	0.433537	-0.731072	1	0.373722	-0.763312	0.443994	-0.625835	-0.183612	0.0455868	0.124342	0.158531	-0.140776	0.172007	0.36956	-0.108313	-0.070675	0.149776	-0.223589
bio16	0.0455924	0.442238	-0.542568	0.271556	-0.452541	-0.208272	0.536519	-0.539946	0.29569	0.329728	0.0398207	0.471212	0.819016	0.975881	0.176998	0.373722	1	0.157122	0.716794	0.22444	-0.0743028	0.0192678	-0.106127	0.314667	0.247808	-0.101435	-0.0687826	-0.173197	-0.179661	0.268745	0.0205826
bio17	0.047105	0.392378	-0.2526	0.658285	-0.527936	-0.172394	0.544407	-0.535548	-0.0628449	0.584881	-0.0661189	0.502086	0.662613	0.133485	0.985277	-0.763312	0.157122	1	-0.0688504	0.907759	0.0657837	0.00928321	-0.176686	0.0165129	0.339504	-0.226571	-0.203734	-0.108099	-0.0326556	0.0757999	0.217632
bio18	0.168167	0.131623	-0.42963	-0.122773	-0.0929082	-0.257485	0.172904	-0.234319	0.393094	-0.137548	0.0144112	0.104651	0.480679	0.703093	-0.051515	0.443994	0.716794	-0.0688504	1	-0.134998	-0.183627	-0.0400195	-0.0152506	0.348299	0.215626	0.0302141	-0.0756568	-0.112748	-0.214669	0.199242	0.0062892
bio19	-0.0438411	0.394904	-0.237359	0.665943	-0.525653	-0.133204	0.54462	-0.52332	-0.108985	0.622427	-0.0588675	0.501756	0.652927	0.208305	0.89726	-0.625835	0.22444	0.907759	-0.134998	1	0.116774	0.0182613	-0.164439	0.0706888	0.342508	-0.193972	-0.152024	-0.10862	-0.0615623	0.0803314	0.216469
cropland	0.0823075	-0.181965	0.229747	-0.0149095	0.191488	0.185998	-0.200938	0.236436	-0.270752	-0.0422646	0.0059705	-0.195613	-0.00813585	-0.127191	0.0699683	-0.183612	-0.0743028	0.0657837	-0.183627	0.116774	1	-0.013104	0.50572	-0.152386	0.0160382	-0.0729943	-0.032181	-0.046137	0.0489226	-0.239183	-0.0231556
ele	0.0370793	-0.267248	0.0372083	0.243324	-0.238534	-0.520137	0.00686481	-0.17085	-0.470721	-0.0822702	-0.682499	-0.021926	0.0209102	0.0491794	0.0159119	0.0455868	0.0192678	0.00928321	-0.0400195	0.0182613	-0.013104	1	0.264982	-0.0745331	0.155399	0.0134935	0.0617632	-0.172618	0.0939927	0.504802	-0.086649
paster	0.0616394	-0.475559	0.111563	-0.309023	0.379425	-0.0512614	-0.410333	0.346249	-0.454909	-0.29971	-0.18923	-0.463905	-0.20848	-0.068141	-0.16591	0.124342	-0.106127	-0.176686	-0.0152506	-0.164439	0.50572	0.264982	1	-0.0657314	-0.064149	0.00719648	0.032829	-0.261057	0.0819728	-0.0111491	-0.100933
POP	-0.0249852	0.0762156	-0.413143	-0.150429	0.0537202	-0.0495752	0.0937574	-0.0985317	0.147726	-0.0417406	0.15126	0.00245618	0.245042	0.321677	0.0235164	0.158531	0.314667	0.0165129	0.348299	0.0706888	-0.152386	-0.0745331	-0.0657314	1	-0.164831	0.0310715	-0.0771662	-0.0995324	-0.0539677	0.0874514	0.347661
primf	0.0530028	0.0849918	-0.0205084	0.254061	-0.24542	-0.166751	0.174882	-0.20732	-0.0132117	0.136288	-0.184338	0.177593	0.357484	0.23683	0.327691	-0.140776	0.247808	0.339504	0.215626	0.342508	0.0160382	0.155399	-0.064149	-0.164831	1	-0.428598	-0.0435537	0.210424	-0.226528	0.163019	-0.0299877
primn	-0.0297231	-0.0858718	0.27684	-0.118245	0.150363	0.152273	-0.183291	0.210162	0.0683806	-0.148092	0.0593434	-0.126607	-0.212531	-0.121498	-0.207597	0.172007	-0.101435	-0.226571	0.0302141	-0.193972	-0.0729943	0.0134935	0.00719648	0.0310715	-0.428598	1	-0.0022637	-0.442083	0.117818	-0.0579256	-0.193552
rang	-0.00374126	-0.0571078	0.176529	-0.016804	0.0207622	0.0432714	-0.0786973	0.0832304	-0.0572776	-0.0400034	-0.0639098	-0.0484355	-0.212457	-0.00526113	-0.175148	0.36956	-0.0687826	-0.203734	-0.0756568	-0.152024	-0.032181	0.0617632	0.032829	-0.0771662	-0.0435537	-0.0022637	1	-0.145674	0.00386795	-0.0185592	-0.184472
secdf	-0.0944778	-0.06016	0.32595	-0.195898	0.245339	0.303388	-0.248635	0.315762	0.187217	-0.174372	0.208879	-0.159085	-0.148305	-0.236516	-0.122399	-0.108313	-0.173197	-0.108099	-0.112748	-0.10862	-0.046137	-0.172618	-0.261057	-0.0995324	0.210424	-0.442083	-0.145674	1	-0.227248	-0.322249	0.137029
secdn	0.0609194	-0.17496	0.00111524	-0.0102792	0.00189744	-0.134293	-0.0644284	0.0143705	-0.331249	-0.0506418	-0.22923	-0.0933187	-0.137461	-0.172479	-0.0107269	-0.070675	-0.179661	-0.0326556	-0.214669	-0.0615623	0.0489226	0.0939927	0.0819728	-0.0539677	-0.226528	0.117818	0.00386795	-0.227248	1	0.0690521	-0.148294
slope	0.034701	-0.0189167	-0.446255	0.195378	-0.321032	-0.549795	0.265324	-0.40857	-0.23671	0.0874387	-0.431236	0.153949	0.217084	0.357228	0.0817898	0.149776	0.268745	0.0757999	0.199242	0.0803314	-0.239183	0.504802	-0.0111491	0.0874514	0.163019	-0.0579256	-0.0185592	-0.322249	0.0690521	1	-0.178095
urban	0.0772696	0.177094	-0.161162	0.0526352	-0.0625582	0.0698775	0.146617	-0.107384	0.112497	0.136833	0.17189	0.128551	0.171155	0.000219727	0.171468	-0.223589	0.0205826	0.217632	0.0062892	0.216469	-0.0231556	-0.086649	-0.100933	0.347661	-0.0299877	-0.193552	-0.184472	0.137029	-0.148294	-0.178095	1
Note: The highlighted predictors were inputted into the formal species distribution models

## Sheet:  Coptotermes formosanus
	aspect	bio1	bio2	bio3	bio4	bio5	bio6	bio7	bio8	bio9	bio10	bio11	bio12	bio13	bio14	bio15	bio16	bio17	bio18	bio19	cropland	ele	paster	POP	primf	primn	rang	secdf	secdn	slope	urban
aspect	1	0.0464435	-0.290931	-0.205592	-0.110913	-0.281391	0.161923	-0.204099	0.0465522	-0.0430869	-0.0947753	0.0858841	0.232837	0.366097	-0.0367241	0.1855	0.348018	-0.0377716	0.362928	-0.101608	-0.118145	0.0196164	0.112077	0.0945275	0.23971	0.079136	-0.046261	-0.143194	-0.0748206	0.338623	-0.032978
bio1	0.0464435	1	-0.573902	0.355187	-0.808958	-0.250456	0.932449	-0.851746	0.420148	0.345209	0.410738	0.950286	0.296647	0.495152	-0.131239	0.371318	0.469207	-0.141763	0.439832	-0.12708	-0.266642	-0.192774	-0.0997972	0.177445	0.260244	-0.0113285	0.0456449	-0.193131	-0.134122	0.0241691	0.228343
bio2	-0.290931	-0.573902	1	0.395208	0.418418	0.59325	-0.715062	0.747932	-0.297757	0.0029149	-0.296581	-0.525472	-0.618122	-0.781324	-0.0830394	-0.316567	-0.751861	-0.0396918	-0.724297	0.021568	0.220136	0.264534	0.0192764	-0.332439	-0.303926	-0.127197	-0.0219254	0.388056	0.208433	-0.485289	-0.191854
bio3	-0.205592	0.355187	0.395208	1	-0.604676	-0.00387069	0.314306	-0.268077	-0.0259144	0.466377	-0.306852	0.505805	-0.115276	-0.11744	-0.058349	0.11668	-0.128217	-0.036735	-0.244323	0.129532	-0.103137	0.289063	-0.171675	-0.206514	0.133616	-0.118834	-0.050169	0.132273	0.281159	-0.204439	-0.205018
bio4	-0.110913	-0.808958	0.418418	-0.604676	1	0.593867	-0.905192	0.90969	-0.229337	-0.452399	0.198756	-0.951085	-0.381943	-0.590613	0.0631688	-0.512314	-0.563023	0.0767837	-0.442724	0.0109974	0.317061	-0.248488	0.199662	-0.114031	-0.395613	0.00438263	0.0397085	0.172459	-0.243789	-0.264623	0.0277474
bio5	-0.281391	-0.250456	0.59325	-0.00387069	0.593867	1	-0.55212	0.705503	-0.0653888	-0.260125	0.529881	-0.444606	-0.64095	-0.749097	-0.19079	-0.395086	-0.745845	-0.172974	-0.662369	-0.217219	0.256769	-0.212777	0.353285	-0.206406	-0.439622	0.0879975	0.0782777	0.102091	-0.271085	-0.581656	0.187089
bio6	0.161923	0.932449	-0.715062	0.314306	-0.905192	-0.55212	1	-0.980417	0.337393	0.364662	0.153746	0.968291	0.499381	0.701192	-0.019133	0.450527	0.668367	-0.0442297	0.586685	-0.0183066	-0.318004	-0.0587427	-0.146755	0.211716	0.397999	0.0292837	-0.00553758	-0.261879	-0.011941	0.286605	0.124115
bio7	-0.204099	-0.851746	0.747932	-0.268077	0.90969	0.705503	-0.980417	1	-0.302232	-0.371406	-0.005529	-0.92807	-0.575868	-0.772953	-0.0288008	-0.476269	-0.744284	-0.00326024	-0.655137	-0.0357457	0.330954	-0.000325397	0.208187	-0.228713	-0.44214	-0.00410661	0.0231959	0.246713	-0.0538796	-0.381002	-0.0613088
bio8	0.0465522	0.420148	-0.297757	-0.0259144	-0.229337	-0.0653888	0.337393	-0.302232	1	-0.3462	0.318997	0.337866	0.162561	0.200916	-0.0407784	0.010817	0.205472	0.00636569	0.370942	-0.143946	-0.225407	-0.248798	-0.0808511	0.0840267	0.152207	-0.107225	-0.0349339	-0.0585146	-0.309482	-0.0811144	0.23327
bio9	-0.0430869	0.345209	0.0029149	0.466377	-0.452399	-0.260125	0.364662	-0.371406	-0.3462	1	-0.126866	0.419305	0.177877	0.125949	0.0916506	0.0785338	0.143522	0.112309	0.0635053	0.338734	0.0518658	-0.0746704	-0.301836	0.00484796	0.158785	-0.249243	0.0295144	0.178474	0.136191	-0.112786	-0.134818
bio10	-0.0947753	0.410738	-0.296581	-0.306852	0.198756	0.529881	0.153746	-0.005529	0.318997	-0.126866	1	0.112921	-0.0957502	-0.116183	-0.080585	-0.21927	-0.124422	-0.0811663	-0.00310674	-0.154646	0.0469195	-0.715024	0.162831	0.0882375	-0.181035	0.036641	0.135739	-0.0874563	-0.608902	-0.365259	0.3992
bio11	0.0858841	0.950286	-0.525472	0.505805	-0.951085	-0.444606	0.968291	-0.92807	0.337866	0.419305	0.112921	1	0.364953	0.571108	-0.0890437	0.454807	0.541969	-0.101363	0.46091	-0.0585303	-0.312296	0.0237636	-0.15909	0.148906	0.346886	0.00109471	-0.00124167	-0.197757	0.0553576	0.156336	0.103229
bio12	0.232837	0.296647	-0.618122	-0.115276	-0.381943	-0.64095	0.499381	-0.575868	0.162561	0.177877	-0.0957502	0.364953	1	0.800305	0.67281	-0.140106	0.811729	0.671828	0.786376	0.594836	-0.324849	-0.116809	-0.235756	0.201633	0.633687	-0.0875131	-0.162455	-0.0100653	-0.314617	0.60592	-0.0781968
bio13	0.366097	0.495152	-0.781324	-0.11744	-0.590613	-0.749097	0.701192	-0.772953	0.200916	0.125949	-0.116183	0.571108	0.800305	1	0.139161	0.437942	0.990258	0.115318	0.920312	0.0741111	-0.380321	0.0576228	-0.0694865	0.371498	0.604278	0.00036597	-0.15271	-0.18056	-0.104307	0.686345	0.0545238
bio14	-0.0367241	-0.131239	-0.0830394	-0.058349	0.0631688	-0.19079	-0.019133	-0.0288008	-0.0407784	0.0916506	-0.080585	-0.0890437	0.67281	0.139161	1	-0.733853	0.149157	0.971252	0.169098	0.858177	-0.0213957	-0.19579	-0.224575	-0.139289	0.31366	-0.0530885	-0.0258447	0.15065	-0.353999	0.251787	-0.255559
bio15	0.1855	0.371318	-0.316567	0.11668	-0.512314	-0.395086	0.450527	-0.476269	0.010817	0.0785338	-0.21927	0.454807	-0.140106	0.437942	-0.733853	1	0.425553	-0.760938	0.288867	-0.624777	-0.141759	0.395309	0.122652	0.278656	0.0397849	0.0866843	-0.0334129	-0.290459	0.556605	0.227707	0.205997
bio16	0.348018	0.469207	-0.751861	-0.128217	-0.563023	-0.745845	0.668367	-0.744284	0.205472	0.143522	-0.124422	0.541969	0.811729	0.990258	0.149157	0.425553	1	0.133911	0.941834	0.101768	-0.376489	0.0432787	-0.110564	0.382693	0.605048	-0.051772	-0.18313	-0.131385	-0.107106	0.65369	0.0568416
bio17	-0.0377716	-0.141763	-0.0396918	-0.036735	0.0767837	-0.172974	-0.0442297	-0.00326024	0.00636569	0.112309	-0.0811663	-0.101363	0.671828	0.115318	0.971252	-0.760938	0.133911	1	0.17096	0.896839	-0.110835	-0.218217	-0.312971	-0.148322	0.312132	-0.0931344	-0.0871565	0.18606	-0.368852	0.210058	-0.20584
bio18	0.362928	0.439832	-0.724297	-0.244323	-0.442724	-0.662369	0.586685	-0.655137	0.370942	0.0635053	-0.00310674	0.46091	0.786376	0.920312	0.169098	0.288867	0.941834	0.17096	1	0.0586391	-0.368825	-0.11406	-0.173293	0.381775	0.588197	-0.147395	-0.198773	0.00813575	-0.309703	0.525249	0.0630863
bio19	-0.101608	-0.12708	0.021568	0.129532	0.0109974	-0.217219	-0.0183066	-0.0357457	-0.143946	0.338734	-0.154646	-0.0585303	0.594836	0.0741111	0.858177	-0.624777	0.101768	0.896839	0.0586391	1	-0.0968262	-0.24809	-0.392826	-0.16706	0.325124	-0.23547	-0.060528	0.21234	-0.16642	0.0964369	-0.214448
cropland	-0.118145	-0.266642	0.220136	-0.103137	0.317061	0.256769	-0.318004	0.330954	-0.225407	0.0518658	0.0469195	-0.312296	-0.324849	-0.380321	-0.0213957	-0.141759	-0.376489	-0.110835	-0.368825	-0.0968262	1	0.0126338	0.418245	-0.154702	-0.351723	-0.0692073	0.328994	-0.195521	0.0504969	-0.166722	-0.123118
ele	0.0196164	-0.192774	0.264534	0.289063	-0.248488	-0.212777	-0.0587427	-0.000325397	-0.248798	-0.0746704	-0.715024	0.0237636	-0.116809	0.0576228	-0.19579	0.395309	0.0432787	-0.218217	-0.11406	-0.24809	0.0126338	1	0.256922	-0.0174136	-0.0526034	0.275532	-0.0714382	-0.255773	0.691216	0.348856	-0.131647
paster	0.112077	-0.0997972	0.0192764	-0.171675	0.199662	0.353285	-0.146755	0.208187	-0.0808511	-0.301836	0.162831	-0.15909	-0.235756	-0.0694865	-0.224575	0.122652	-0.110564	-0.312971	-0.173293	-0.392826	0.418245	0.256922	1	-0.00860628	-0.235915	0.423683	0.157771	-0.548203	0.0326097	0.17327	0.00793468
POP	0.0945275	0.177445	-0.332439	-0.206514	-0.114031	-0.206406	0.211716	-0.228713	0.0840267	0.00484796	0.0882375	0.148906	0.201633	0.371498	-0.139289	0.278656	0.382693	-0.148322	0.381775	-0.16706	-0.154702	-0.0174136	-0.00860628	1	0.0451119	0.0978168	-0.0506473	-0.0948853	-0.029295	0.132349	0.216305
primf	0.23971	0.260244	-0.303926	0.133616	-0.395613	-0.439622	0.397999	-0.44214	0.152207	0.158785	-0.181035	0.346886	0.633687	0.604278	0.31366	0.0397849	0.605048	0.312132	0.588197	0.325124	-0.351723	-0.0526034	-0.235915	0.0451119	1	-0.41241	-0.182999	0.213463	-0.232747	0.512673	-0.118489
primn	0.079136	-0.0113285	-0.127197	-0.118834	0.00438263	0.0879975	0.0292837	-0.00410661	-0.107225	-0.249243	0.036641	0.00109471	-0.0875131	0.00036597	-0.0530885	0.0866843	-0.051772	-0.0931344	-0.147395	-0.23547	-0.0692073	0.275532	0.423683	0.0978168	-0.41241	1	0.0987047	-0.637559	0.170794	0.203411	-0.035744
rang	-0.046261	0.0456449	-0.0219254	-0.050169	0.0397085	0.0782777	-0.00553758	0.0231959	-0.0349339	0.0295144	0.135739	-0.00124167	-0.162455	-0.15271	-0.0258447	-0.0334129	-0.18313	-0.0871565	-0.198773	-0.060528	0.328994	-0.0714382	0.157771	-0.0506473	-0.182999	0.0987047	1	-0.202875	0.0675839	-0.0995293	-0.262901
secdf	-0.143194	-0.193131	0.388056	0.132273	0.172459	0.102091	-0.261879	0.246713	-0.0585146	0.178474	-0.0874563	-0.197757	-0.0100653	-0.18056	0.15065	-0.290459	-0.131385	0.18606	0.00813575	0.21234	-0.195521	-0.255773	-0.548203	-0.0948853	0.213463	-0.637559	-0.202875	1	-0.29097	-0.293817	-0.144193
secdn	-0.0748206	-0.134122	0.208433	0.281159	-0.243789	-0.271085	-0.011941	-0.0538796	-0.309482	0.136191	-0.608902	0.0553576	-0.314617	-0.104307	-0.353999	0.556605	-0.107106	-0.368852	-0.309703	-0.16642	0.0504969	0.691216	0.0326097	-0.029295	-0.232747	0.170794	0.0675839	-0.29097	1	0.0751681	0.0188581
slope	0.338623	0.0241691	-0.485289	-0.204439	-0.264623	-0.581656	0.286605	-0.381002	-0.0811144	-0.112786	-0.365259	0.156336	0.60592	0.686345	0.251787	0.227707	0.65369	0.210058	0.525249	0.0964369	-0.166722	0.348856	0.17327	0.132349	0.512673	0.203411	-0.0995293	-0.293817	0.0751681	1	-0.0902551
urban	-0.032978	0.228343	-0.191854	-0.205018	0.0277474	0.187089	0.124115	-0.0613088	0.23327	-0.134818	0.3992	0.103229	-0.0781968	0.0545238	-0.255559	0.205997	0.0568416	-0.20584	0.0630863	-0.214448	-0.123118	-0.131647	0.00793468	0.216305	-0.118489	-0.035744	-0.262901	-0.144193	0.0188581	-0.0902551	1
Note: The highlighted predictors were inputted into the formal species distribution models

[truncated: 5 more sheets: Lymantria dispar,  Trogoderma granarium, Wasmannia auropunctata, Solenopsis invicta, Bemisia tabaci]
