# Supplementary material for: Future Climate Change and Anthropogenic Disturbance Promote the Invasions of the World’s Worst Invasive Insect Pests
Source: Insects. 2024 Apr 16;15(4):280. doi: 10.3390/insects15040280 (PMC11050065; doi:10.3390/insects15040280)
Supplement: Supplementary file 1 [file insects-15-00280-s001.zip › Supplemental Material S4.xlsx]

## Sheet: Sheet1
S4 Algorithms incorporated in the formal species distribution models
Linepithema humile	Anoplophora glabripennis	Aedes albopictus	Pheidole megacephala	Anopheles quadrimaculatus	Vespula vulgaris	Anoplolepis gracilipes	Cinara cupressi	Platydemus manokwari	Coptotermes formosanus	Lymantria dispar	Trogoderma granarium	Wasmannia auropunctata	Solenopsis invicta	Bemisia tabaci
ANN	CTA	CTA	CTA	CTA	ANN	ANN	ANN	ANN	CTA	ANN	CTA	CTA	ANN	CTA
CTA	FDA	FDA	FDA	FDA	CTA	CTA	CTA	CTA	FDA	CTA	FDA	FDA	CTA	FDA
FDA	GBM	GBM	GBM	GBM	FDA	FDA	FDA	FDA	GBM	FDA	GBM	GBM	FDA	GBM
GBM	GLM	GLM	GLM	GLM	GBM	GBM	GBM	GBM	GLM	GBM	GLM	GLM	GBM	GLM
GLM	MARS	MARS	MARS	MARS	GLM	GLM	GLM	GLM	MARS	GLM	MARS	MARS	GLM	MARS
MARS	MAXENT	MAXENT	MAXENT	MAXENT	MARS	MARS	MARS	MARS	MAXENT	MARS	MAXENT	MAXENT	MARS	MAXENT
MAXENT	MAXNET	MAXNET	MAXNET	MAXNET	MAXENT	MAXENT	MAXENT	MAXENT	MAXNET	MAXENT	MAXNET	MAXNET	MAXENT	MAXNET
MAXNET	RF	RF	RF	RF	MAXNET	MAXNET	MAXNET	MAXNET	RF	MAXNET	RF	RF	MAXNET	RF
RF	XGBOOST	XGBOOST	XGBOOST	XGBOOST	RF	RF	RF	RF	XGBOOST	RF	XGBOOST	XGBOOST	RF	XGBOOST
XGBOOST					XGBOOST	XGBOOST	XGBOOST	XGBOOST		XGBOOST			XGBOOST

## Sheet: Sheet2
Aedes albopictus	CTA	FDA	GBM	GLM	MARS	MAXENT	MAXNET	RF	XGBOOST
Anopheles quadrimaculatus	CTA	FDA	GBM	GLM	MARS	MAXENT	MAXNET	RF	XGBOOST
Anoplolepis gracilipes	ANN	CTA	FDA	GBM	GLM	MARS	MAXENT	MAXNET	RF	XGBOOST
Anoplophora glabripennis	CTA	FDA	GBM	GLM	MARS	MAXENT	MAXNET	RF	XGBOOST
Bemisia tabaci	CTA	FDA	GBM	GLM	MARS	MAXENT	MAXNET	RF	XGBOOST
Cinara cupressi	ANN	CTA	FDA	GBM	GLM	MARS	MAXENT	MAXNET	RF	XGBOOST
Coptotermes formosanus	CTA	FDA	GBM	GLM	MARS	MAXENT	MAXNET	RF	XGBOOST
Linepithema humile	ANN	CTA	FDA	GBM	GLM	MARS	MAXENT	MAXNET	RF	XGBOOST
Lymantria dispar	ANN	CTA	FDA	GBM	GLM	MARS	MAXENT	MAXNET	RF	XGBOOST
Pheidole megacephala	CTA	FDA	GBM	GLM	MARS	MAXENT	MAXNET	RF	XGBOOST
Platydemus manokwari	ANN	CTA	FDA	GBM	GLM	MARS	MAXENT	MAXNET	RF	XGBOOST
Solenopsis invicta	ANN	CTA	FDA	GBM	GLM	MARS	MAXENT	MAXNET	RF	XGBOOST
Trogoderma granarium	CTA	FDA	GBM	GLM	MARS	MAXENT	MAXNET	RF	XGBOOST
Vespula vulgaris	ANN	CTA	FDA	GBM	GLM	MARS	MAXENT	MAXNET	RF	XGBOOST
Wasmannia auropunctata	CTA	FDA	GBM	GLM	MARS	MAXENT	MAXNET	RF	XGBOOST
