# Supplementary material for: Future Climate Change and Anthropogenic Disturbance Promote the Invasions of the World’s Worst Invasive Insect Pests
Source: Insects. 2024 Apr 16;15(4):280. doi: 10.3390/insects15040280 (PMC11050065; doi:10.3390/insects15040280)
Supplement: Supplementary file 1 [file insects-15-00280-s001.zip › Supplemental Material S5.xlsx]

## Sheet: Sheet1
S5 The AUCs and TSSs in the models for the ranges of the 15 worst IIPs
Species	AUC	TSS
Linepithema humile	0.993	0.915667
Aedes albopictus	0.98	0.874667
Platydemus manokwari	0.998	0.965667
Cinara cupressi	0.956	0.823
Pheidole megacephala	0.989333	0.898
Anoplolepis gracilipes	0.978	0.861
Trogoderma granarium	0.994333	0.963667
Anoplophora glabripennis	0.999	0.992
Coptotermes formosanus	0.996	0.941
Vespula vulgaris	0.992	0.917
Solenopsis invicta	0.998	0.961
Anopheles quadrimaculatus	0.996333	0.959
Lymantria dispar	0.989	0.910333
Wasmannia auropunctata	0.99	0.900667
Bemisia tabaci	0.988	0.898333
