# Supplementary material for: Future Climate Change and Anthropogenic Disturbance Promote the Invasions of the World’s Worst Invasive Insect Pests
Source: Insects. 2024 Apr 16;15(4):280. doi: 10.3390/insects15040280 (PMC11050065; doi:10.3390/insects15040280)
Supplement: Supplementary file 1 [file insects-15-00280-s001.zip › Supplemental Material S6.xlsx]

## Sheet: Sheet1
S6 Importance scores of the predictors in the formal models
Linepithema humile			Anoplophora glabripennis			Aedes albopictus			Pheidole megacephala			Anopheles quadrimaculatus			Vespula vulgaris			Anoplolepis gracilipes			Cinara cupressi			Platydemus manokwari			Coptotermes formosanus shiraki			Lymantria dispar			Trogoderma granarium			Wasmannia auropunctata			Solenopsis invicta			Bemisia tabaci
Predictors	Importance values		Predictors	Importance values		Predictors	Importance values		Predictors	Importance values		Predictors	Importance values		Predictors	Importance values		Predictors	Importance values		Predictors	Importance values		Predictors	Importance values		Predictors	Importance values		Predictors	Importance values		Predictors	Importance values		Predictors	Importance values		Predictors	Importance values		Predictors	Importance values
bio11	0.182689		urban	0.263528		bio11	0.157911		bio3	0.180701		POP	0.0839151		bio4	0.164807		bio4	0.260324		bio3	0.188439		urban	0.238707		urban	0.278966		bio10	0.138862		bio4	0.202294		bio6	0.14342		POP	0.114826		POP	0.133231
urban	0.113003		POP	0.162127		POP	0.102655		urban	0.0733151		urban	0.0407558		bio1	0.147029		POP	0.0494558		bio7	0.151752		bio18	0.102161		bio14	0.0458428		bio3	0.133354		urban	0.083782		bio3	0.10696		bio1	0.0976286		bio11	0.122207
bio19	0.0264167		bio3	0.073369		urban	0.0534364		bio1	0.0479958		bio10	0.0204188		bio10	0.0529479		bio18	0.0463436		bio10	0.123131		bio11	0.0616436		bio1	0.042764		bio8	0.0167993		rang	0.0630133		bio14	0.0663534		urban	0.0293931		cropland	0.0635948
bio3	0.0157301		bio6	0.0673432		bio10	0.0377596		bio7	0.0342066		bio12	0.0172557		urban	0.0498448		bio8	0.02346		cropland	0.114676		primf	0.0358296		bio10	0.0254266		bio7	0.0151996		bio14	0.0526883		bio12	0.034984		bio14	0.0284371		bio7	0.0285692
bio5	0.00924956		cropland	0.0621413		bio12	0.0300886		primf	0.0331046		bio15	0.0124522		bio15	0.0184033		bio13	0.0178066		bio16	0.0868777		bio17	0.0202812		POP	0.0215933		bio17	0.0151229		cropland	0.0510763		urban	0.0297542		bio3	0.00714422		bio1	0.0193599
ele	0.00921022		bio15	0.0265689		ele	0.0194853		bio18	0.0249032		bio18	0.00810233		bio2	0.0157551		urban	0.0174336		bio2	0.0767407		bio10	0.0185483		bio8	0.010718		paster	0.0140842		POP	0.0394253		POP	0.0110526		bio2	0.00530156		paster	0.0146661
POP	0.00731867		bio5	0.0259492		paster	0.00922478		cropland	0.014369		bio7	0.00773467		bio8	0.011396		bio2	0.0113696		POP	0.0704793		ele	0.0107657		bio3	0.00828078		urban	0.0116126		bio15	0.023901		bio10	0.0102837		bio10	0.00484122		rang	0.0137582
bio16	0.00644456		bio2	0.00710378		primf	0.00817622		ele	0.0119126		paster	0.00685789		ele	0.00537567		rang	0.00875767		primn	0.0457427		POP	0.00730444		bio9	0.00666122		bio19	0.0109628		primn	0.0236983		paster	0.00635756		bio18	0.003634		urban	0.0123131
bio8	0.00339611		rang	0.00666144		bio14	0.00677		primn	0.0102931		ele	0.00526233		secdf	0.00373444		slope	0.00852756		bio18	0.0456723		bio2	0.00586922		rang	0.004225		bio2	0.00923833		secdn	0.0220513		bio18	0.00447367		secdn	0.00245022		bio15	0.0104599
primf	0.00266189		bio16	0.00628111		cropland	0.00633744		POP	0.00872222		secdn	0.00471722		cropland	0.00346244		primf	0.00555856		rang	0.036399		secdf	0.003295		bio16	0.00308522		bio9	0.00829111		primf	0.0211763		slope	0.00325822		ele	0.00191311		bio12	0.006601
rang	0.00216178		slope	0.00535844		slope	0.00443467		bio14	0.00846844		bio2	0.004589		POP	0.00339389		paster	0.00514822		primf	0.0217653		paster	0.00264778		cropland	0.002354		rang	0.00566722		paster	0.0191387		primf	0.00295022		bio9	0.00171556		secdn	0.00367244
cropland	0.00171711		primf	0.00406489		rang	0.00327722		secdn	0.00568644		primf	0.00430467		primf	0.00331444		ele	0.00384178		bio8	0.0186733		primn	0.00228589		primf	0.00208378		POP	0.00413711		bio13	0.018231		rang	0.00201856		paster	0.001291		bio2	0.00230467
secdn	0.00168122		secdf	0.00387478		bio2	0.00268878		slope	0.00536811		rang	0.00366		secdn	0.00127733		bio15	0.00157811		ele	0.0181997		cropland	0.00226289		paster	0.00161389		ele	0.00363511		bio10	0.0136327		cropland	0.00142444		cropland	0.000928111		primn	0.00223933
bio2	0.00148833		secdn	0.00349144		bio8	0.00146889		rang	0.00401589		primn	0.00305611		rang	0.000887111		cropland	0.00152722		urban	0.013197		slope	0.00208033		secdn	0.00159511		cropland	0.00260222		slope	0.00847367		secdf	0.000625556		slope	0.000820889		ele	0.00209378
bio9	0.00133867		aspect	0.00268222		bio19	0.00141944		bio19	0.00313878		cropland	0.00248067		bio16	0.000698		bio19	0.000989222		aspect	0.012273		secdn	0.00185156		slope	0.00156589		primf	0.00200922		secdf	0.007962		primn	0.000618778		primf	0.000819667		bio19	0.00110256
bio17	0.001006		primn	0.00267211		secdn	0.00127778		bio15	0.00226567		bio8	0.00110167		primn	0.000598222		primn	0.000463778		secdf	0.0118123		aspect	0.00142356		primn	0.001406		bio13	0.00100378		bio19	0.004764		secdn	0.000617889		primn	0.000453333		primf	0.000884
slope	0.000728333		paster	0.00179578		bio18	0.001007		paster	0.00205456		secdf	0.00105944		paster	0.000596889		secdf	0.000398		bio14	0.00563867		rang	0.000965667		aspect	0.000543333		bio15	0.001003		aspect	0.002015		aspect	0.000349889		rang	0.000417333		slope	0.000547556
primn	0.000595778					primn	0.000817111		secdf	0.00153367		slope	0.000652333		aspect	0.000113222		aspect	0.000277111		secdn	0.00444333					secdf	0.000398444		secdf	0.000565556								secdf	0.000337222		aspect	0.000232444
paster	0.000472222					secdf	0.000762889		aspect	0.000850889		aspect	5.06667e-05					secdn	0.000270333		bio19	0.00345633								primn	0.000542667								bio8	0.000262444		secdf	0.000114
aspect	0.000165556					aspect	0.000172														paster	0.00149467								secdn	0.000292667								aspect	0.000215111
secdf	6.64444e-05																													aspect	6.92222e-05
