# Supplementary material for: Future Climate Change and Anthropogenic Disturbance Promote the Invasions of the World’s Worst Invasive Insect Pests
Source: Insects. 2024 Apr 16;15(4):280. doi: 10.3390/insects15040280 (PMC11050065; doi:10.3390/insects15040280)
Supplement: Supplementary file 1 [file insects-15-00280-s001.zip › Supplemental Material S8.xlsx]

## Sheet: Sheet1
S8 Thresholds for calibrating the ranges of the 15 worst invasive insect pests
	MSS threshold
Scientific name	Current	F126	F585	M126	M585
Aedes albopictus	0.53	0.56	0.42	0.55	0.43
Anopheles quadrimaculatus	0.405	0.26	0.32	0.25	0.27
Anoplolepis gracilipes	0.54	0.64	0.46	0.57	0.61
Anoplophora glabripennis	0.45	0.28	0.2	0.25	0.21
Coptotermes formosanus shiraki	0.34	0.51	0.43	0.56	0.5
Trogoderma granarium	0.38	0.44	0.38	0.42	0.42
Bemisia tabaci	0.48	0.66	0.54	0.5	0.57
Cinara cupressi	0.32	0.35	0.18	0.35	0.26
Linepithema humile	0.46	0.58	0.44	0.63	0.44
Lymantria dispar	0.53	0.45	0.24	0.45	0.24
Pheidole megacephala	0.53	0.58	0.38	0.55	0.47
Platydemus manokwari	0.31	0.6	0.43	0.59	0.62
Solenopsis invicta	0.35	0.35	0.29	0.38	0.39
Vespula vulgaris	0.49	0.42	0.3	0.51	0.34
Wasmannia auropunctata	0.55	0.63	0.38	0.6	0.37
